# Supplementary material for: Conversion of cellulose into valuable chemicals using sulfonated amorphous carbon in 1-ethyl-3-methylimidazolium chloride
Source: Royal Society of Chemistry journal article supplement (doi:10.1039/d3ra00177f), 2023-01-01
Supplement: d3ra00177f1.pdf [file d3ra00177f1.pdf]

## Supporting Information

### **Conversion of cellulose into valuable chemicals using sulfonated amorphous carbon in 1-ethyl-3-methylimidazolium chloride**

Thien-Hang Thi Nguyen,<sup>a,b,‡</sup> Ha Bich Phan,<sup>a,b,c,‡</sup> Trinh Hao Nguyen,<sup>a,b</sup> Kim Nguyen Tran,<sup>a,b</sup> Linh Ho Thuy Nguyen,<sup>b,d</sup> Tan Le Hoang Doan,<sup>b,d</sup> Phuong Hoang Tran<sup>a,b\*</sup>

<sup>a</sup> Department of Organic Chemistry, Faculty of Chemistry, University of Science, Vietnam National University – Ho Chi Minh City, Vietnam.

<sup>b</sup> Vietnam National University, Ho Chi Minh City, Vietnam.

<sup>c</sup> Institute of Public Health, Ho Chi Minh City, Vietnam

<sup>d</sup> Center for Innovative Materials and Architectures (INOMAR), Ho Chi Minh City, Vietnam

\*Corresponding author: phone number: +84-903-706-762; e-mail: [thphuong@hcmus.edu.vn](mailto:thphuong@hcmus.edu.vn)

‡ These authors contributed equally to this work.

|       |   |    |            |            |            |    |    |     |
|-------|---|----|------------|------------|------------|----|----|-----|
| 9.428 | 1 | 1  | 10.00000   | 75.55061   | 1.32362e-1 | No | No | HMF |
|       |   | 2  | 20.00000   | 163.26151  | 1.22503e-1 |    |    |     |
|       |   | 3  | 40.00000   | 316.68356  | 1.26309e-1 |    |    |     |
|       |   | 4  | 60.00000   | 494.78055  | 1.21266e-1 |    |    |     |
|       |   | 5  | 80.00000   | 660.16162  | 1.21182e-1 |    |    |     |
|       |   | 6  | 100.00000  | 806.07642  | 1.24058e-1 |    |    |     |
|       |   | 7  | 200.00000  | 1651.35583 | 1.21113e-1 |    |    |     |
|       |   | 8  | 400.00000  | 3287.28638 | 1.21681e-1 |    |    |     |
|       |   | 9  | 600.00000  | 4902.00635 | 1.22399e-1 |    |    |     |
|       |   | 10 | 800.00000  | 6485.20020 | 1.23358e-1 |    |    |     |
|       |   | 11 | 1000.00000 | 8036.38916 | 1.24434e-1 |    |    |     |

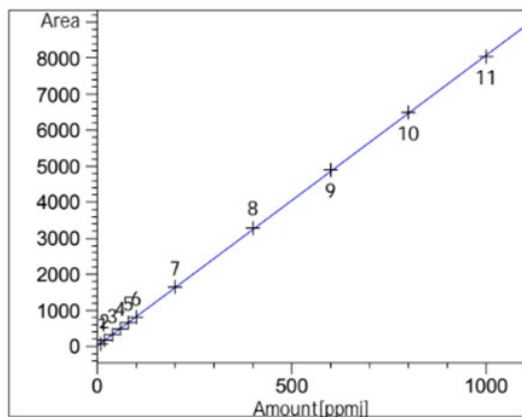

HMF at exp. RT: 9.428  
DAD1 A, Sig=210,4 Ref=360,100  
Correlation: 0.99995  
Residual Std. Dev.: 29.05925  
Formula:  $y = mx + b$   
m: 8.07940  
b: 11.32748  
x: Amount [ppmj]  
y: Area

Fig. S1 Calibration curve of 5-HMF

|       |   |    |            |           |         |    |    |                |
|-------|---|----|------------|-----------|---------|----|----|----------------|
| 8.703 | 1 | 1  | 10.00000   | 2.87304   | 3.48063 | No | No | Levulinic acid |
|       |   | 2  | 20.00000   | 4.90583   | 4.07678 |    |    |                |
|       |   | 3  | 40.00000   | 9.24804   | 4.32524 |    |    |                |
|       |   | 4  | 60.00000   | 15.38773  | 3.89921 |    |    |                |
|       |   | 5  | 80.00000   | 20.71138  | 3.86261 |    |    |                |
|       |   | 6  | 100.00000  | 24.94534  | 4.00876 |    |    |                |
|       |   | 7  | 200.00000  | 57.17052  | 3.49831 |    |    |                |
|       |   | 8  | 400.00000  | 114.74293 | 3.48605 |    |    |                |
|       |   | 9  | 600.00000  | 173.37660 | 3.46067 |    |    |                |
|       |   | 10 | 800.00000  | 231.27058 | 3.45915 |    |    |                |
|       |   | 11 | 1000.00000 | 289.87268 | 3.44979 |    |    |                |

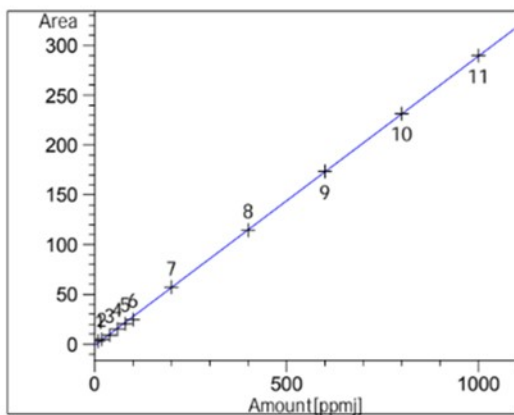

Levulinic acid at exp. RT: 8.703  
DAD1 A, Sig=210,4 Ref=360,100  
Correlation: 0.99994  
Residual Std. Dev.: 1.19897  
Formula:  $y = mx + b$   
m: 2.91265e-1  
b: -1.63175  
x: Amount [ppmj]  
y: Area

Fig. S2 Calibration curve of LA

3.308 1 1 10.00000 5.53259 1.80747 No No Formic acid  
 2 20.00000 12.16538 1.64401

DAD 10/28/2021 3:56:22 PM SYSTEM

I D:\METHOD\HMF\_cot\_150\_hat\_nho\_KQ.M

| RT | Sig | Lvl | Amount [ppmj] | Area      | Rsp.Factor | Ref | ISTD # | Compound |
|----|-----|-----|---------------|-----------|------------|-----|--------|----------|
| 3  |     |     | 40.00000      | 25.88959  | 1.54502    |     |        |          |
| 4  |     |     | 60.00000      | 37.85853  | 1.58485    |     |        |          |
| 5  |     |     | 80.00000      | 56.45914  | 1.41695    |     |        |          |
| 6  |     |     | 100.00000     | 70.78948  | 1.41264    |     |        |          |
| 7  |     |     | 200.00000     | 144.12086 | 1.38772    |     |        |          |
| 8  |     |     | 400.00000     | 316.02692 | 1.26571    |     |        |          |
| 9  |     |     | 600.00000     | 475.57336 | 1.26163    |     |        |          |
| 10 |     |     | 800.00000     | 635.59711 | 1.25866    |     |        |          |
| 11 |     |     | 1000.00000    | 764.11377 | 1.30871    |     |        |          |

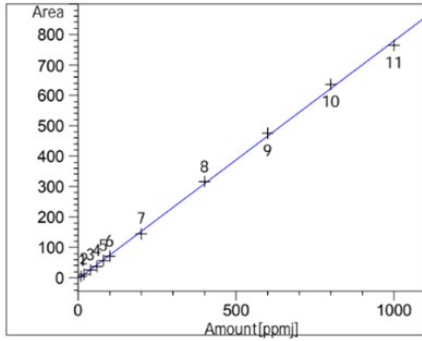

Formic acid at exp. RT: 3.308  
 DAD1 A, Sig=210,4 Ref=360,100  
 Correlation: 0.99958  
 Residual Std. Dev.: 8.19957  
 Formula:  $y = mx + b$   
 m: 7.84221e-1  
 b: -4.30366  
 x: Amount [ppmj]  
 y: Area

Fig. S3 Calibration curve of FA

10.137 1 1 10.00000 130.14398 7.68380e-2 No No DFF  
 2 20.00000 322.96695 6.19258e-2  
 4 60.00000 959.88232 6.25077e-2  
 5 80.00000 1282.51855 6.23773e-2  
 6 100.00000 2033.88818 4.91669e-2  
 7 200.00000 3226.26563 6.19912e-2  
 8 400.00000 6462.66455 6.18940e-2  
 9 600.00000 9722.19727 6.17144e-2  
 10 800.00000 1.29986e4 6.15451e-2  
 11 1000.00000 1.62684e4 6.14687e-2

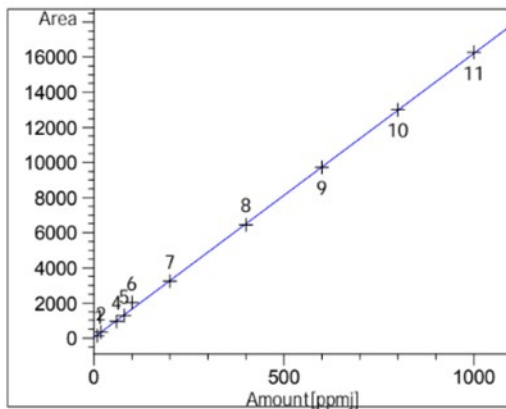

DFF at exp. RT: 10.137  
 DAD1 A, Sig=210,4 Ref=360,100  
 Correlation: 0.99975  
 Residual Std. Dev.: 134.25755  
 Formula:  $y = mx + b$   
 m: 16.20105  
 b: 39.10210  
 x: Amount [ppmj]  
 y: Area

Fig. S4 Calibration curve of DFF

```

11.104 1 1 10.00000 91.20168 1.09647e-1 No No Furfural
      2 20.00000 185.23088 1.07973e-1
      3 40.00000 377.13260 1.06063e-1

```

DAD 10/28/2021 3:56:22 PM SYSTEM

d D:\METHOD\HMF\_cot\_150\_hat\_nho\_KQ.M

| RT | Sig        | Lvl        | Amount<br>[ppmj] | Area | Rsp.Factor | Ref | ISTD # | Compo: |
|----|------------|------------|------------------|------|------------|-----|--------|--------|
| 4  | 60.00000   | 560.21387  | 1.07102e-1       |      |            |     |        |        |
| 5  | 80.00000   | 758.74957  | 1.05437e-1       |      |            |     |        |        |
| 6  | 100.00000  | 919.84766  | 1.08714e-1       |      |            |     |        |        |
| 7  | 200.00000  | 1904.31189 | 1.05025e-1       |      |            |     |        |        |
| 8  | 400.00000  | 3790.19458 | 1.05535e-1       |      |            |     |        |        |
| 9  | 600.00000  | 5721.13330 | 1.04874e-1       |      |            |     |        |        |
| 10 | 800.00000  | 7523.19629 | 1.06338e-1       |      |            |     |        |        |
| 11 | 1000.00000 | 9341.49414 | 1.07049e-1       |      |            |     |        |        |

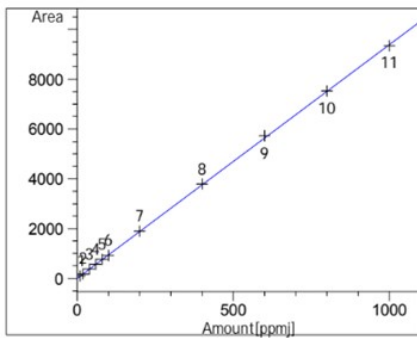

Furfural at exp. RT: 11.104  
DAD1 A, Sig=210,4 Ref=360,100  
Correlation: 0.99995  
Residual Std. Dev.: 34.14965  
Formula:  $y = mx + b$   
m: 9.39369  
b: 6.63313  
x: Amount[ppmj]  
y: Area

Fig. S5 Calibration curve of Fur

```

10.845 1 1 10.00000 51.88923 1.92718e-1 No No FDCA
      2 20.00000 104.28742 1.91778e-1
      3 40.00000 205.91724 1.94253e-1
      4 60.00000 311.60834 1.92549e-1
      5 80.00000 414.48544 1.93010e-1
      6 100.00000 518.91388 1.92710e-1
      7 200.00000 1026.62048 1.94814e-1
      8 400.00000 2031.10559 1.96937e-1
      9 600.00000 3018.93579 1.98746e-1
     10 800.00000 3987.89380 2.00607e-1
     11 1000.00000 4947.75244 2.02112e-1

```

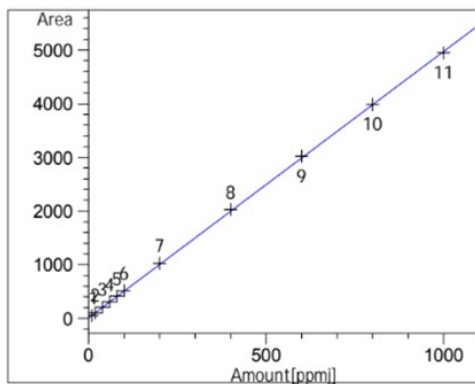

FDCA at exp. RT: 10.845  
DAD1 A, Sig=210,4 Ref=360,100  
Correlation: 0.99995  
Residual Std. Dev.: 18.75911  
Formula:  $y = mx + b$   
m: 4.96344  
b: 15.86898  
x: Amount[ppmj]  
y: Area

Fig. S6 Calibration curve of FDCA



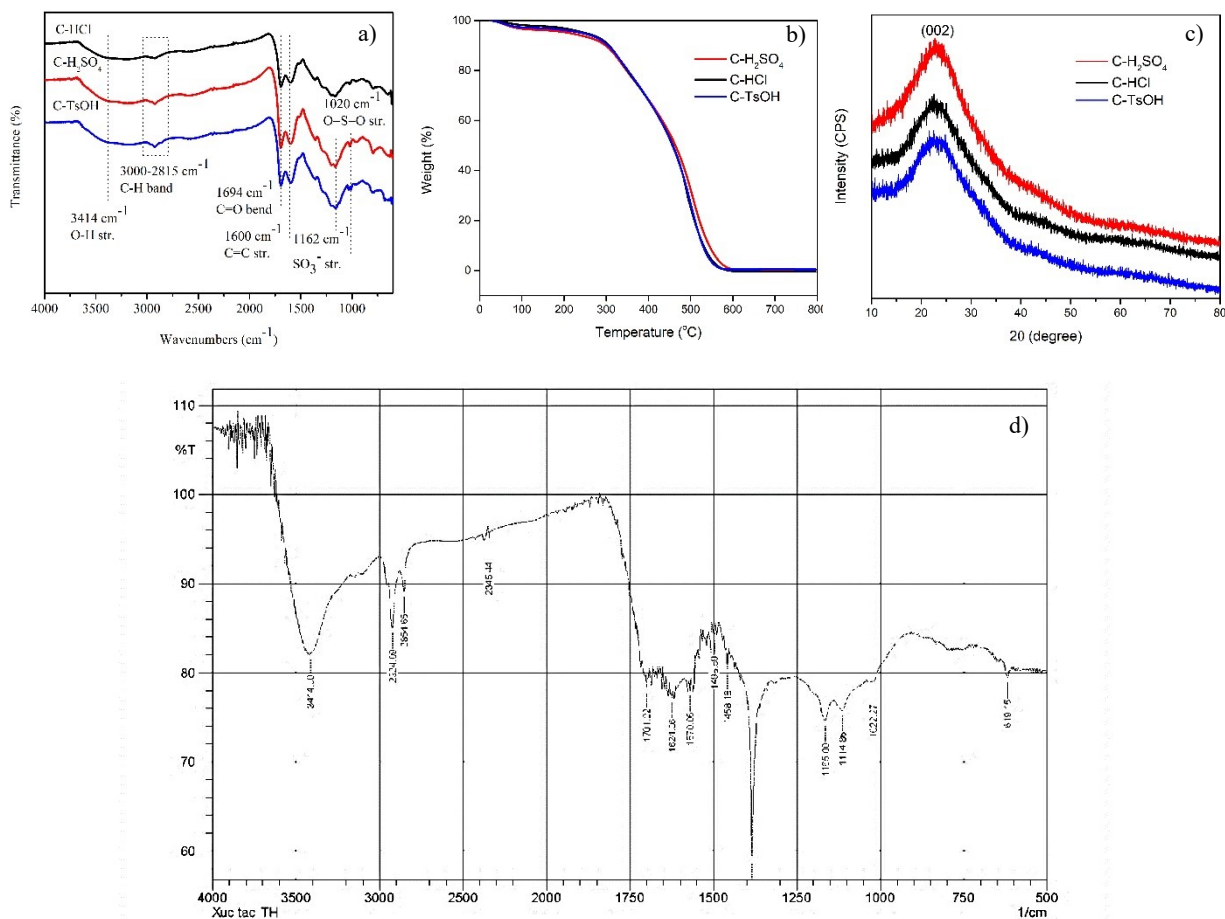

Fig. S7 Characterization of catalysts: a) FT-IR spectrum, b) TGA curve, c) XRD pattern, and d) FT-IR spectra of recovered C-H<sub>2</sub>SO<sub>4</sub>

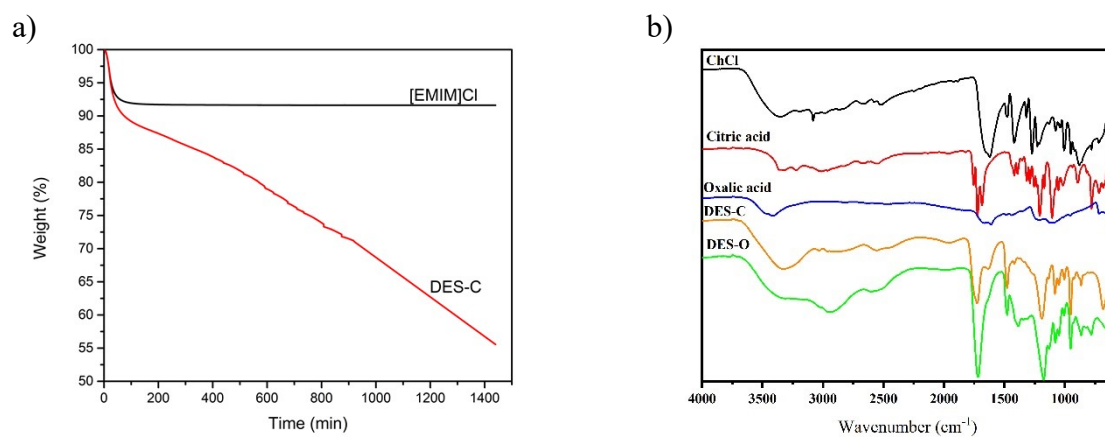

Fig. S8 a) TGA curves of [EMIM]Cl and DES-C at 120 °C and b) FTIR of the original DES-C and DES-O

# The HPLC chromatography of HMF, DFF, LA, FA, Fur, and FDCA

Data File D:\DATA\20...12-Hang\_Trinh\_Ha\2021-12-19-HMF 2021-12-19 15-53-33\THD 31\_tl 101.D  
 Sample Name: THD 31\_tl 101

```

=====
Acq. Operator   : SYSTEM                      Seq. Line : 54
Acq. Instrument : HPLC-DAD                    Location  : P1-F-01
Injection Date  : 12/20/2021 7:54:26 AM      Inj       : 1
                                           Inj Volume: 10.000 µl
Different Inj Volume from Sample Entry! Actual Inj Volume : 1.000 µl
Acq. Method     : D:\DATA\2021\Thang 12\19-12-Hang_Trinh_Ha\2021-12-19-HMF 2021-12-19 15-53-
                 33\HMF_cot 150_hat nho.M
Last changed    : 11/30/2021 8:55:26 PM by SYSTEM
Analysis Method : D:\METHOD\HMF_cot 150_hat nho_285nmKQ.M
Last changed    : 12/29/2021 10:03:33 PM by SYSTEM
Additional Info : Peak(s) manually integrated
  
```

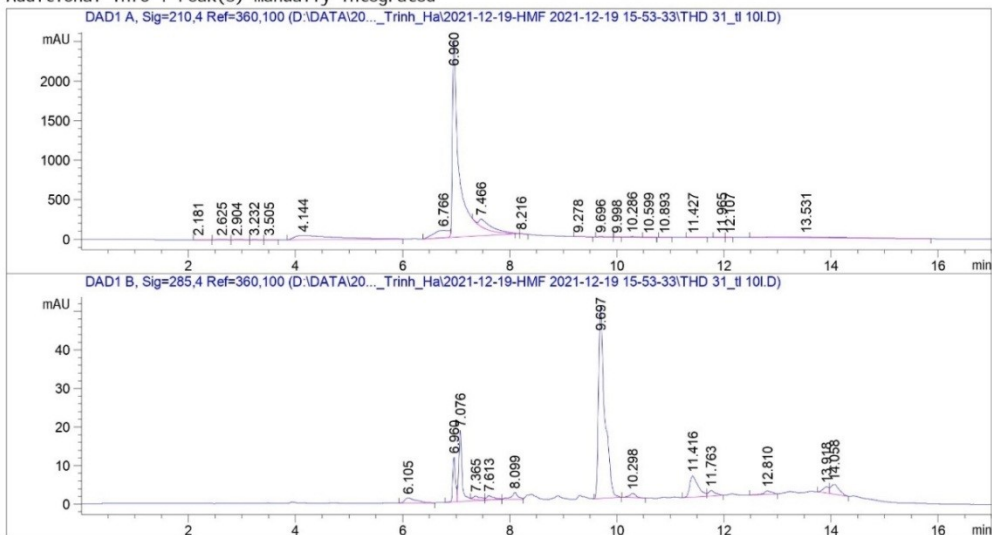

## External Standard Report

```

Sorted By      : Signal
Calib. Data Modified : 12/29/2021 10:00:38 PM
Multiplier     : 1.0000
Dilution       : 1.0000
Do not use Multiplier & Dilution Factor with ISTDs
  
```

Signal 1: DAD1 A, Sig=210,4 Ref=360,100

Signal 2: DAD1 B, Sig=285,4 Ref=360,100

| RetTime [min] | Type | Area [mAU*s] | Amt/Area   | Amount [ppm] | Grp | Name           |
|---------------|------|--------------|------------|--------------|-----|----------------|
| 8.900         | -    | -            | -          | -            | -   | Levulinic acid |
| 9.697         | BB   | 402.17160    | 8.65844e-3 | 3.48218      | -   | HMF            |
| 10.298        | BB   | 9.46236      | 4.45163e-2 | 4.21229e-1   | -   | DFF            |

Fig. S9 Reaction conditions: Cellulose (162 mg), [EMIM]Cl (1 g, 7 mmol), 120 °C, 24 h

```

=====
Acq. Operator   : SYSTEM                      Seq. Line : 28
Acq. Instrument : HPLC-DAD                    Location  : P1-C-03
Injection Date  : 12/23/2021 2:17:55 AM      Inj       : 1
                                           Inj Volume: 10.000 µl
Acq. Method     : D:\DATA\2021\Thang 12\22-12-Hang_Trinh_Ha\2021-12-22-HMF 2021-12-22 18-08-06\HMF_cot 150_hat_nho.M
Last changed    : 11/30/2021 8:55:26 PM by SYSTEM
Analysis Method : D:\METHOD\HMF_cot 150_hat_nho_KQ.M
Last changed    : 12/25/2021 12:53:04 PM by SYSTEM
Additional Info : Peak(s) manually integrated
  
```

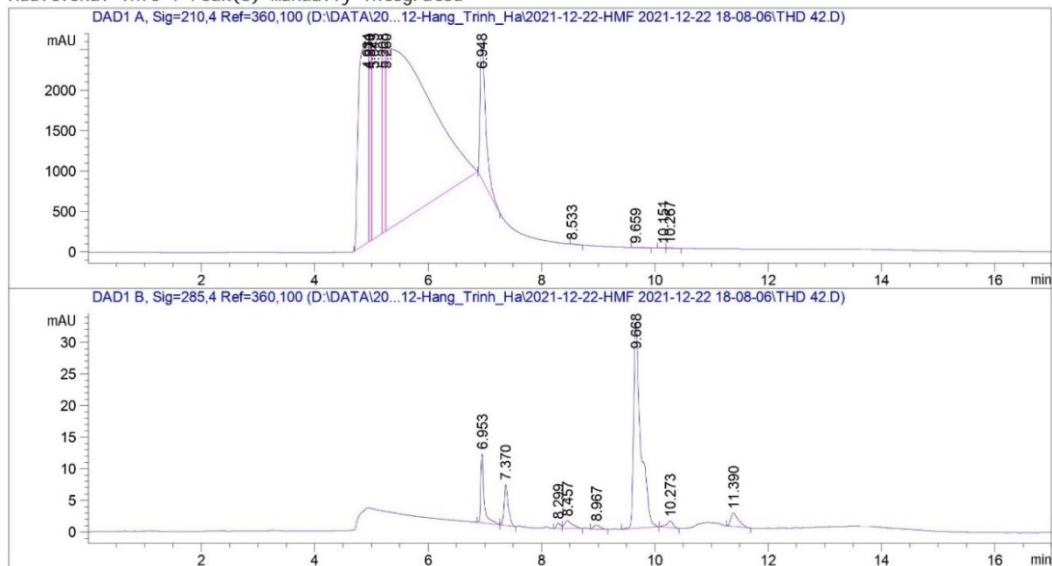

External Standard Report

```

Sorted By      : Signal
Calib. Data Modified : 12/25/2021 8:45:54 AM
Multiplier     : 1.0000
Dilution       : 1.0000
Do not use Multiplier & Dilution Factor with ISTDs
  
```

Signal 1: DAD1 A, Sig=210,4 Ref=360,100

| RetTime [min] | Type | Area [mAU*s] | Amt/Area   | Amount [ppm] | Grp | Name           |
|---------------|------|--------------|------------|--------------|-----|----------------|
| 3.500         | -    | -            | -          | -            | -   | Formic acid    |
| 8.900         | -    | -            | -          | -            | -   | Levulinic acid |
| 9.659         | BB   | 29.14172     | 7.56611e-2 | 2.20490      | -   | HMF            |
| 10.267        | VB   | 39.44868     | 5.42278e-4 | 2.13922e-2   | -   | DFF            |
| 11.000        | -    | -            | -          | -            | -   | FDCA           |
| 11.300        | -    | -            | -          | -            | -   | Furfural       |

Fig. S10 Reaction conditions: Cellulose (162 mg), C-H<sub>2</sub>SO<sub>4</sub> (1 mg), [EMIM]Cl (1 g, 7 mmol), 120 °C, 8 h

```

=====
Acq. Operator   : SYSTEM                      Seq. Line : 19
Acq. Instrument : HPLC-DAD                   Location  : P1-B-03
Injection Date  : 12/22/2021 11:35:11 PM    Inj       : 1
                                           Inj Volume: 10.000 µl
Acq. Method     : D:\DATA\2021\Thang 12\22-12-Hang_Trinh_Ha\2021-12-22-HMF 2021-12-22 18-08-06\HMF_cot 150_hat_nho.M
Last changed    : 11/30/2021 8:55:26 PM by SYSTEM
Analysis Method : D:\METHOD\HMF_cot 150_hat_nho_285nmKQ.M
Last changed    : 12/25/2021 8:13:44 AM by SYSTEM
                 (modified after loading)
Additional Info : Peak(s) manually integrated
  
```

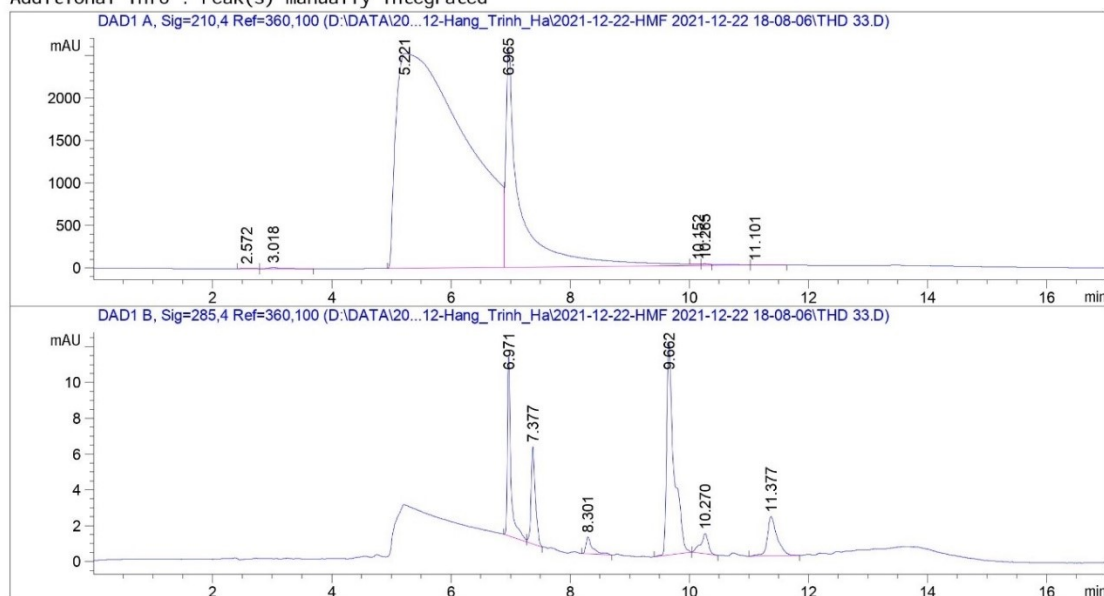

External Standard Report

```

Sorted By      : Signal
Calib. Data Modified : 12/24/2021 12:31:15 PM
Multiplier     : 1.0000
Dilution       : 1.0000
Do not use Multiplier & Dilution Factor with ISTDs
  
```

Signal 1: DAD1 A, Sig=210,4 Ref=360,100

Signal 2: DAD1 B, Sig=285,4 Ref=360,100

| RetTime [min] | Type | Area [mAU*s] | Amt/Area   | Amount [ppm] | Grp | Name           |
|---------------|------|--------------|------------|--------------|-----|----------------|
| 8.900         | -    | -            | -          | -            | -   | Levulinic acid |
| 9.662         | BB   | 101.44781    | 5.72090e-3 | 5.80373e-1   | -   | HMF            |
| 10.270        | BB   | 10.05096     | 4.25185e-2 | 4.27351e-1   | -   | DFF            |

Fig. S11 Reaction conditions: Cellulose (162 mg), C-H<sub>2</sub>SO<sub>4</sub> (5 mg), [EMIM]Cl (1 g, 7 mmol), 120 °C, 2 h

```

=====
Acq. Operator   : SYSTEM                      Seq. Line : 24
Acq. Instrument : HPLC-DAD                   Location  : P1-B-08
Injection Date  : 12/23/2021 1:05:36 AM      Inj       : 1
                                           Inj Volume: 10.000 µl

Acq. Method    : D:\DATA\2021\Thang 12\22-12-Hang_Trinh_Ha\2021-12-22-HMF 2021-12-22 18-08-06\HMF_cot 150_hat nho.M
Last changed   : 11/30/2021 8:55:26 PM by SYSTEM
Analysis Method: D:\METHOD\HMF_cot 150_hat nho_285nmKQ.M
Last changed   : 12/25/2021 8:13:44 AM by SYSTEM
                (modified after loading)
  
```

Additional Info : Peak(s) manually integrated

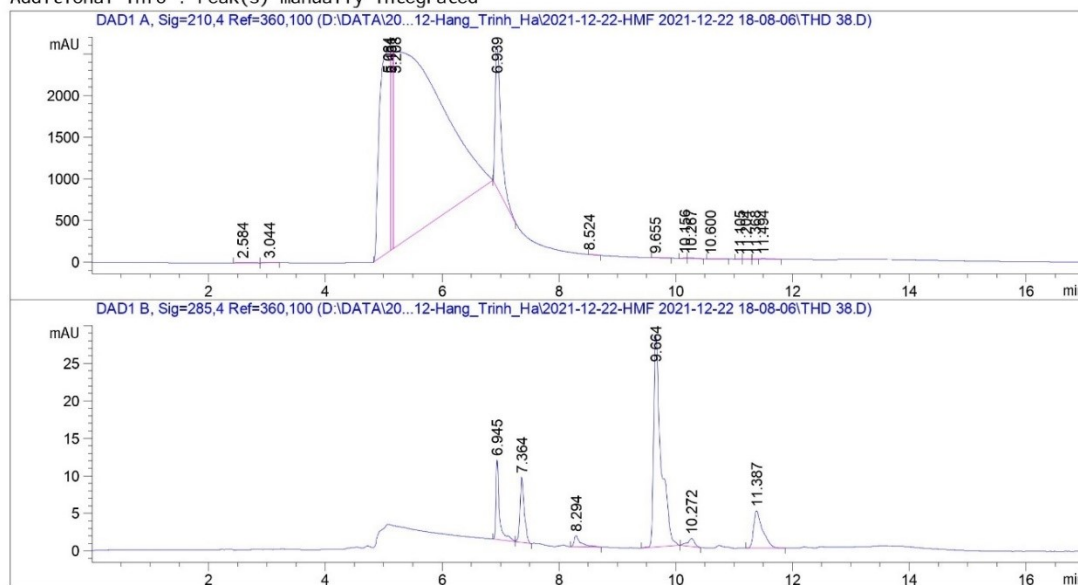

External Standard Report

```

Sorted By       : Signal
Calib. Data Modified : 12/24/2021 12:31:15 PM
Multiplier      : 1.0000
Dilution        : 1.0000
Do not use Multiplier & Dilution Factor with ISTDs
  
```

Signal 1: DAD1 A, Sig=210,4 Ref=360,100

Signal 2: DAD1 B, Sig=285,4 Ref=360,100

| RetTime [min] | Type | Area [mAU*s] | Amt/Area   | Amount [ppm] | Grp | Name           |
|---------------|------|--------------|------------|--------------|-----|----------------|
| 8.900         | -    | -            | -          | -            | -   | Levulinic acid |
| 9.664         | BB   | 246.81752    | 8.03470e-3 | 1.98310      | -   | HMF            |
| 10.272        | BB   | 8.79326      | 4.71121e-2 | 4.14269e-1   | -   | DFF            |

Fig. S12 Reaction conditions: Cellulose (162 mg), C-H<sub>2</sub>SO<sub>4</sub> (5 mg), [EMIM]Cl (1 g, 7 mmol), 120 °C, 4 h



```

=====
Acq. Operator   : SYSTEM                               Seq. Line : 29
Acq. Instrument : HPLC-DAD                           Location  : P1-C-04
Injection Date  : 12/23/2021 2:36:00 AM              Inj       : 1
                                                    Inj Volume: 10.000 µl
Acq. Method    : D:\DATA\2021\Thang 12\22-12-Hang_Trinh_Ha\2021-12-22-HMF 2021-12-22 18-08-06\HMF_cot 150_hat_nho.M
Last changed   : 11/30/2021 8:55:26 PM by SYSTEM
Analysis Method: D:\METHOD\HMF_cot 150_hat_nho_285nmKQ.M
Last changed   : 12/25/2021 8:13:44 AM by SYSTEM
                (modified after loading)
Additional Info : Peak(s) manually integrated
  
```

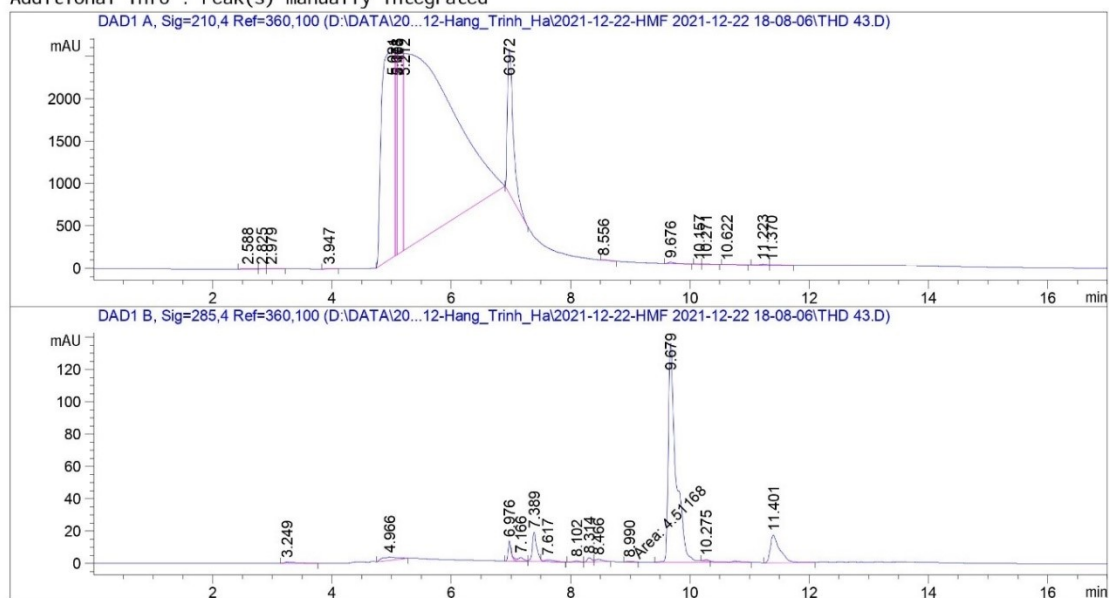

External Standard Report

```

Sorted By      : Signal
Calib. Data Modified : 12/24/2021 12:31:15 PM
Multiplier    : 1.0000
Dilution      : 1.0000
Do not use Multiplier & Dilution Factor with ISTDs
  
```

Signal 1: DAD1 A, Sig=210,4 Ref=360,100

Signal 2: DAD1 B, Sig=285,4 Ref=360,100

| RetTime [min] | Type | Area [mAU*s] | Amt/Area   | Amount [ppm] | Grp | Name           |
|---------------|------|--------------|------------|--------------|-----|----------------|
| 8.990         | MM   | 4.51168      | 21.37944   | 96.45719     |     | Levulinic acid |
| 9.679         | BV R | 1224.64502   | 9.32398e-3 | 11.41856     |     | HMF            |
| 10.275        | W E  | 3.41352      | 1.04968e-1 | 3.58310e-1   |     | DFF            |

Fig. S13 Reaction conditions: Cellulose (162 mg), C-H<sub>2</sub>SO<sub>4</sub> (5 mg), [EMIM]Cl (1 g, 7 mmol), 120 °C, 8 h

```

=====
Acq. Operator   : SYSTEM                               Seq. Line :   39
Acq. Instrument : HPLC-DAD                           Location  : P1-D-05
Injection Date  : 12/23/2021 5:37:02 AM              Inj       :    1
                                                    Inj Volume: 10.000 µl
Acq. Method     : D:\DATA\2021\Thang 12\22-12-Hang_Trinh_Ha\2021-12-22-HMF 2021-12-22 18-08-06\HMF_cot 150_hat_nho.M
Last changed    : 11/30/2021 8:55:26 PM by SYSTEM
Analysis Method : D:\METHOD\HMF_cot 150_hat_nho_KQ.M
Last changed    : 12/25/2021 8:42:31 AM by SYSTEM
                (modified after loading)
Additional Info : Peak(s) manually integrated
  
```

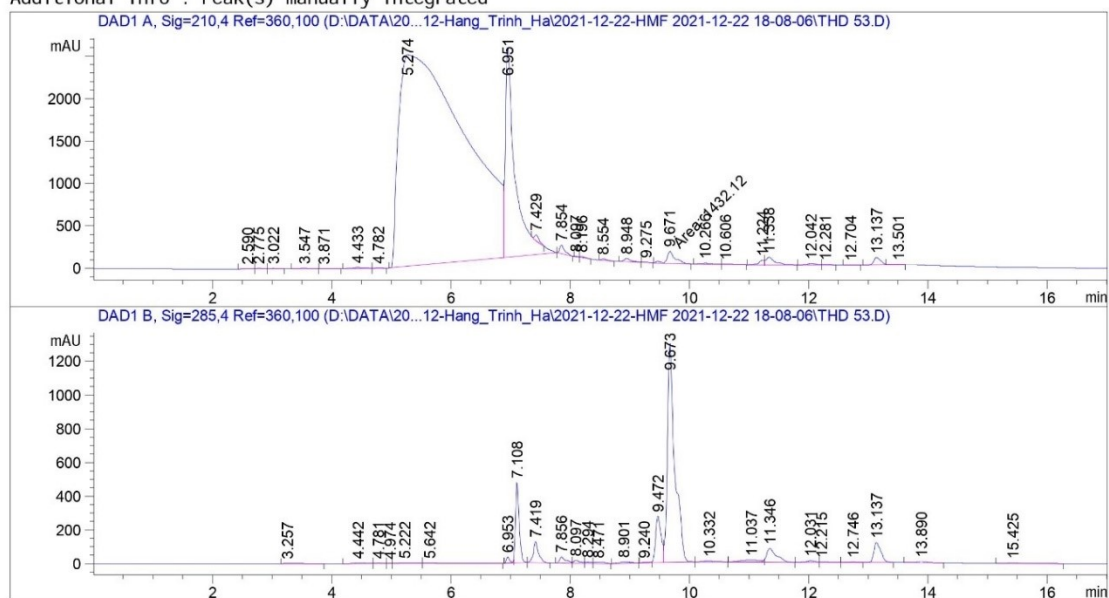

External Standard Report

```

Sorted By      : Signal
Calib. Data Modified : 12/25/2021 8:42:31 AM
Multiplier     : 1.0000
Dilution       : 1.0000
Do not use Multiplier & Dilution Factor with ISTDs
  
```

Signal 1: DAD1 A, Sig=210,4 Ref=360,100

| RetTime [min] | Type | Area [mAU*s] | Amt/Area   | Amount [ppm] | Grp | Name           |
|---------------|------|--------------|------------|--------------|-----|----------------|
| 3.547         | BB   | 56.87122     | 1.37165    | 78.00723     |     | Formic acid    |
| 8.948         | BB   | 314.83707    | 3.45110    | 1086.53394   |     | Levulinic acid |
| 9.671         | MM   | 1432.12354   | 1.22793e-1 | 175.85410    |     | HMF            |
| 10.266        | BV   | 134.95773    | 4.38406e-2 | 5.91663      |     | DFF            |
| 11.224        | BV   | 320.09885    | 1.91485e-1 | 61.29417     |     | FDCA           |
| 11.338        | VB   | 918.29266    | 1.05686e-1 | 97.05022     |     | Furfural       |

Fig. S14 Reaction conditions: Cellulose (162 mg), C-H<sub>2</sub>SO<sub>4</sub> (5 mg), [EMIM]Cl (1 g, 7 mmol), 120 °C, 18 h

```

=====
Acq. Operator   : SYSTEM                      Seq. Line :   34
Acq. Instrument : HPLC-DAD                    Location  : P1-C-09
Injection Date  : 12/23/2021 4:06:28 AM      Inj       :    1
                                           Inj Volume: 10.000 µl
Acq. Method     : D:\DATA\2021\Thang 12\22-12-Hang_Trinh_Ha\2021-12-22-HMF 2021-12-22 18-08-06\HMF_cot 150_hat nho.M
Last changed    : 11/30/2021 8:55:26 PM by SYSTEM
Analysis Method : D:\METHOD\HMF_cot 150_hat nho_KQ.M
Last changed    : 12/24/2021 12:53:59 PM by SYSTEM
Additional Info  : Peak(s) manually integrated
  
```

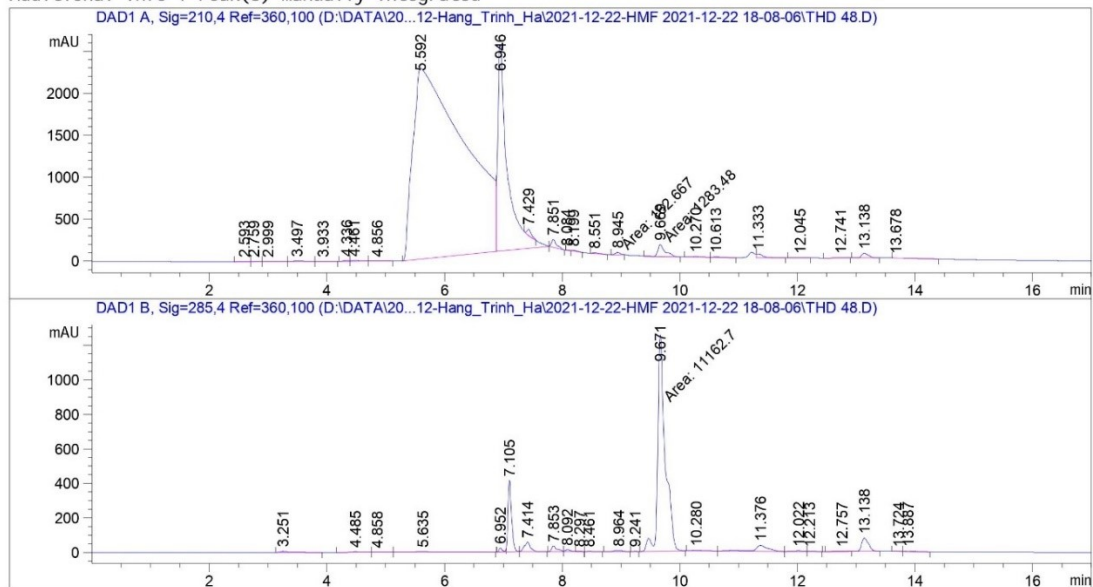

External Standard Report

```

Sorted By      : Signal
Calib. Data Modified : 12/24/2021 12:50:07 PM
Multiplier     : 1.0000
Dilution       : 1.0000
Do not use Multiplier & Dilution Factor with ISTDs
  
```

Signal 1: DAD1 A, Sig=210,4 Ref=360,100

| RetTime [min] | Type | Area [mAU*s] | Amt/Area   | Amount [ppm] | Grp | Name           |
|---------------|------|--------------|------------|--------------|-----|----------------|
| 3.933         | BB   | 28.39203     | 1.46844    | 41.69195     |     | Formic acid    |
| 8.945         | MM   | 162.66745    | 3.46775    | 564.08925    |     | Levulinic acid |
| 9.669         | MM   | 1283.47937   | 1.22679e-1 | 157.45618    |     | HMF            |
| 10.270        | BV   | 105.92078    | 3.89380e-2 | 4.12434      |     | DFF            |
| 11.000        |      | -            | -          | -            |     | FDCA           |
| 11.333        | VB   | 386.09171    | 1.04626e-1 | 40.39506     |     | Furfural       |

Fig. S15 Reaction conditions: Cellulose (162 mg), C-H<sub>2</sub>SO<sub>4</sub> (5 mg), [EMIM]Cl (1 g, 7 mmol), 120 °C, 24 h



```

=====
Acq. Operator   : SYSTEM                               Seq. Line : 20
Acq. Instrument : HPLC-DAD                             Location  : P1-B-04
Injection Date  : 12/22/2021 11:53:15 PM              Inj       : 1
                                                    Inj Volume: 10.000 µl
Acq. Method    : D:\DATA\2021\Thang 12\22-12-Hang_Trinh_Ha\2021-12-22-HMF 2021-12-22 18-08-06\HMF_cot 150_hat_nho.M
Last changed   : 11/30/2021 8:55:26 PM by SYSTEM
Analysis Method: D:\METHOD\HMF_cot 150_hat_nho_285nmKQ.M
Last changed   : 12/25/2021 8:13:44 AM by SYSTEM
                (modified after loading)
  
```

Additional Info : Peak(s) manually integrated

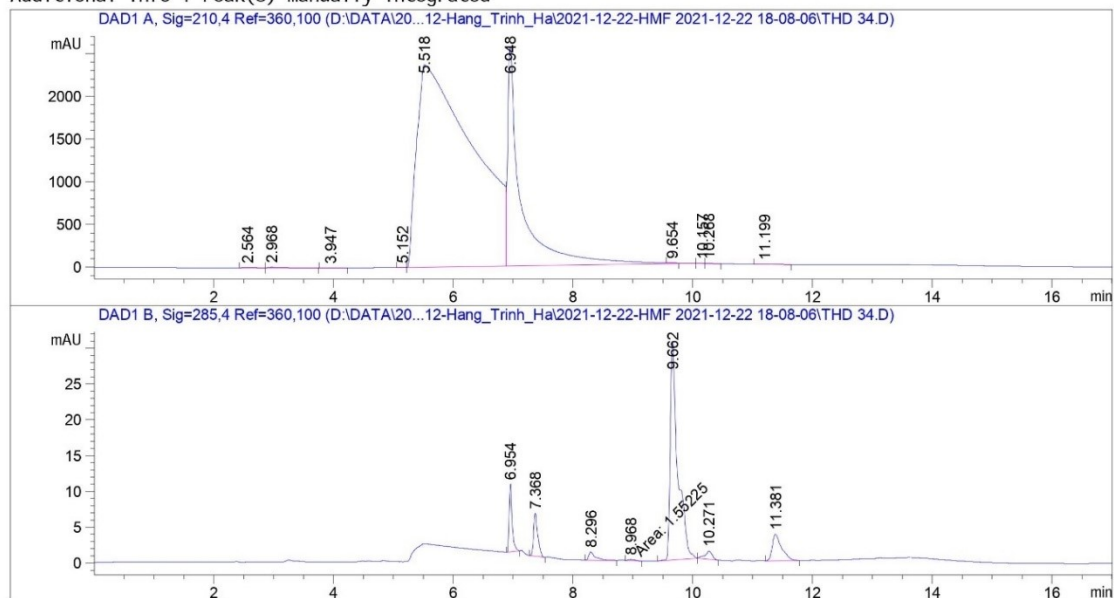

External Standard Report

```

Sorted By      : Signal
Calib. Data Modified : 12/24/2021 12:31:15 PM
Multiplier     : 1.0000
Dilution       : 1.0000
Do not use Multiplier & Dilution Factor with ISTDs
  
```

Signal 1: DAD1 A, Sig=210,4 Ref=360,100

Signal 2: DAD1 B, Sig=285,4 Ref=360,100

| RetTime [min] | Type | Area [mAU*s] | Amt/Area   | Amount [ppm] | Grp | Name           |
|---------------|------|--------------|------------|--------------|-----|----------------|
| 8.968         | MM   | 1.55225      | 26.37124   | 40.93476     |     | Levulinic acid |
| 9.662         | BB   | 265.79782    | 8.15000e-3 | 2.16625      |     | HMF            |
| 10.271        | BB   | 9.38301      | 4.48048e-2 | 4.20403e-1   |     | DFF            |

Fig. S16 Reaction conditions: Cellulose (162 mg), C-H<sub>2</sub>SO<sub>4</sub> (8 mg), [EMIM]Cl (1 g, 7 mmol), 120 °C, 2 h

```

=====
Acq. Operator   : SYSTEM                      Seq. Line :   30
Acq. Instrument : HPLC-DAD                    Location  : P1-C-05
Injection Date  : 12/23/2021 2:54:07 AM      Inj       :    1
                                           Inj Volume: 10.000 µl
Acq. Method     : D:\DATA\2021\Thang 12\22-12-Hang_Trinh_Ha\2021-12-22-HMF 2021-12-22 18-08-06\HMF_cot 150_hat nho.M
Last changed    : 11/30/2021 8:55:26 PM by SYSTEM
Analysis Method : D:\METHOD\HMF_cot 150_hat nho_KQ.M
Last changed    : 12/25/2021 7:56:56 AM by SYSTEM
                (modified after loading)
Additional Info : Peak(s) manually integrated
  
```

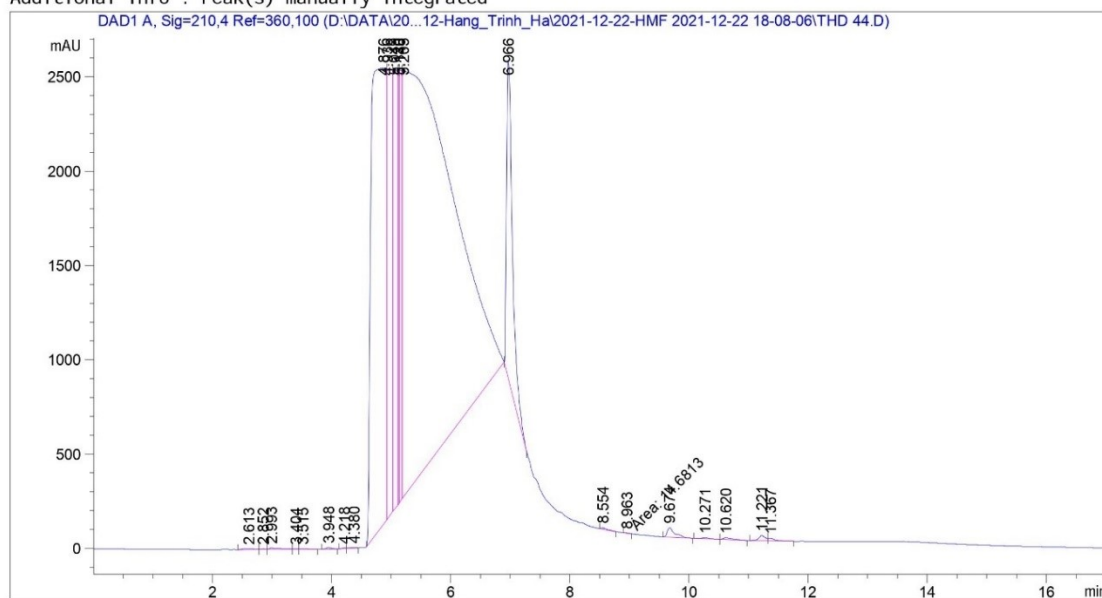

External Standard Report

```

Sorted By      : Signal
Calib. Data Modified : 12/24/2021 12:50:07 PM
Multiplier     : 1.0000
Dilution       : 1.0000
Do not use Multiplier & Dilution Factor with ISTDs
  
```

Signal 1: DAD1 A, Sig=210,4 Ref=360,100

| RetTime [min] | Type | Area [mAU*s] | Amt/Area   | Amount [ppm] | Grp | Name           |
|---------------|------|--------------|------------|--------------|-----|----------------|
| 3.948         | BB   | 55.71623     | 1.37365    | 76.53443     |     | Formic acid    |
| 8.963         | MM   | 14.68128     | 3.81490    | 56.00760     |     | Levulinic acid |
| 9.674         | BB   | 442.31339    | 1.20602e-1 | 53.34378     |     | HMF            |
| 10.271        | BV   | 47.69740     | 1.11230e-2 | 5.30540e-1   |     | DFE            |
| 11.221        | BV   | 216.30983    | 1.86693e-1 | 40.38347     |     | FDCA           |
| 11.367        | VB   | 109.97086    | 1.00033e-1 | 11.00076     |     | Furfural       |

Fig. S17 Reaction conditions: Cellulose (162 mg), C-H<sub>2</sub>SO<sub>4</sub> (8 mg), [EMIM]Cl (1 g, 7 mmol), 120 °C, 8 h

```

=====
Acq. Operator   : SYSTEM                               Seq. Line :   40
Acq. Instrument : HPLC-DAD                           Location  : P1-D-06
Injection Date  : 12/23/2021 5:55:08 AM              Inj       :    1
                                                    Inj Volume: 10.000 µl
Acq. Method     : D:\DATA\2021\Thang 12\22-12-Hang_Trinh_Ha\2021-12-22-HMF 2021-12-22 18-08-06\HMF_cot 150_hat nho.M
Last changed    : 11/30/2021 8:55:26 PM by SYSTEM
Analysis Method : D:\METHOD\HMF_cot 150_hat nho_KQ.M
Last changed    : 12/24/2021 12:53:59 PM by SYSTEM
Additional Info  : Peak(s) manually integrated
  
```

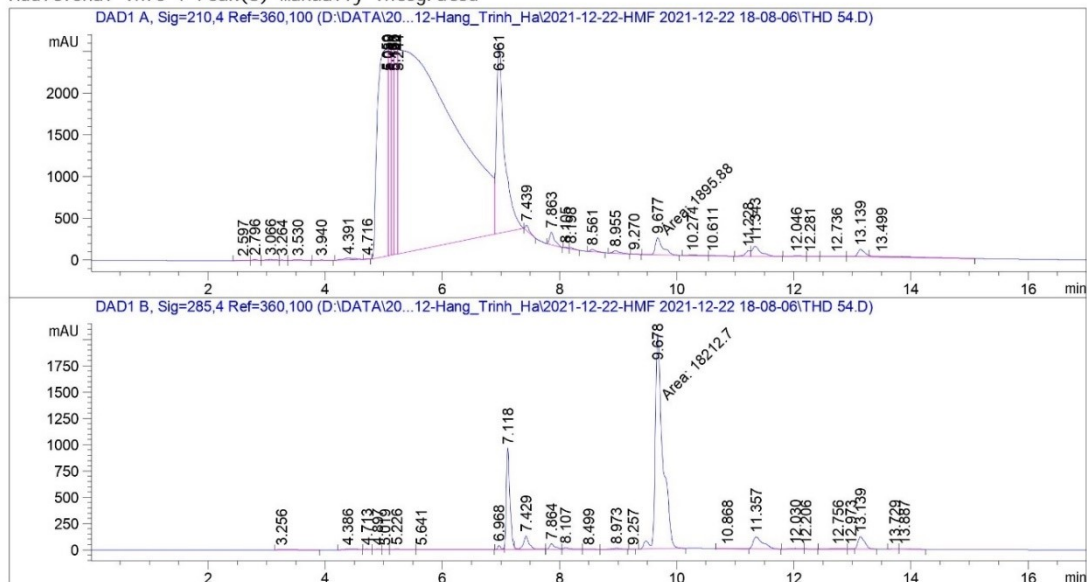

External Standard Report

```

Sorted By      : Signal
Calib. Data Modified : 12/24/2021 12:50:07 PM
Multiplier     : 1.0000
Dilution      : 1.0000
Do not use Multiplier & Dilution Factor with ISTDs
  
```

Signal 1: DAD1 A, Sig=210,4 Ref=360,100

| RetTime [min] | Type | Area [mAU*s] | Amt/Area   | Amount [ppm] | Grp | Name           |
|---------------|------|--------------|------------|--------------|-----|----------------|
| 3.940         | BB   | 49.03071     | 1.38708    | 68.00939     |     | Formic acid    |
| 8.955         | BB   | 251.40234    | 3.45559    | 868.74319    |     | Levulinic acid |
| 9.677         | MM   | 1895.88464   | 1.23032e-1 | 233.25452    |     | HMF            |
| 10.274        | BV   | 120.45092    | 4.16867e-2 | 5.02121      |     | DFF            |
| 11.228        | BV   | 374.92627    | 1.92946e-1 | 72.34043     |     | FDCA           |
| 11.343        | VB   | 1244.90039   | 1.05887e-1 | 131.81907    |     | Furfural       |

Fig. S18 Reaction conditions: Cellulose (162 mg), C-H<sub>2</sub>SO<sub>4</sub> (8 mg), [EMIM]Cl (1 g, 7 mmol), 120 °C, 24 h

```

=====
Acq. Operator   : SYSTEM                      Seq. Line : 26
Acq. Instrument : HPLC-DAD                    Location  : P1-C-01
Injection Date  : 12/23/2021 1:41:42 AM      Inj       : 1
                                           Inj Volume: 10.000 µl
Acq. Method    : D:\DATA\2021\Thang 12\22-12-Hang_Trinh_Ha\2021-12-22-HMF 2021-12-22 18-08-06\HMF_cot 150_hat_nho.M
Last changed   : 11/30/2021 8:55:26 PM by SYSTEM
Analysis Method: D:\METHOD\HMF_cot 150_hat_nho_285nmKQ.M
Last changed   : 12/25/2021 8:32:10 AM by SYSTEM
Additional Info: Peak(s) manually integrated
  
```

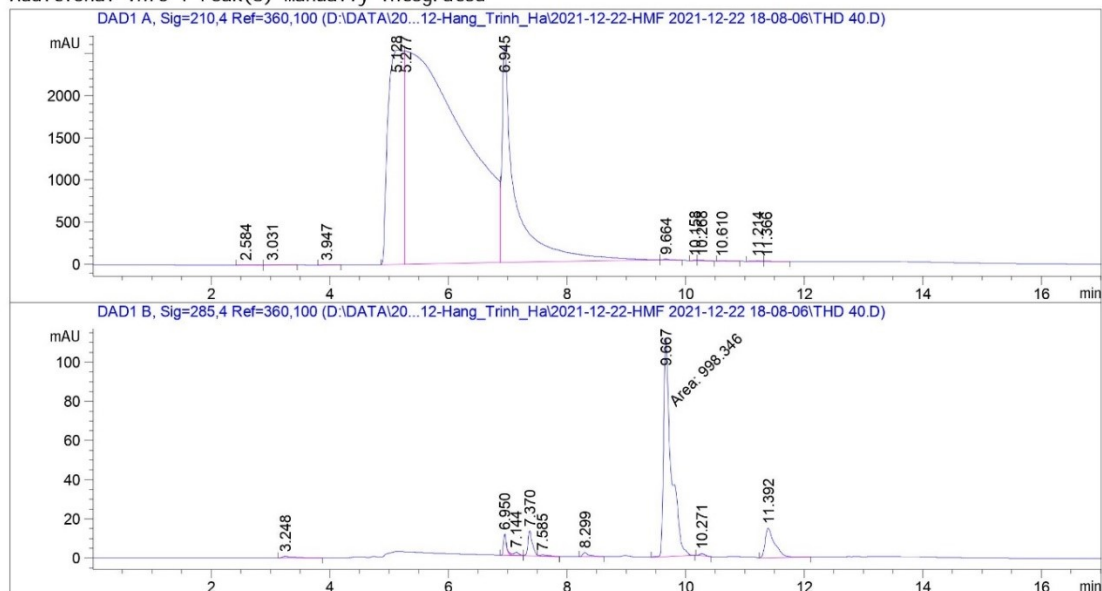

External Standard Report

```

=====
Sorted By      : Signal
Calib. Data Modified : 12/24/2021 12:31:15 PM
Multiplier     : 1.0000
Dilution       : 1.0000
Do not use Multiplier & Dilution Factor with ISTDs
  
```

Signal 1: DAD1 A, Sig=210,4 Ref=360,100

Signal 2: DAD1 B, Sig=285,4 Ref=360,100

| RetTime [min] | Type | Area [mAU*s] | Amt/Area   | Amount [ppm] | Grp | Name           |
|---------------|------|--------------|------------|--------------|-----|----------------|
| 8.900         | -    | -            | -          | -            | -   | Levulinic acid |
| 9.667         | MM   | 998.34619    | 9.25021e-3 | 9.23491      | -   | HMF            |
| 10.271        | BB   | 7.48978      | 5.35010e-2 | 4.00710e-1   | -   | DFF            |
| 11.097        | -    | -            | -          | -            | -   | FDCA           |

Fig. S19 Reaction conditions: Cellulose (162 mg), C-H<sub>2</sub>SO<sub>4</sub> (10 mg), [EMIM]Cl (1 g, 7 mmol), 120 °C, 2 h

```

=====
Acq. Operator   : SYSTEM                      Seq. Line : 31
Acq. Instrument : HPLC-DAD                    Location  : P1-C-06
Injection Date  : 12/23/2021 3:12:12 AM      Inj       : 1
                                           Inj Volume: 10.000 µl
Acq. Method    : D:\DATA\2021\Thang 12\22-12-Hang_Trinh_Ha\2021-12-22-HMF 2021-12-22 18-08-06\HMF_cot 150_hat nho.M
Last changed   : 11/30/2021 8:55:26 PM by SYSTEM
Analysis Method : D:\METHOD\HMF_cot 150_hat nho_285nmKQ.M
Last changed   : 12/25/2021 8:32:10 AM by SYSTEM
=====
  
```

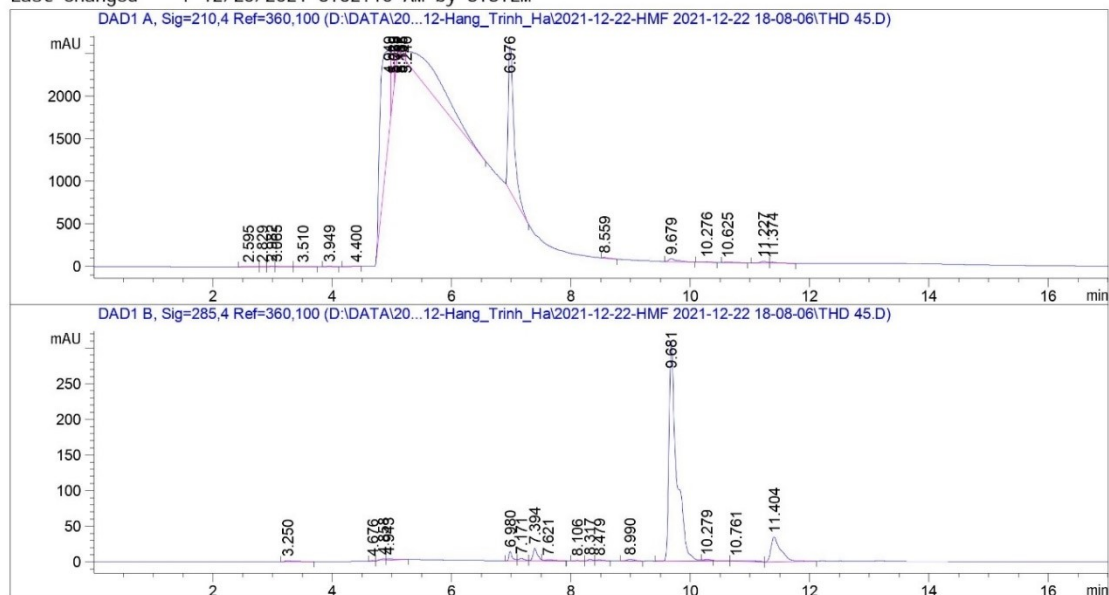

External Standard Report

```

Sorted By      : Signal
Calib. Data Modified : 12/24/2021 12:31:15 PM
Multiplier     : 1.0000
Dilution      : 1.0000
Do not use Multiplier & Dilution Factor with ISTDs
  
```

Signal 1: DAD1 A, Sig=210,4 Ref=360,100

Signal 2: DAD1 B, Sig=285,4 Ref=360,100

| RetTime [min] | Type | Area [mAU*s] | Amt/Area   | Amount [ppm] | Grp | Name           |
|---------------|------|--------------|------------|--------------|-----|----------------|
| 8.990         | BB   | 18.83726     | 19.38829   | 365.22223    |     | Levulinic acid |
| 9.681         | BV R | 2771.14087   | 9.50559e-3 | 26.34133     |     | HMF            |
| 10.279        | VB E | 7.83917      | 5.15801e-2 | 4.04345e-1   |     | DFF            |
| 11.097        |      | -            | -          | -            |     | FDCA           |
| 11.404        | BB   | 393.99500    | 9.58128e-3 | 3.77498      |     | Furfural       |

Fig. S20 Reaction conditions: Cellulose (162 mg), C-H<sub>2</sub>SO<sub>4</sub> (10 mg), [EMIM]Cl (1 g, 7 mmol), 120 °C, 8 h



```

=====
Acq. Operator   : SYSTEM                               Seq. Line : 41
Acq. Instrument : HPLC-DAD                           Location  : P1-D-07
Injection Date  : 12/23/2021 6:13:12 AM              Inj       : 1
                                                    Inj Volume: 10.000 µl
Acq. Method    : D:\DATA\2021\Thang 12\22-12-Hang_Trinh_Ha\2021-12-22-HMF 2021-12-22 18-08-06\HMF_cot 150_hat_nho.M
Last changed   : 11/30/2021 8:55:26 PM by SYSTEM
Analysis Method: D:\METHOD\HMF_cot 150_hat_nho_K0.M
Last changed   : 2/16/2022 7:16:27 AM by SYSTEM
Additional Info: Peak(s) manually integrated
  
```

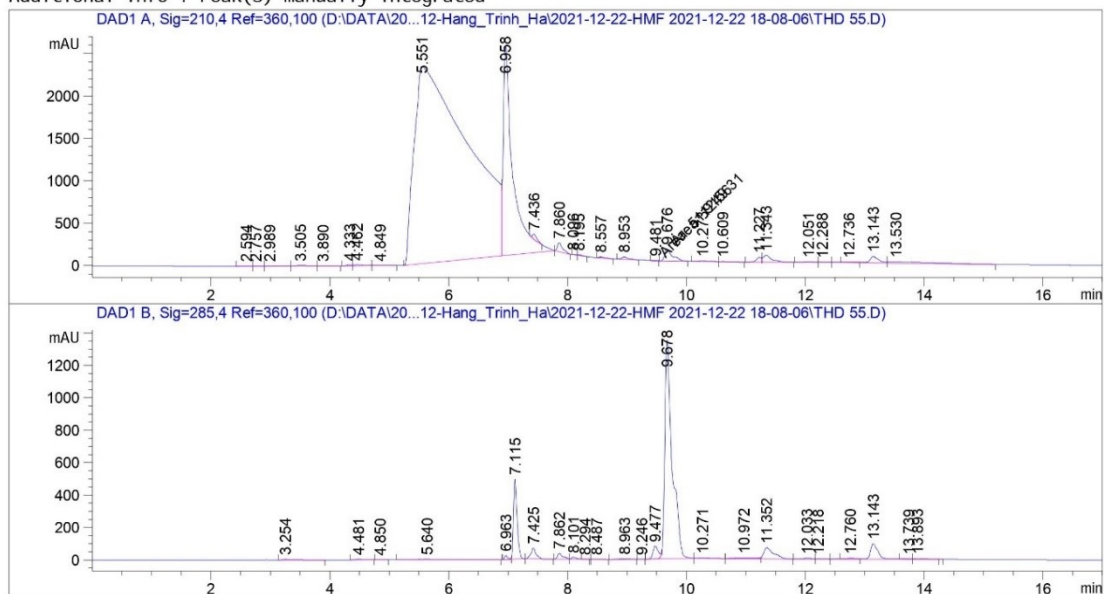

External Standard Report

```

Sorted By      : Signal
Calib. Data Modified : 2/16/2022 7:15:21 AM
Multiplier     : 1.0000
Dilution      : 1.0000
Do not use Multiplier & Dilution Factor with ISTDs
  
```

Signal 1: DAD1 A, Sig=210,4 Ref=360,100

| RetTime [min] | Type | Area [mAU*s] | Amt/Area   | Amount [ppm] | Grp | Name           |
|---------------|------|--------------|------------|--------------|-----|----------------|
| 3.600         | -    | -            | -          | -            | -   | Formic acid    |
| 8.953         | BB   | 234.29135    | 3.45722    | 809.99594    | -   | Levulinic acid |
| 9.676         | MM   | 1249.30554   | 1.22649e-1 | 153.22644    | -   | HMF            |
| 10.273        | BV   | 114.16457    | 4.05834e-2 | 4.63318      | -   | DFF            |
| 11.227        | BV   | 349.16763    | 1.92317e-1 | 67.15076     | -   | FDCA           |
| 11.343        | VB   | 826.29462    | 1.05600e-1 | 87.25662     | -   | Furfural       |

Fig. S21 Reaction conditions: Cellulose (162 mg), C-H<sub>2</sub>SO<sub>4</sub> (10 mg), [EMIM]Cl (1 g, 7 mmol), 120 °C, 24 h

```

=====
Acq. Operator   : SYSTEM                      Seq. Line : 22
Acq. Instrument : HPLC-DAD                    Location  : P1-B-06
Injection Date  : 12/23/2021 12:29:27 AM      Inj       : 1
                                           Inj Volume: 10.000 µl
Acq. Method    : D:\DATA\2021\Thang 12\22-12-Hang_Trinh_Ha\2021-12-22-HMF 2021-12-22 18-08-06\HMF_cot_150_hat_nho.M
Last changed   : 11/30/2021 8:55:26 PM by SYSTEM
Analysis Method: D:\METHOD\HMF_cot_150_hat_nho_KQ.M
Last changed   : 12/25/2021 12:53:04 PM by SYSTEM
=====
  
```

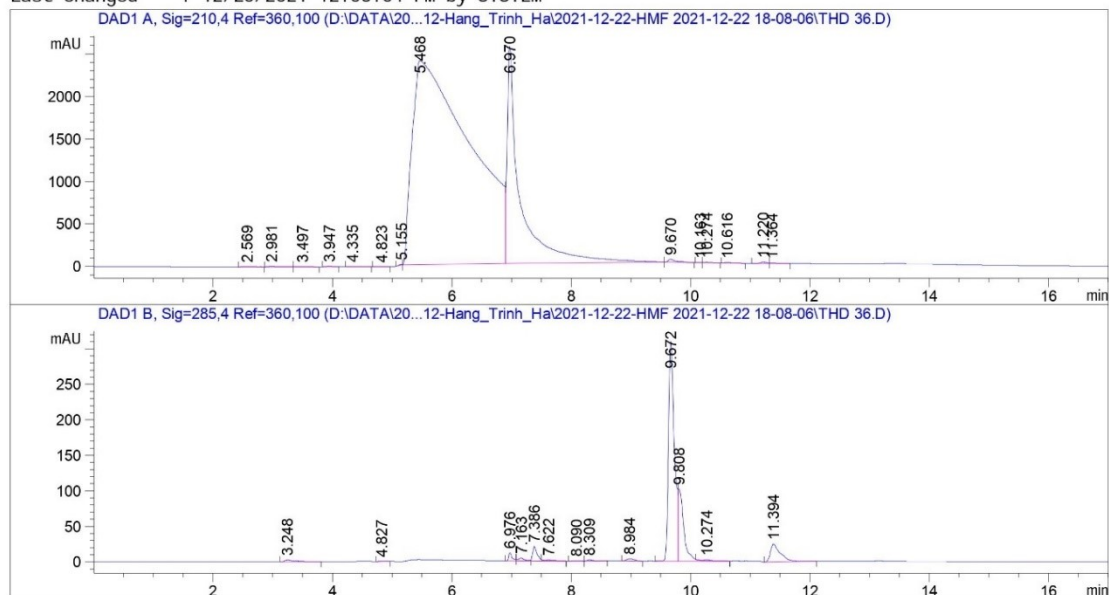

External Standard Report

```

Sorted By      : Signal
Calib. Data Modified : 12/25/2021 8:45:54 AM
Multiplier     : 1.0000
Dilution      : 1.0000
Do not use Multiplier & Dilution Factor with ISTDs
  
```

Signal 1: DAD1 A, Sig=210,4 Ref=360,100

| RetTime [min] | Type | Area [mAU*s] | Amt/Area   | Amount [ppm] | Grp | Name           |
|---------------|------|--------------|------------|--------------|-----|----------------|
| 3.497         | VB   | 26.98970     | 1.47848    | 39.90377     |     | Formic acid    |
| 8.900         |      | -            | -          | -            |     | Levulinic acid |
| 9.670         | BB   | 298.25464    | 1.19071e-1 | 35.51341     |     | HMF            |
| 10.274        | VB   | 37.11110     | 0.00000    | 0.00000      |     | DFF            |
| 11.220        | BV   | 114.08005    | 1.73448e-1 | 19.78690     |     | FDCA           |
| 11.364        | VB   | 64.50709     | 9.55080e-2 | 6.16094      |     | Furfural       |

Totals : 101.36502

Fig. S22 Reaction conditions: Cellulose (162 mg), C-H<sub>2</sub>SO<sub>4</sub> (20 mg), [EMIM]Cl (1 g, 7 mmol), 120 °C, 2 h

```

=====
Acq. Operator   : SYSTEM                      Seq. Line : 42
Acq. Instrument : HPLC-DAD                    Location  : P1-D-08
Injection Date  : 12/23/2021 6:31:18 AM      Inj       : 1
                                           Inj Volume: 10.000 µl
Acq. Method     : D:\DATA\2021\Thang 12\22-12-Hang_Trinh_Ha\2021-12-22-HMF 2021-12-22 18-08-06\HMF_cot 150_hat nho.M
Last changed    : 11/30/2021 8:55:26 PM by SYSTEM
Analysis Method : D:\METHOD\HMF_cot 150_hat nho_KQ.M
Last changed    : 12/25/2021 12:53:04 PM by SYSTEM
Additional Info : Peak(s) manually integrated
  
```

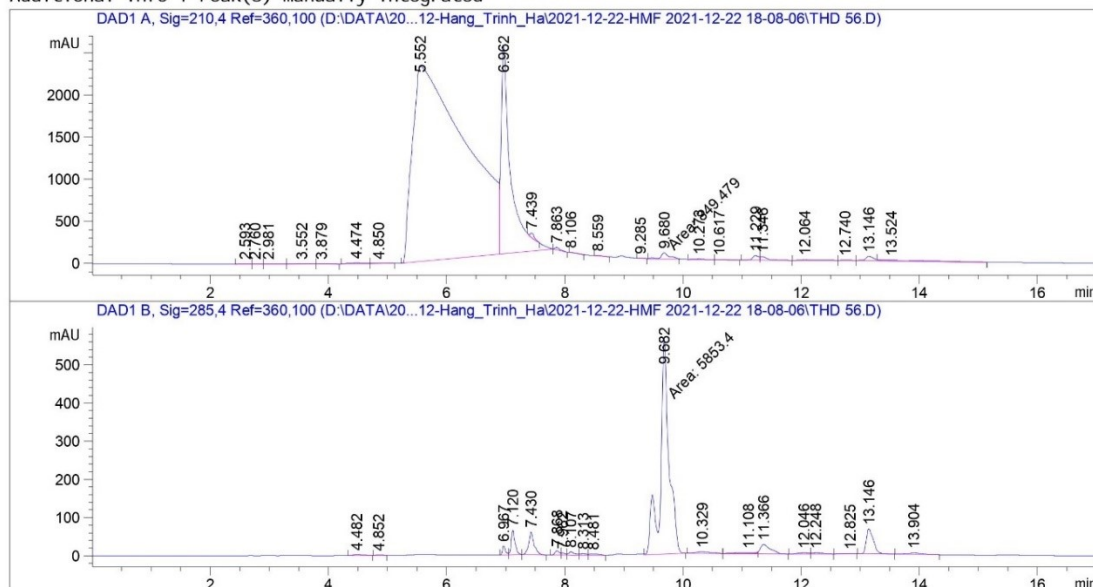

External Standard Report

```

Sorted By      : Signal
Calib. Data Modified : 12/25/2021 8:45:54 AM
Multiplier     : 1.0000
Dilution       : 1.0000
Do not use Multiplier & Dilution Factor with ISTDs
  
```

Signal 1: DAD1 A, Sig=210,4 Ref=360,100

| RetTime [min] | Type | Area [mAU*s] | Amt/Area   | Amount [ppm] | Grp | Name           |
|---------------|------|--------------|------------|--------------|-----|----------------|
| 3.552         | VB   | 64.69894     | 1.35997    | 87.98875     |     | Formic acid    |
| 8.900         |      | -            | -          | -            |     | Levulinic acid |
| 9.680         | MM   | 849.47888    | 1.22121e-1 | 103.73928    |     | HMF            |
| 10.273        | BV   | 94.66292     | 3.62281e-2 | 3.42946      |     | DFF            |
| 11.229        | BV   | 412.05844    | 1.93714e-1 | 79.82157     |     | FDCA           |
| 11.346        | VB   | 369.62128    | 1.04544e-1 | 38.64171     |     | Furfural       |

Fig. S23 Reaction conditions: Cellulose (162 mg), C-H<sub>2</sub>SO<sub>4</sub> (20 mg), [EMIM]Cl (1 g, 7 mmol), 120 °C, 4 h



```

=====
Acq. Operator   : SYSTEM                      Seq. Line : 37
Acq. Instrument : HPLC-DAD                   Location  : P1-D-03
Injection Date  : 12/23/2021 5:00:41 AM      Inj       : 1
                                           Inj Volume: 10.000 µl
Acq. Method     : D:\DATA\2021\Thang 12\22-12-Hang_Trinh_Ha\2021-12-22-HMF 2021-12-22 18-08-06\HMF_cot 150_hat nho.M
Last changed    : 11/30/2021 8:55:26 PM by SYSTEM
Analysis Method : D:\METHOD\HMF_cot 150_hat nho_KQ.M
Last changed    : 12/25/2021 8:42:31 AM by SYSTEM
                 (modified after loading)
Additional Info : Peak(s) manually integrated
  
```

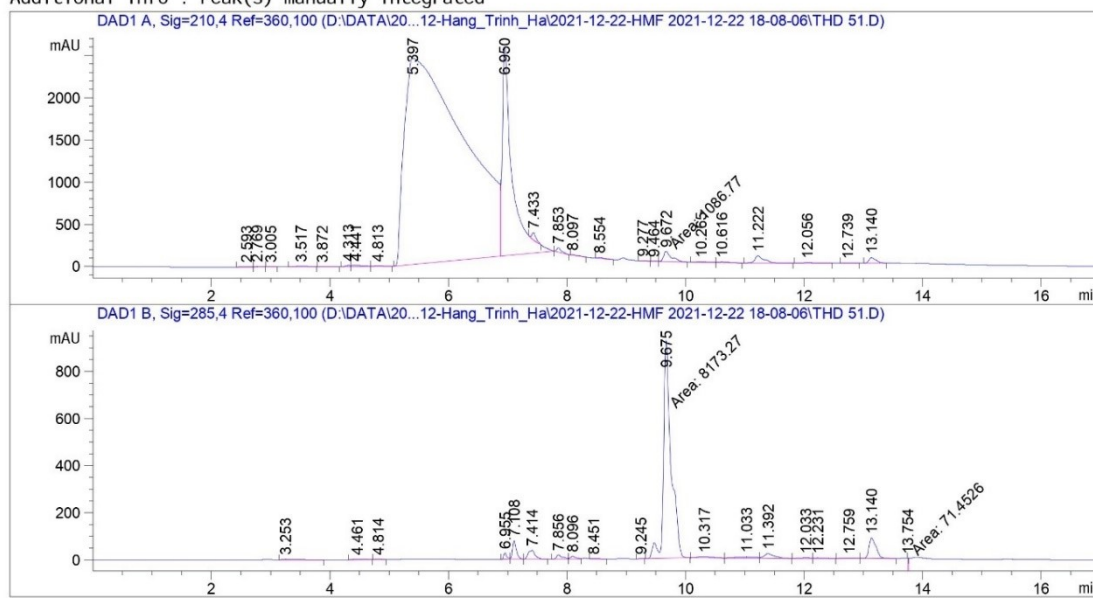

External Standard Report

```

Sorted By      : Signal
Calib. Data Modified : 12/25/2021 8:45:54 AM
Multiplier     : 1.0000
Dilution       : 1.0000
Do not use Multiplier & Dilution Factor with ISTDs
  
```

Signal 1: DAD1 A, Sig=210,4 Ref=360,100

| RetTime [min] | Type | Area [mAU*s] | Amt/Area   | Amount [ppm] | Grp | Name           |
|---------------|------|--------------|------------|--------------|-----|----------------|
| 3.517         | BB   | 106.36711    | 1.32674    | 141.12197    |     | Formic acid    |
| 8.900         |      | -            | -          | -            |     | Levulinic acid |
| 9.672         | MM   | 1086.77441   | 1.22481e-1 | 133.10971    |     | HMF            |
| 10.265        | BV   | 112.71876    | 4.03122e-2 | 4.54394      |     | DFF            |
| 11.000        |      | -            | -          | -            |     | FDCA           |
| 11.222        | BB   | 937.82098    | 1.05702e-1 | 99.12910     |     | Furfural       |

Fig. S24 Reaction conditions: Cellulose (162 mg), C-H<sub>2</sub>SO<sub>4</sub> (20 mg), [EMIM]Cl (1 g, 7 mmol), 120 °C, 8 h

```

=====
Acq. Operator   : SYSTEM                      Seq. Line : 27
Acq. Instrument : HPLC-DAD                   Location  : P1-C-02
Injection Date  : 12/23/2021 1:59:48 AM      Inj       : 1
                                           Inj Volume: 10.000 µl
Acq. Method    : D:\DATA\2021\Thang 12\22-12-Hang_Trinh_Ha\2021-12-22-HMF 2021-12-22 18-08-06\HMF_cot 150_hat_nho.M
Last changed   : 11/30/2021 8:55:26 PM by SYSTEM
Analysis Method : D:\METHOD\HMF_cot 150_hat_nho_KQ.M
Last changed   : 12/25/2021 12:53:04 PM by SYSTEM
Additional Info : Peak(s) manually integrated
  
```

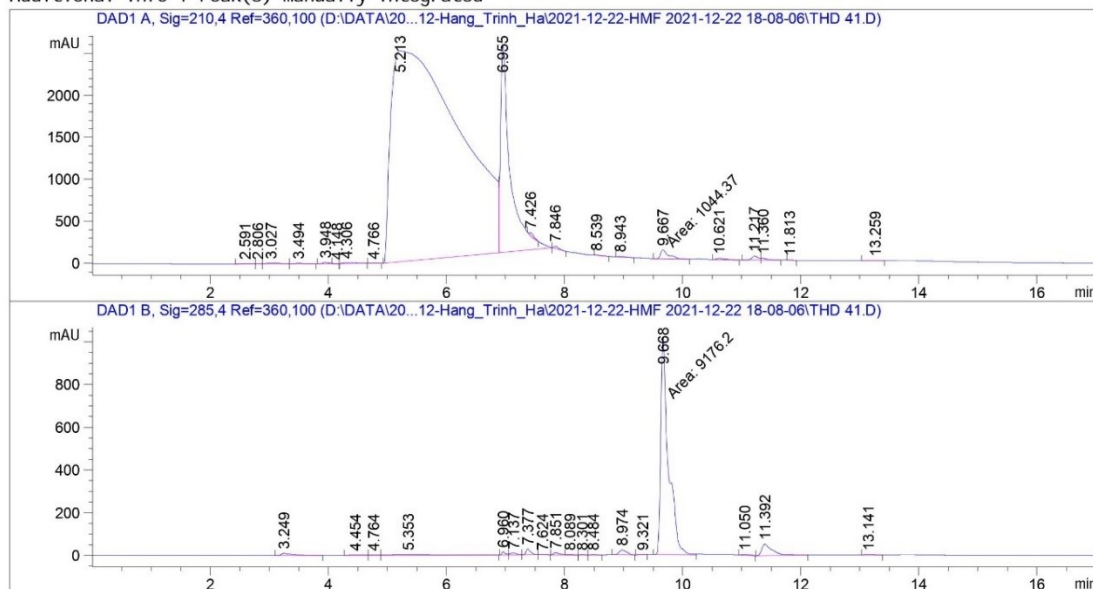

External Standard Report

```

Sorted By      : Signal
Calib. Data Modified : 12/25/2021 8:45:54 AM
Multiplier     : 1.0000
Dilution       : 1.0000
Do not use Multiplier & Dilution Factor with ISTDs
  
```

Signal 1: DAD1 A, Sig=210,4 Ref=360,100

| RetTime [min] | Type | Area [mAU*s] | Amt/Area   | Amount [ppm] | Grp | Name           |
|---------------|------|--------------|------------|--------------|-----|----------------|
| 3.494         | VB   | 78.44407     | 1.34511    | 105.51587    |     | Formic acid    |
| 8.943         | BB   | 67.60327     | 3.51617    | 237.70493    |     | Levulinic acid |
| 9.667         | MM   | 1044.37085   | 1.22429e-1 | 127.86136    |     | HMF            |
| 10.621        | VB   | 180.04453    | 4.83191e-2 | 8.69958      |     | DFF            |
| 11.217        | BV   | 363.77826    | 1.92684e-1 | 70.09441     |     | FDCA           |
| 11.360        | VB   | 168.61162    | 1.02267e-1 | 17.24333     |     | Furfural       |

Fig. S25 Reaction conditions: Cellulose (162 mg), C-H<sub>2</sub>SO<sub>4</sub> (20 mg), [EMIM]Cl (1 g, 7 mmol), 120 °C, 18 h

```

=====
Acq. Operator   : SYSTEM                      Seq. Line :   47
Acq. Instrument : HPLC-DAD                   Location  : P1-E-04
Injection Date  : 12/26/2021 6:57:47 AM      Inj       :    1
                                           Inj Volume: 10.000 µl
Acq. Method    : D:\DATA\2021\Thang 12\25-12-Hang_Trinh_Ha\2021-12-25-HMF 2021-12-25 17-04-50\HMF_cot 150_hat_nho.M
Last changed   : 11/30/2021 8:55:26 PM by SYSTEM
Analysis Method: D:\METHOD\HMF_cot 150_hat_nho_285nmKQ.M
Last changed   : 12/29/2021 10:03:33 PM by SYSTEM
  
```

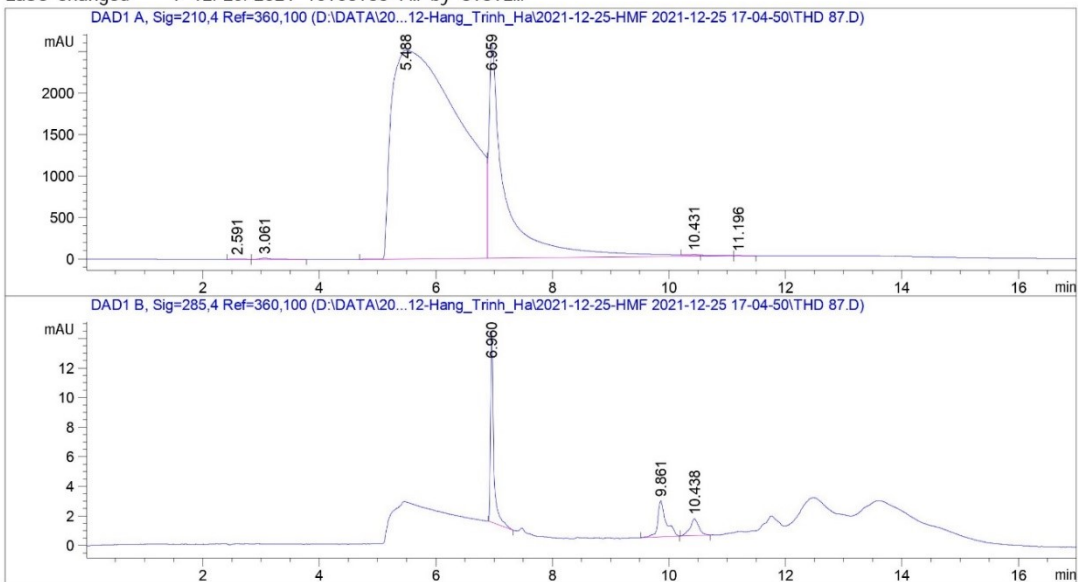

External Standard Report

```

Sorted By      : Signal
Calib. Data Modified : 12/29/2021 10:00:38 PM
Multiplier     : 1.0000
Dilution      : 1.0000
Do not use Multiplier & Dilution Factor with ISTDs
  
```

Signal 1: DAD1 A, Sig=210,4 Ref=360,100

Signal 2: DAD1 B, Sig=285,4 Ref=360,100

| RetTime [min] | Type | Area [mAU*s] | Amt/Area   | Amount [ppm] | Grp | Name           |
|---------------|------|--------------|------------|--------------|-----|----------------|
| 8.900         | -    | -            | -          | -            | -   | Levulinic acid |
| 9.861         | BB   | 23.90809     | 0.00000    | 0.00000      | -   | HMF            |
| 10.438        | BB   | 11.50393     | 3.84621e-2 | 4.42465e-1   | -   | DFF            |
| 11.097        | -    | -            | -          | -            | -   | FDCA           |
| 11.400        | -    | -            | -          | -            | -   | Furfural       |

Fig. S26 Reaction conditions: Cellulose (162 mg), C-TsOH (1 mg), [EMIM]Cl (1 g, 7 mmol), 120 °C, 2 h

```

=====
Acq. Operator   : SYSTEM                      Seq. Line : 52
Acq. Instrument : HPLC-DAD                   Location  : P1-E-09
Injection Date  : 12/26/2021 8:28:08 AM      Inj       : 1
                                           Inj Volume: 10.000 µl
Acq. Method    : D:\DATA\2021\Thang 12\25-12-Hang_Trinh_Ha\2021-12-25-HMF 2021-12-25 17-04-
                    50\HMF_cot 150_hat nho.M
Last changed   : 11/30/2021 8:55:26 PM by SYSTEM
Analysis Method: D:\METHOD\HMF_cot 150_hat nho_285nmKQ.M
Last changed   : 12/29/2021 10:03:33 PM by SYSTEM
Additional Info : Peak(s) manually integrated
  
```

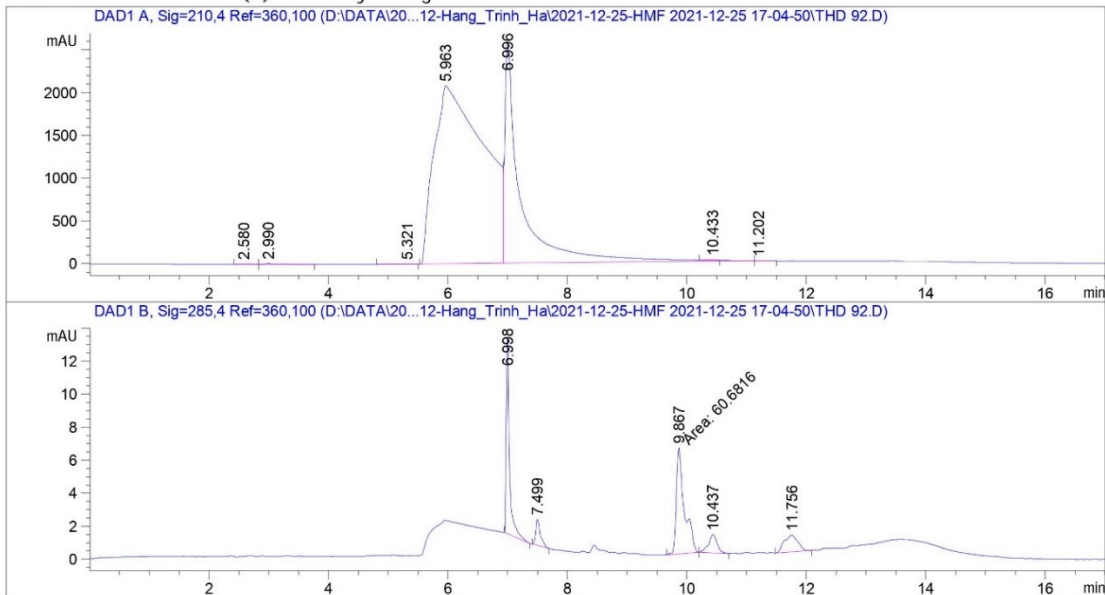

External Standard Report

```

Sorted By       : Signal
Calib. Data Modified : 12/29/2021 10:00:38 AM
Multiplier      : 1.0000
Dilution        : 1.0000
Do not use Multiplier & Dilution Factor with ISTDs
  
```

Signal 1: DAD1 A, Sig=210,4 Ref=360,100

Signal 2: DAD1 B, Sig=285,4 Ref=360,100

| RetTime [min] | Type | Area [mAU*s] | Amt/Area   | Amount [ppm] | Grp | Name           |
|---------------|------|--------------|------------|--------------|-----|----------------|
| 8.900         | -    | -            | -          | -            | -   | Levulinic acid |
| 9.867         | MM   | 60.68159     | 3.08170e-3 | 1.87003e-1   | -   | HMF            |
| 10.437        | BB   | 10.91633     | 3.99725e-2 | 4.36353e-1   | -   | DFF            |
| 11.097        | -    | -            | -          | -            | -   | FDCA           |

Fig. S27 Reaction conditions: Cellulose (162 mg), C-TsOH (1 mg), [EMIM]Cl (1 g, 7 mmol), 120 °C, 4 h

```

=====
Acq. Operator   : SYSTEM                      Seq. Line : 57
Acq. Instrument : HPLC-DAD                   Location  : P1-F-05
Injection Date  : 12/26/2021 9:58:53 AM      Inj       : 1
                                           Inj Volume: 10.000 µl
Acq. Method    : D:\DATA\2021\Thang 12\25-12-Hang_Trinh_Ha\2021-12-25-HMF 2021-12-25 17-04-
                    50\HMF_cot 150_hat nho.M
Last changed   : 11/30/2021 8:55:26 PM by SYSTEM
Analysis Method : D:\METHOD\HMF_cot 150_hat nho_285nmKQ.M
Last changed   : 12/29/2021 10:03:33 PM by SYSTEM
Additional Info : Peak(s) manually integrated
  
```

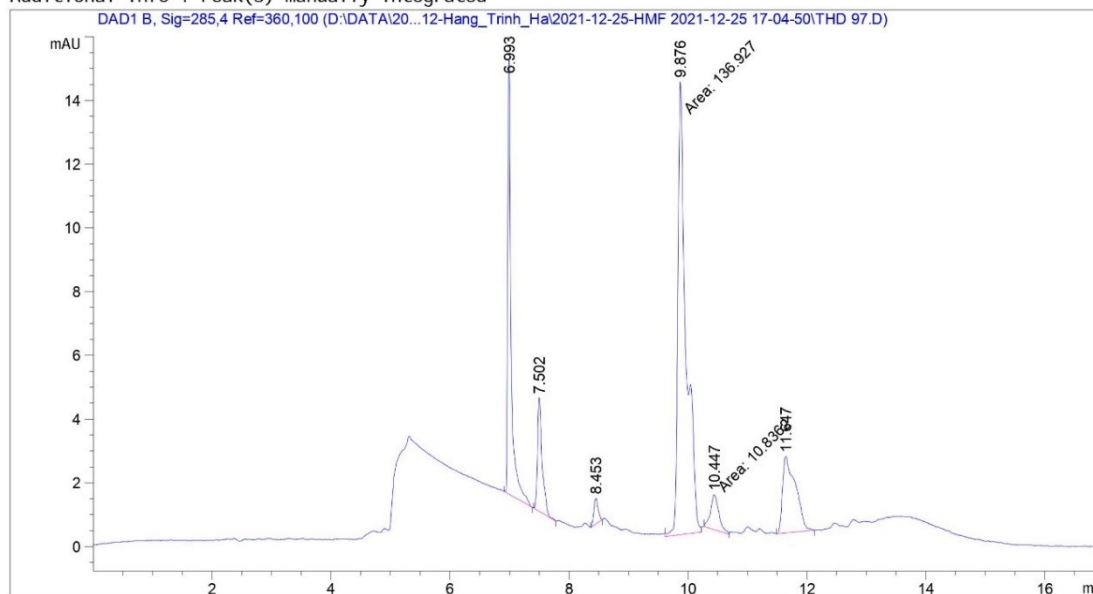

External Standard Report

```

=====
Sorted By      : Signal
Calib. Data Modified : 12/29/2021 10:00:38 PM
Multiplier     : 1.0000
Dilution       : 1.0000
Do not use Multiplier & Dilution Factor with ISTDs
  
```

Signal 1: DAD1 B, Sig=285,4 Ref=360,100

| RetTime [min] | Type | Area [mAU*s] | Amt/Area   | Amount [ppm] | Grp | Name           |
|---------------|------|--------------|------------|--------------|-----|----------------|
| 8.900         | -    | -            | -          | -            | -   | Levulinic acid |
| 9.876         | MM   | 136.92741    | 6.73882e-3 | 9.22730e-1   | -   | HMF            |
| 10.447        | MM   | 10.83617     | 4.01912e-2 | 4.35519e-1   | -   | DFC            |
| 11.097        | -    | -            | -          | -            | -   | FDCA           |
| 11.647        | BB   | 36.39560     | 3.34988e-3 | 1.21921e-1   | -   | Furfural       |

Totals : 1.48017

Fig. S28 Reaction conditions: Cellulose (162 mg), C-TsOH (1 mg), [EMIM]Cl (1 g, 7 mmol), 120 °C, 8 h



```

=====
Acq. Operator   : SYSTEM                      Seq. Line :   62
Acq. Instrument : HPLC-DAD                   Location  : P1-A-08
Injection Date  : 12/26/2021 11:29:11 AM     Inj       :    1
                                           Inj Volume: 10.000 µl
Acq. Method     : D:\DATA\2021\Thang 12\25-12-Hang_Trinh_Ha\2021-12-25-HMF 2021-12-25 17-04-
                    50\HMF_cot 150_hat nho.M
Last changed    : 11/30/2021 8:55:26 PM by SYSTEM
Analysis Method : D:\METHOD\HMF_cot 150_hat nho_285nmKQ.M
Last changed    : 12/29/2021 10:03:33 PM by SYSTEM
Additional Info  : Peak(s) manually integrated
  
```

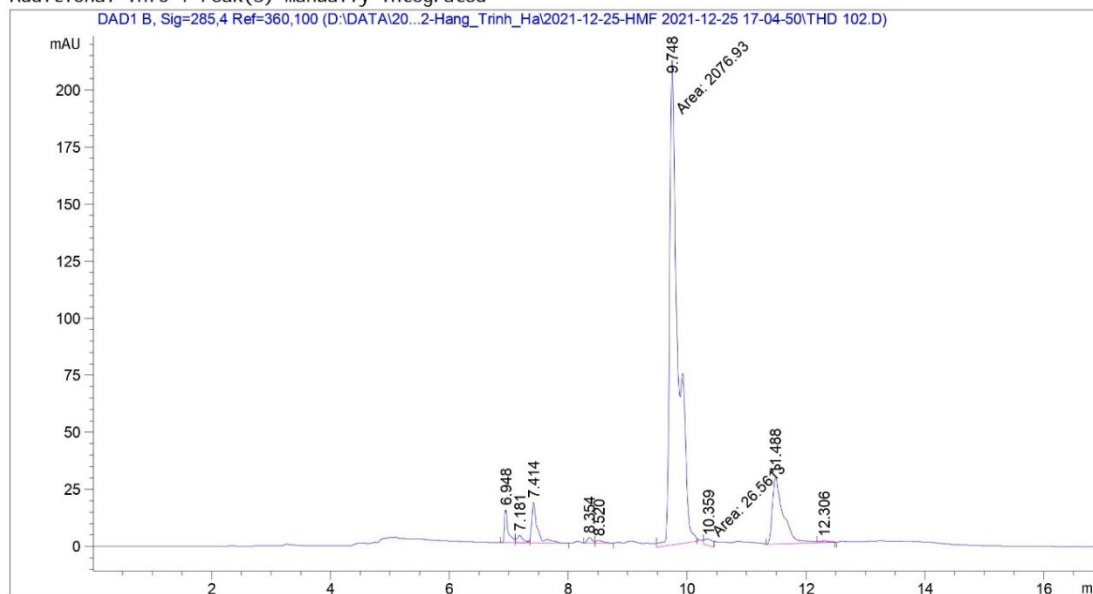

External Standard Report

```

Sorted By      : Signal
Calib. Data Modified : 12/29/2021 10:00:38 PM
Multiplier     : 1.0000
Dilution       : 1.0000
Do not use Multiplier & Dilution Factor with ISTDs
  
```

Signal 1: DAD1 B, Sig=285,4 Ref=360,100

| RetTime [min] | Type | Area [mAU*s] | Amt/Area   | Amount [ppm] | Grp | Name           |
|---------------|------|--------------|------------|--------------|-----|----------------|
| 8.900         |      | -            | -          | -            |     | Levulinic acid |
| 9.748         | MM   | 2076.93140   | 9.45752e-3 | 19.64262     |     | HMF            |
| 10.359        | MM   | 26.56129     | 2.25550e-2 | 5.99090e-1   |     | DFC            |
| 11.097        |      | -            | -          | -            |     | FDCA           |
| 11.488        | BV R | 376.81680    | 9.55237e-3 | 3.59949      |     | Furfural       |

Totals : 23.84120

Fig. S29 Reaction conditions: Cellulose (162 mg), C-TsOH (1 mg), [EMIM]Cl (1 g, 7 mmol), 120 °C, 12 h

```

=====
Acq. Operator   : SYSTEM                      Seq. Line : 19
Acq. Instrument : HPLC-DAD                    Location  : P1-B-06
Injection Date  : 12/26/2021 7:48:47 PM      Inj       : 1
                                           Inj Volume: 10.000 µl
Acq. Method    : D:\DATA\2021\Thang 12\26-12-Hang_Trinh_Ha\2021-12-26-HMF 2021-12-26 14-23-18\HMF_cot 150_hat nho.M
Last changed   : 11/30/2021 8:55:26 PM by SYSTEM
Analysis Method : D:\METHOD\HMF_cot 150_hat nho_KQ.M
Last changed   : 12/30/2021 4:11:12 AM by SYSTEM
                (modified after loading)
Additional Info : Peak(s) manually integrated
  
```

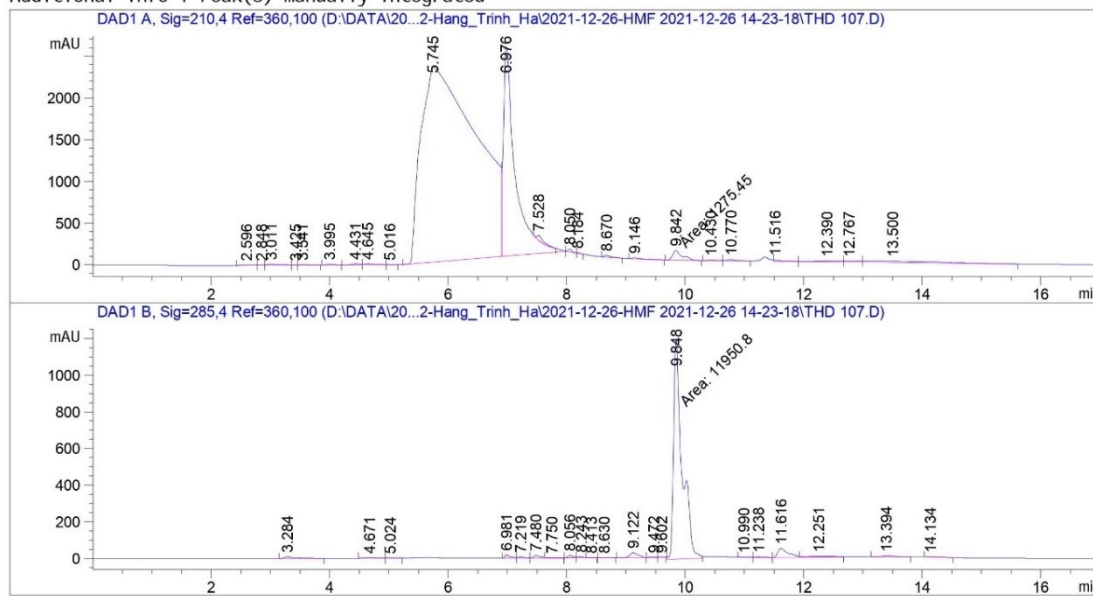

External Standard Report

```

Sorted By      : Signal
Calib. Data Modified : 12/30/2021 4:10:46 AM
Multiplier    : 1.0000
Dilution      : 1.0000
Do not use Multiplier & Dilution Factor with ISTDs
  
```

Signal 1: DAD1 A, Sig=210,4 Ref=360,100

| RetTime [min] | Type | Area [mAU*s] | Amt/Area   | Amount [ppm] | Grp | Name           |
|---------------|------|--------------|------------|--------------|-----|----------------|
| 3.995         | BB   | 85.10044     | 1.33964    | 114.00375    |     | Formic acid    |
| 9.146         | BB   | 94.69553     | 3.49247    | 330.72093    |     | Levulinic acid |
| 9.842         | MM   | 1275.44580   | 1.22672e-1 | 156.46186    |     | HMF            |
| 10.430        | BV   | 48.10609     | 1.15529e-2 | 5.55765e-1   |     | DFF            |
| 11.400        |      | -            | -          | -            |     | FDCA           |
| 11.516        | VB   | 132.96542    | 1.01144e-1 | 13.44864     |     | Furfural       |

Fig. S30 Reaction conditions: Cellulose (162 mg), C-TsOH (1 mg), [EMIM]Cl (1 g, 7 mmol), 120 °C, 18 h

```

=====
Acq. Operator   : SYSTEM                               Seq. Line : 15
Acq. Instrument : HPLC-DAD                             Location  : P1-B-02
Injection Date  : 1/2/2022 2:49:58 PM                 Inj       : 1
                                                    Inj Volume: 10.000 µl
Acq. Method    : D:\DATA\2022\Thang 1\02-01-Hang_Trinh_Ha\2021-12-31-HMF 2022-01-02 10-35-56
                  \HMF_cot 150_hat nho.M
Last changed   : 11/30/2021 8:55:26 PM by SYSTEM
Analysis Method: D:\METHOD\HMF_cot 150_hat nho_KQ.M
Last changed   : 1/15/2022 9:22:34 AM by SYSTEM
                  (modified after loading)
Additional Info : Peak(s) manually integrated
  
```

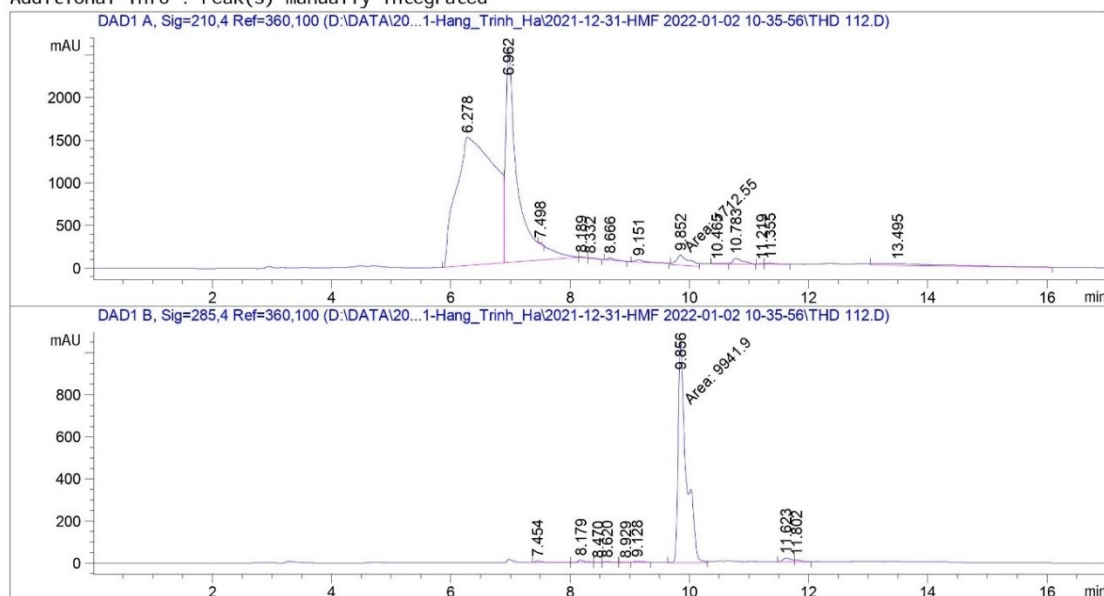

External Standard Report

```

=====
Sorted By      : Signal
Calib. Data Modified : 1/15/2022 9:37:22 AM
Multiplier    : 1.0000
Dilution      : 1.0000
Do not use Multiplier & Dilution Factor with ISTDs
  
```

Signal 1: DAD1 A, Sig=210,4 Ref=360,100

| RetTime [min] | Type | Area [mAU*s] | Amt/Area   | Amount [ppm] | Grp | Name           |
|---------------|------|--------------|------------|--------------|-----|----------------|
| 3.600         | -    | -            | -          | -            | -   | Formic acid    |
| 8.900         | -    | -            | -          | -            | -   | Levulinic acid |
| 9.852         | MM   | 1712.55139   | 1.22953e-1 | 210.56308    | -   | HMF            |
| 10.465        | BV E | 23.97352     | 0.00000    | 0.00000      | -   | DFF            |
| 11.219        | BV   | 26.89837     | 8.02028e-2 | 2.15733      | -   | Furfural       |
| 11.355        | VB   | 143.57739    | 1.79205e-1 | 25.72983     | -   | FDCA           |

Fig. S31 Reaction conditions: Cellulose (162 mg), C-TsOH (1 mg), [EMIM]Cl (1 g, 7 mmol), 120 °C, 24 h



```

=====
Acq. Operator   : SYSTEM                      Seq. Line : 48
Acq. Instrument : HPLC-DAD                   Location  : P1-E-05
Injection Date  : 12/26/2021 7:15:51 AM      Inj       : 1
                                           Inj Volume: 10.000 µl
Acq. Method    : D:\DATA\2021\Thang 12\25-12-Hang_Trinh_Ha\2021-12-25-HMF 2021-12-25 17-04-
                    50\HMF_cot 150_hat nho.M
Last changed   : 11/30/2021 8:55:26 PM by SYSTEM
Analysis Method : D:\METHOD\HMF_cot 150_hat nho_285nmKQ.M
Last changed   : 12/30/2021 3:25:52 AM by SYSTEM
                    (modified after loading)
Additional Info : Peak(s) manually integrated
  
```

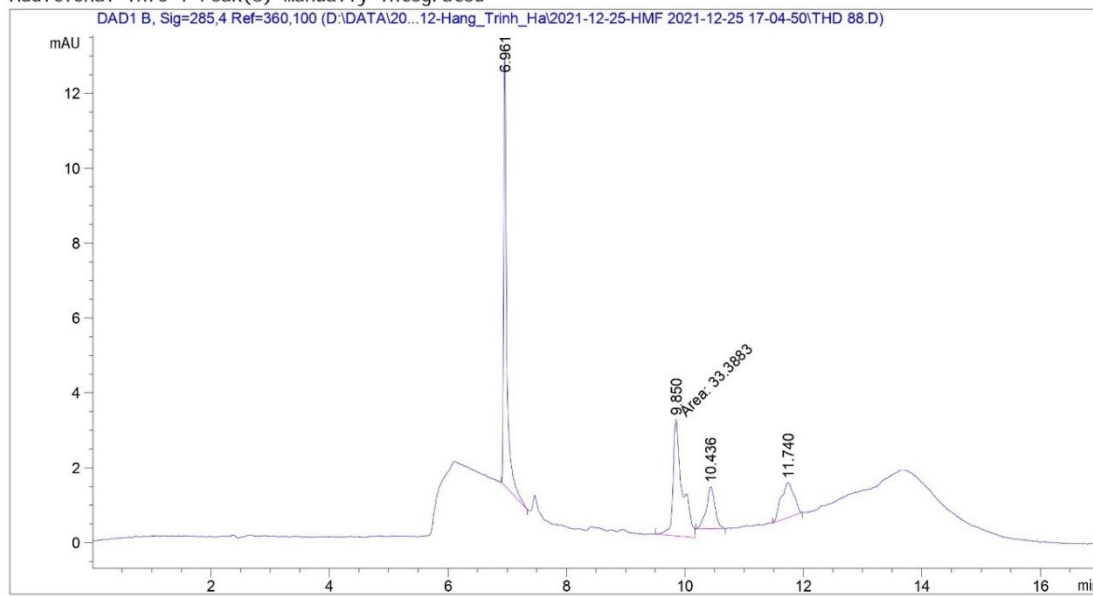

External Standard Report

```

Sorted By      : Signal
Calib. Data Modified : 12/30/2021 3:26:25 AM
Multiplier     : 1.0000
Dilution      : 1.0000
Do not use Multiplier & Dilution Factor with ISTDs
  
```

Signal 1: DAD1 B, Sig=285,4 Ref=360,100

| RetTime [min] | Type | Area [mAU*s] | Amt/Area   | Amount [ppm] | Grp | Name           |
|---------------|------|--------------|------------|--------------|-----|----------------|
| 8.900         | -    | -            | -          | -            | -   | Levulinic acid |
| 9.850         | MM   | 33.38832     | 0.00000    | 0.00000      | -   | HMF            |
| 10.436        | BB   | 11.39798     | 3.87229e-2 | 4.41363e-1   | -   | DFF            |
| 11.097        | -    | -            | -          | -            | -   | FDCA           |
| 11.400        | -    | -            | -          | -            | -   | Furfural       |

Fig. S32 Reaction conditions: Cellulose (162 mg), C-TsOH (5 mg), [EMIM]Cl (1 g, 7 mmol), 120 °C, 2 h

```

=====
Acq. Operator   : SYSTEM                      Seq. Line : 53
Acq. Instrument : HPLC-DAD                    Location  : P1-F-01
Injection Date  : 12/26/2021 8:46:15 AM      Inj       : 1
                                           Inj Volume: 10.000 µl
Acq. Method    : D:\DATA\2021\Thang 12\25-12-Hang_Trinh_Ha\2021-12-25-HMF 2021-12-25 17-04-50\HMF_cot 150_hat nho.M
Last changed   : 11/30/2021 8:55:26 PM by SYSTEM
Analysis Method: D:\METHOD\HMF_cot 150_hat nho_285nmKQ.M
Last changed   : 12/29/2021 10:03:33 PM by SYSTEM
Additional Info: Peak(s) manually integrated
  
```

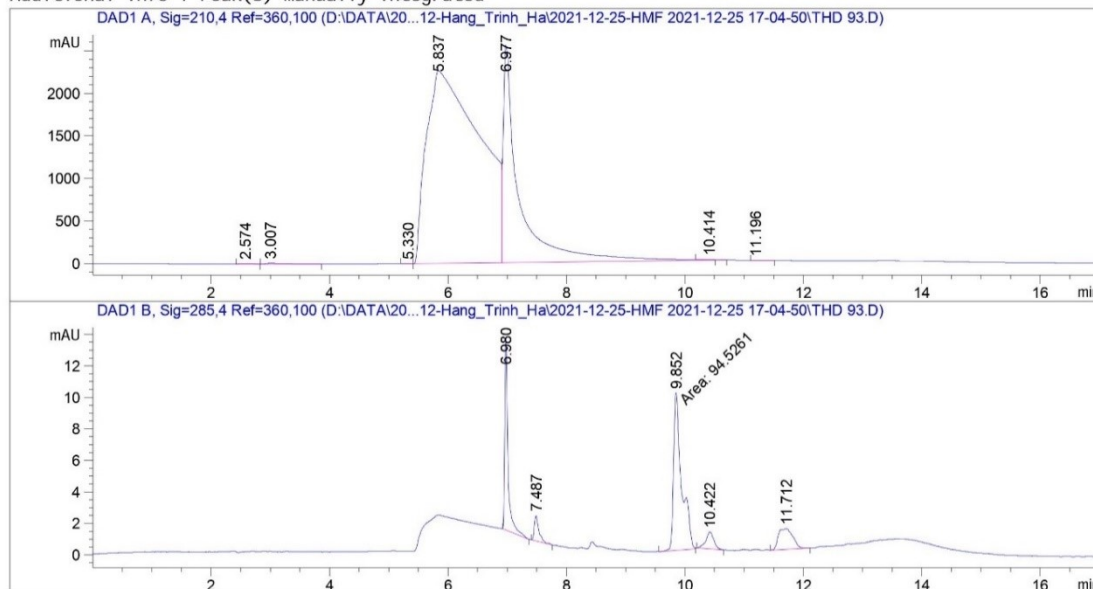

External Standard Report

```

Sorted By      : Signal
Calib. Data Modified : 12/29/2021 10:00:38 PM
Multiplier     : 1.0000
Dilution       : 1.0000
Do not use Multiplier & Dilution Factor with ISTDs
  
```

Signal 1: DAD1 A, Sig=210,4 Ref=360,100

Signal 2: DAD1 B, Sig=285,4 Ref=360,100

| RetTime [min] | Type | Area [mAU*s] | Amt/Area   | Amount [ppm] | Grp | Name           |
|---------------|------|--------------|------------|--------------|-----|----------------|
| 8.900         | -    | -            | -          | -            | -   | Levulinic acid |
| 9.852         | MM   | 94.52610     | 5.43323e-3 | 5.13582e-1   | -   | HMF            |
| 10.422        | BB   | 10.36549     | 4.15439e-2 | 4.30623e-1   | -   | DFF            |
| 11.097        | -    | -            | -          | -            | -   | FDCA           |

Fig. S33 Reaction conditions: Cellulose (162 mg), C-TsOH (5 mg), [EMIM]Cl (1 g, 7 mmol), 120 °C, 4 h

```

=====
Acq. Operator   : SYSTEM                      Seq. Line : 58
Acq. Instrument : HPLC-DAD                   Location  : P1-F-06
Injection Date  : 12/26/2021 10:16:57 AM    Inj       : 1
                                           Inj Volume: 10.000 µl
Acq. Method    : D:\DATA\2021\Thang 12\25-12-Hang_Trinh_Ha\2021-12-25-HMF 2021-12-25 17-04-50\HMF_cot 150_hat nho.M
Last changed   : 11/30/2021 8:55:26 PM by SYSTEM
Analysis Method : D:\METHOD\HMF_cot 150_hat nho_KQ.M
Last changed   : 12/29/2021 10:49:23 PM by SYSTEM
Additional Info : Peak(s) manually integrated
  
```

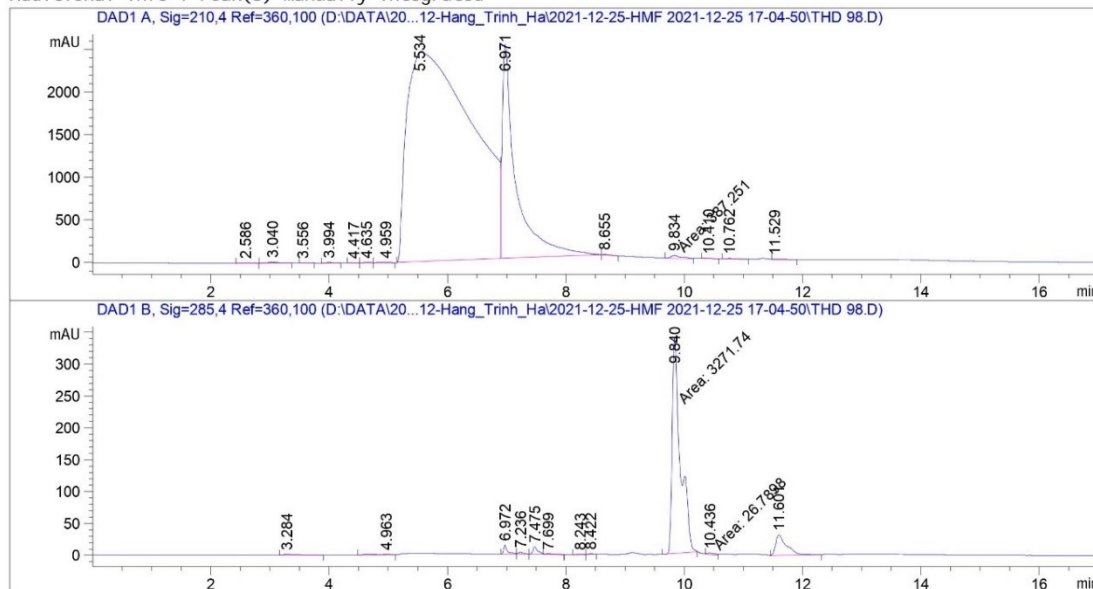

External Standard Report

```

Sorted By      : Signal
Calib. Data Modified : 12/29/2021 10:46:14 PM
Multiplier     : 1.0000
Dilution       : 1.0000
Do not use Multiplier & Dilution Factor with ISTDs
  
```

Signal 1: DAD1 A, Sig=210,4 Ref=360,100

| RetTime [min] | Type | Area [mAU*s] | Amt/Area   | Amount [ppm] | Grp | Name           |
|---------------|------|--------------|------------|--------------|-----|----------------|
| 3.994         | BB   | 52.82903     | 1.37903    | 72.85281     |     | Formic acid    |
| 8.900         |      | -            | -          | -            |     | Levulinic acid |
| 9.834         | MM   | 387.25150    | 1.20151e-1 | 46.52869     |     | HMF            |
| 10.410        | BB   | 34.90281     | 0.00000    | 0.00000      |     | DFF            |
| 11.400        |      | -            | -          | -            |     | FDCA           |
| 11.529        | VB   | 57.82139     | 9.42423e-2 | 5.44922      |     | Furfural       |

Fig. S34 Reaction conditions: Cellulose (162 mg), C-TsOH (5 mg), [EMIM]Cl (1 g, 7 mmol), 120 °C, 8 h

```

=====
Acq. Operator   : SYSTEM                      Seq. Line : 20
Acq. Instrument : HPLC-DAD                   Location  : P1-B-07
Injection Date  : 12/26/2021 8:06:51 PM      Inj       : 1
                                           Inj Volume: 10.000 µl
Acq. Method     : D:\DATA\2021\Thang 12\26-12-Hang_Trinh_Ha\2021-12-26-HMF 2021-12-26 14-23-18\HMF_cot_150_hat_nho.M
Last changed    : 11/30/2021 8:55:26 PM by SYSTEM
Analysis Method : D:\METHOD\HMF_cot_150_hat_nho_KQ.M
Last changed    : 12/30/2021 4:03:08 AM by SYSTEM
                 (modified after loading)
Additional Info : Peak(s) manually integrated
  
```

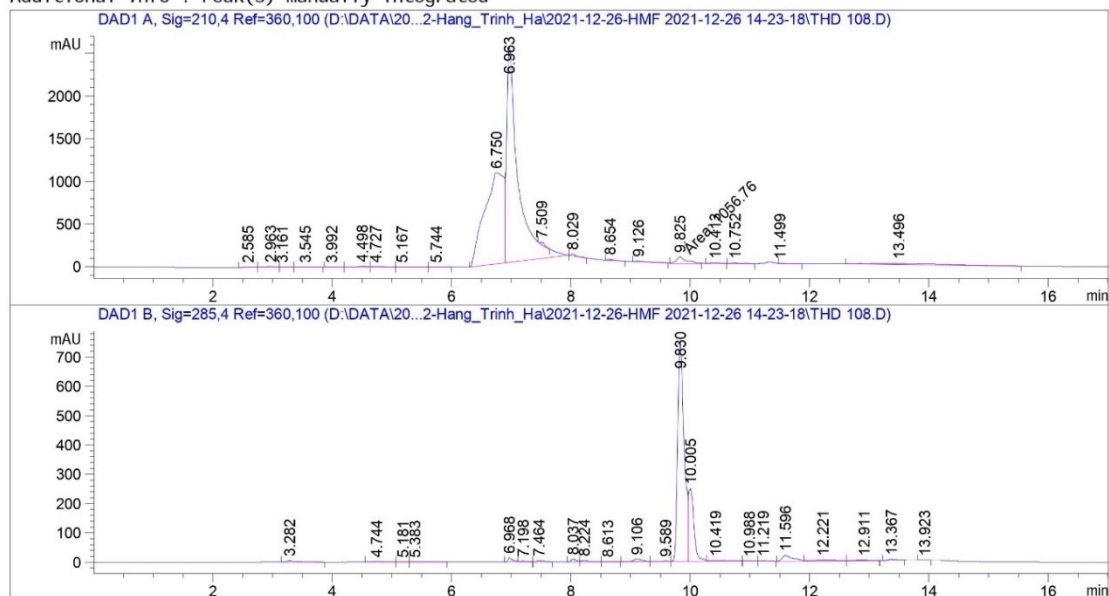

External Standard Report

```

Sorted By      : Signal
Calib. Data Modified : 12/30/2021 4:03:42 AM
Multiplier     : 1.0000
Dilution       : 1.0000
Do not use Multiplier & Dilution Factor with ISTDs
  
```

Signal 1: DAD1 A, Sig=210,4 Ref=360,100

| RetTime [min] | Type | Area [mAU*s] | Amt/Area   | Amount [ppm] | Grp | Name           |
|---------------|------|--------------|------------|--------------|-----|----------------|
| 3.992         | BB   | 31.68664     | 1.44834    | 45.89308     |     | Formic acid    |
| 9.126         | BB   | 62.94244     | 3.52231    | 221.70289    |     | Levulinic acid |
| 9.825         | MM   | 1056.76453   | 1.22445e-1 | 129.39534    |     | HMF            |
| 10.413        | VB   | 45.88551     | 9.12493e-3 | 4.18702e-1   |     | DFF            |
| 11.400        |      | -            | -          | -            |     | FDCA           |
| 11.499        | VB   | 58.59129     | 9.44027e-2 | 5.53118      |     | Furfural       |

Fig. S35 Reaction conditions: Cellulose (162 mg), C-TsOH (5 mg), [EMIM]Cl (1 g, 7 mmol), 120 °C, 18 h

```

=====
Acq. Operator   : SYSTEM                               Seq. Line : 16
Acq. Instrument : HPLC-DAD                             Location  : P1-B-03
Injection Date  : 1/2/2022 3:08:03 PM                  Inj       : 1
                                                    Inj Volume: 10.000 µl
Acq. Method    : D:\DATA\2022\Thang 1\02-01-Hang_Trinh_Ha\2021-12-31-HMF 2022-01-02 10-35-56
                \HMF_cot 150_hat_nho.M
Last changed   : 11/30/2021 8:55:26 PM by SYSTEM
Analysis Method: D:\METHOD\HMF_cot 150_hat_nho_KQ.M
Last changed   : 1/15/2022 9:22:34 AM by SYSTEM
                (modified after loading)
Additional Info : Peak(s) manually integrated
  
```

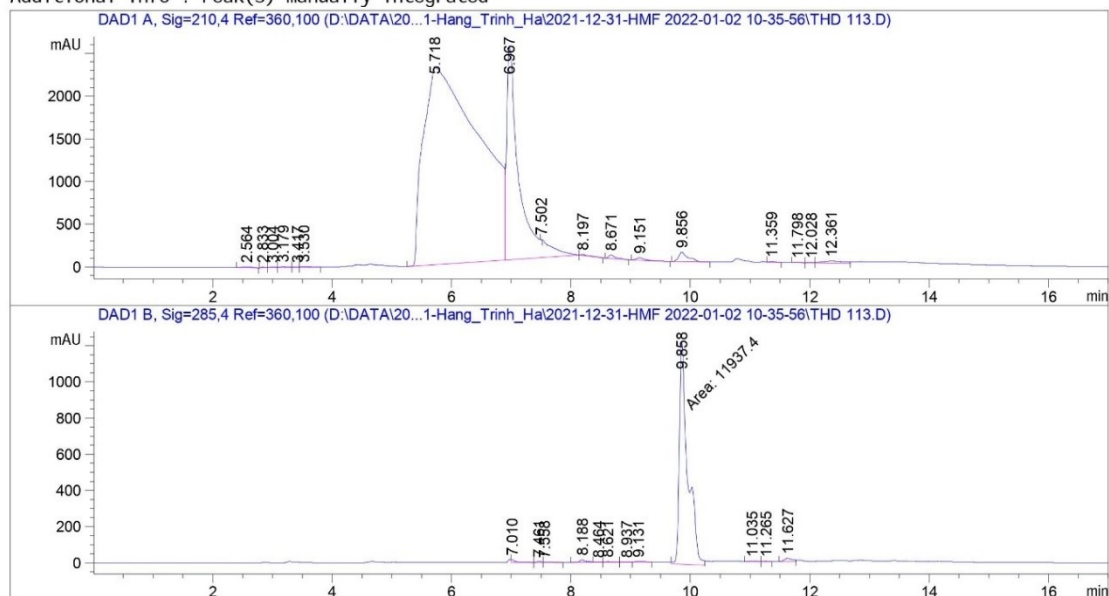

External Standard Report

```

=====
Sorted By      : Signal
Calib. Data Modified : 1/15/2022 9:37:22 AM
Multiplier    : 1.0000
Dilution      : 1.0000
Do not use Multiplier & Dilution Factor with ISTDs
  
```

Signal 1: DAD1 A, Sig=210,4 Ref=360,100

| RetTime [min] | Type | Area [mAU*s] | Amt/Area   | Amount [ppm] | Grp | Name           |
|---------------|------|--------------|------------|--------------|-----|----------------|
| 3.530         | VB   | 116.43640    | 1.32228    | 153.96183    |     | Formic acid    |
| 8.900         |      | -            | -          | -            |     | Levulinic acid |
| 9.856         | BB   | 1245.18176   | 1.22646e-1 | 152.71603    |     | HMF            |
| 10.600        |      | -            | -          | -            |     | DFF            |
| 11.359        | VB   | 82.51188     | 9.78966e-2 | 8.07763      |     | Furfural       |
| 11.798        | BB   | 4.94747      | 0.00000    | 0.00000      |     | FDCA           |

Fig. S36 Reaction conditions: Cellulose (162 mg), C-TsOH (5 mg), [EMIM]Cl (1 g, 7 mmol), 120 °C, 24 h



```

=====
Acq. Operator   : SYSTEM                      Seq. Line : 49
Acq. Instrument : HPLC-DAD                   Location  : P1-E-06
Injection Date  : 12/26/2021 7:33:57 AM      Inj       : 1
                                           Inj Volume: 10.000 µl
Acq. Method    : D:\DATA\2021\Thang 12\25-12-Hang_Trinh_Ha\2021-12-25-HMF 2021-12-25 17-04-50\HMF_cot 150_hat nho.M
Last changed   : 11/30/2021 8:55:26 PM by SYSTEM
Analysis Method : D:\METHOD\HMF_cot 150_hat nho_285nmKQ.M
Last changed   : 12/29/2021 10:03:33 PM by SYSTEM
Additional Info : Peak(s) manually integrated
  
```

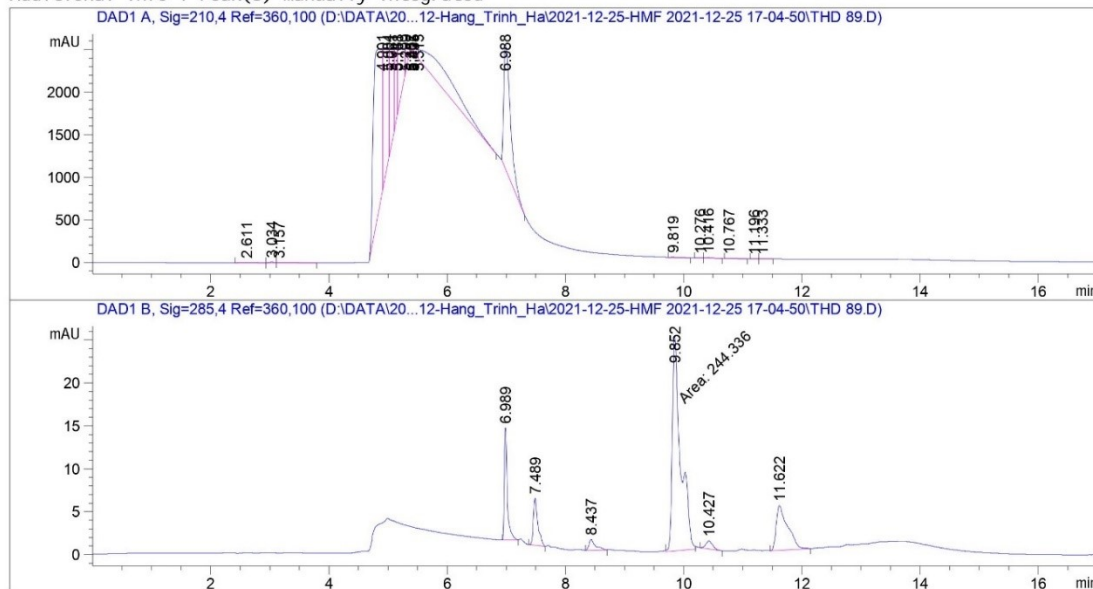

External Standard Report

```

Sorted By      : Signal
Calib. Data Modified : 12/29/2021 10:00:38 PM
Multiplier     : 1.0000
Dilution       : 1.0000
Do not use Multiplier & Dilution Factor with ISTDs
  
```

Signal 1: DAD1 A, Sig=210,4 Ref=360,100

Signal 2: DAD1 B, Sig=285,4 Ref=360,100

| RetTime [min] | Type | Area [mAU*s] | Amt/Area   | Amount [ppm] | Grp | Name           |
|---------------|------|--------------|------------|--------------|-----|----------------|
| 8.900         | -    | -            | -          | -            | -   | Levulinic acid |
| 9.852         | MM   | 244.33629    | 8.01830e-3 | 1.95916      | -   | HMF            |
| 10.427        | BB   | 7.44019      | 5.37882e-2 | 4.00194e-1   | -   | DFF            |
| 11.097        | -    | -            | -          | -            | -   | FDCA           |

Fig. S37 Reaction conditions: Cellulose (162 mg), C-TsOH (8 mg), [EMIM]Cl (1 g, 7 mmol), 120 °C, 2 h

```

=====
Acq. Operator   : SYSTEM                               Seq. Line : 54
Acq. Instrument : HPLC-DAD                             Location  : P1-F-02
Injection Date  : 12/26/2021 9:04:34 AM                Inj       : 1
                                                    Inj Volume: 10.000 µl
Acq. Method    : D:\DATA\2021\Thang 12\25-12-Hang_Trinh_Ha\2021-12-25-HMF 2021-12-25 17-04-50\HMF_cot 150_hat_nho.M
Last changed   : 11/30/2021 8:55:26 PM by SYSTEM
Analysis Method: D:\METHOD\HMF_cot 150_hat_nho_285nmKQ.M
Last changed   : 12/29/2021 10:03:33 PM by SYSTEM
Additional Info: Peak(s) manually integrated
  
```

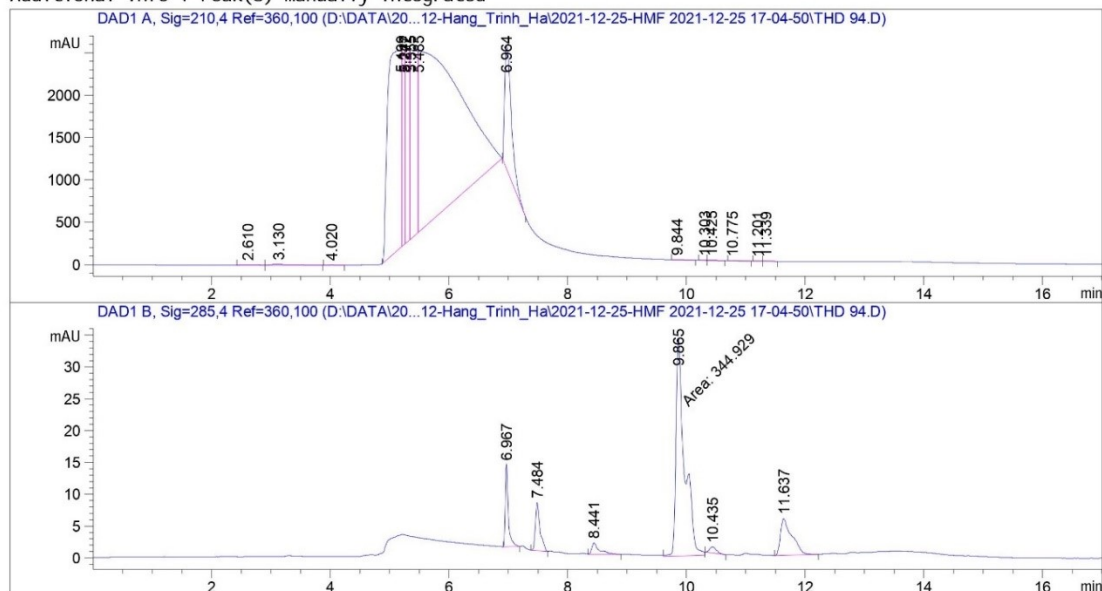

External Standard Report

```

Sorted By      : Signal
Calib. Data Modified : 12/29/2021 10:00:38 PM
Multiplier     : 1.0000
Dilution       : 1.0000
Do not use Multiplier & Dilution Factor with ISTDs
  
```

Signal 1: DAD1 A, Sig=210,4 Ref=360,100

Signal 2: DAD1 B, Sig=285,4 Ref=360,100

| RetTime [min] | Type | Area [mAU*s] | Amt/Area   | Amount [ppm] | Grp | Name           |
|---------------|------|--------------|------------|--------------|-----|----------------|
| 8.900         | -    | -            | -          | -            | -   | Levulinic acid |
| 9.865         | MM   | 344.92883    | 8.49399e-3 | 2.92982      | -   | HMF            |
| 10.435        | BB   | 7.28798      | 5.46943e-2 | 3.98611e-1   | -   | DFF            |
| 11.097        | -    | -            | -          | -            | -   | FDCA           |

Fig. S38 Reaction conditions: Cellulose (162 mg), C-TsOH (8 mg), [EMIM]Cl (1 g, 7 mmol), 120 °C, 4 h

```

=====
Acq. Operator   : SYSTEM                               Seq. Line : 59
Acq. Instrument : HPLC-DAD                             Location  : P1-F-07
Injection Date  : 12/26/2021 10:34:59 AM              Inj       : 1
                                                    Inj Volume: 10.000 µl
Acq. Method    : D:\DATA\2021\Thang 12\25-12-Hang_Trinh_Ha\2021-12-25-HMF 2021-12-25 17-04-
                    50\HMF_cot 150_hat nho.M
Last changed   : 11/30/2021 8:55:26 PM by SYSTEM
Analysis Method : D:\METHOD\HMF_cot 150_hat nho_KQ.M
Last changed   : 12/29/2021 10:49:23 PM by SYSTEM
Additional Info : Peak(s) manually integrated
  
```

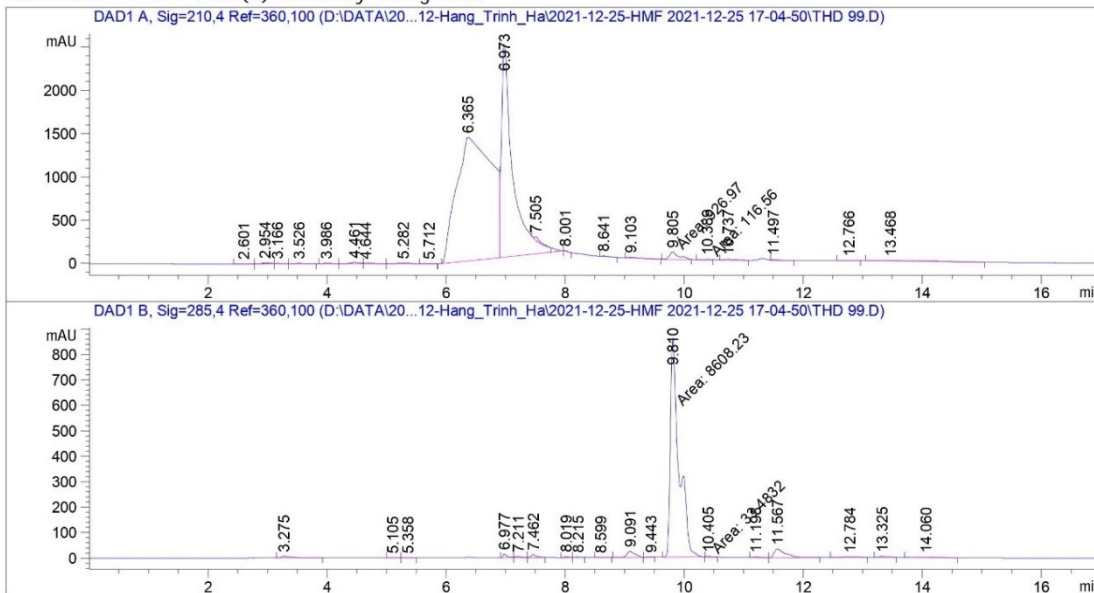

External Standard Report

```

Sorted By      : Signal
Calib. Data Modified : 12/29/2021 10:46:14 PM
Multiplier     : 1.0000
Dilution       : 1.0000
Do not use Multiplier & Dilution Factor with ISTDs
  
```

Signal 1: DAD1 A, Sig=210,4 Ref=360,100

| RetTime [min] | Type | Area [mAU*s] | Amt/Area   | Amount [ppm] | Grp | Name           |
|---------------|------|--------------|------------|--------------|-----|----------------|
| 3.986         | BB   | 65.77831     | 1.35858    | 89.36511     |     | Formic acid    |
| 9.103         | BB   | 85.86153     | 3.49855    | 300.39112    |     | Levulinic acid |
| 9.805         | MM   | 926.97028    | 1.22259e-1 | 113.33051    |     | HMF            |
| 10.389        | MM   | 116.56023    | 4.10179e-2 | 4.78106      |     | DFP            |
| 11.400        |      | -            | -          | -            |     | FDCA           |
| 11.497        | VB   | 77.56612     | 9.73509e-2 | 7.55113      |     | Furfural       |

Fig. S39 Reaction conditions: Cellulose (162 mg), C-TsOH (8 mg), [EMIM]Cl (1 g, 7 mmol), 120 °C, 8 h



```

=====
Acq. Operator   : SYSTEM                      Seq. Line : 21
Acq. Instrument : HPLC-DAD                   Location  : P1-B-08
Injection Date  : 12/26/2021 8:24:57 PM      Inj       : 1
                                           Inj Volume: 10.000 µl
Acq. Method     : D:\DATA\2021\Thang 12\26-12-Hang_Trinh_Ha\2021-12-26-HMF 2021-12-26 14-23-
                  18\HMF_cot 150_hat nho.M
Last changed    : 11/30/2021 8:55:26 PM by SYSTEM
Analysis Method : D:\METHOD\HMF_cot 150_hat nho_KQ.M
Last changed    : 12/30/2021 4:11:12 AM by SYSTEM
                  (modified after loading)
Additional Info  : Peak(s) manually integrated
  
```

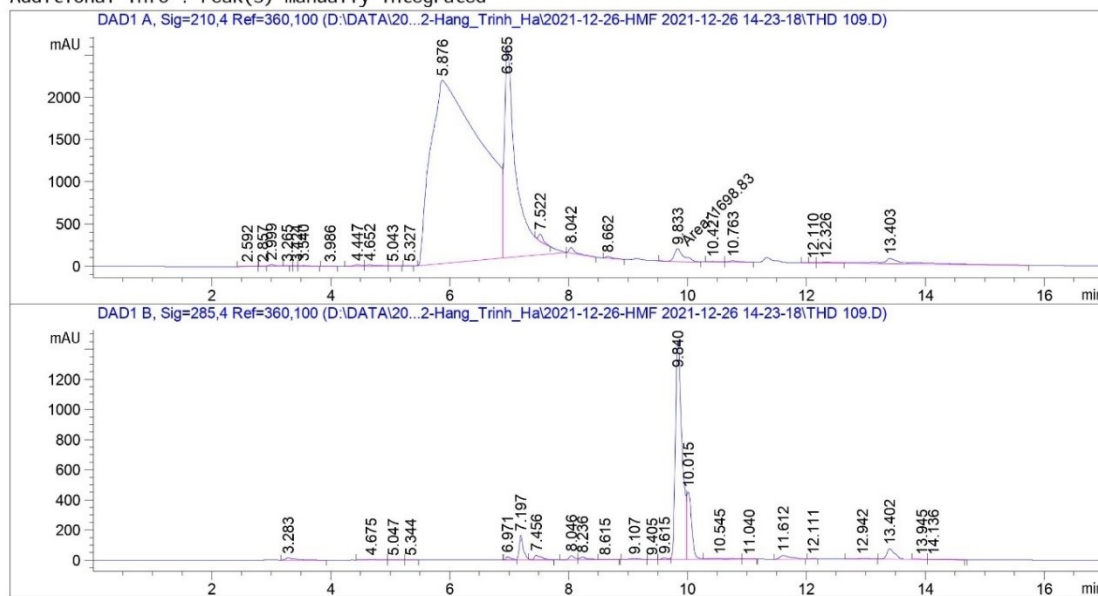

External Standard Report

```

Sorted By      : Signal
Calib. Data Modified : 12/30/2021 4:11:50 AM
Multiplier     : 1.0000
Dilution       : 1.0000
Do not use Multiplier & Dilution Factor with ISTDs
  
```

Signal 1: DAD1 A, Sig=210,4 Ref=360,100

| RetTime [min] | Type | Area [mAU*s] | Amt/Area   | Amount [ppm] | Grp | Name           |
|---------------|------|--------------|------------|--------------|-----|----------------|
| 3.986         | BB   | 11.42219     | 1.75560    | 20.05284     |     | Formic acid    |
| 9.100         |      | -            | -          | -            |     | Levulinic acid |
| 9.833         | MM   | 1698.83325   | 1.22946e-1 | 208.86517    |     | HMF            |
| 10.427        | BV   | 54.88454     | 1.77493e-2 | 9.74162e-1   |     | DFP            |
| 11.400        |      | -            | -          | -            |     | FDCA           |
| 11.500        |      | -            | -          | -            |     | Furfural       |

Fig. S40 Reaction conditions: Cellulose (162 mg), C-TsOH (8 mg), [EMIM]Cl (1 g, 7 mmol), 120 °C, 18 h

```

=====
Acq. Operator   : SYSTEM                      Seq. Line : 17
Acq. Instrument : HPLC-DAD                    Location  : P1-B-04
Injection Date  : 1/2/2022 3:26:12 PM         Inj       : 1
                                           Inj Volume: 10.000 µl
Acq. Method     : D:\DATA\2022\Thang 1\02-01-Hang_Trinh_Ha\2021-12-31-HMF 2022-01-02 10-35-56
                                           \HMF_cot 150_hat nho.M
Last changed    : 11/30/2021 8:55:26 PM by SYSTEM
Analysis Method : D:\METHOD\HMF_cot 150_hat nho_KQ.M
Last changed    : 1/15/2022 9:22:34 AM by SYSTEM
                                           (modified after loading)
Additional Info  : Peak(s) manually integrated
  
```

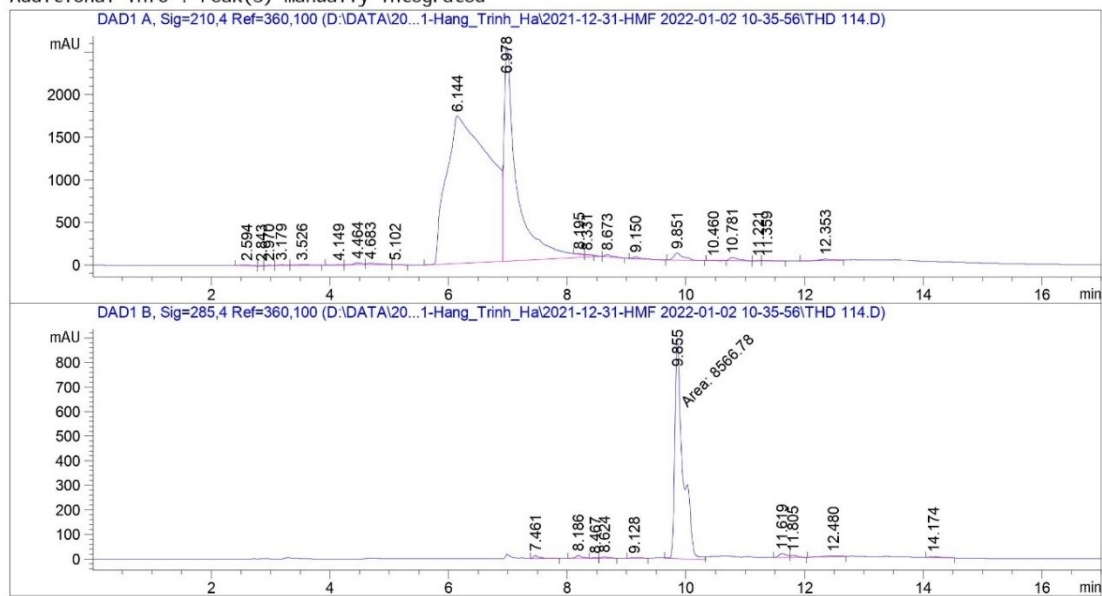

External Standard Report

```

Sorted By      : Signal
Calib. Data Modified : 1/15/2022 9:37:22 AM
Multiplier     : 1.0000
Dilution       : 1.0000
Do not use Multiplier & Dilution Factor with ISTDs
  
```

Signal 1: DAD1 A, Sig=210,4 Ref=360,100

| RetTime [min] | Type | Area [mAU*s] | Amt/Area   | Amount [ppm] | Grp | Name           |
|---------------|------|--------------|------------|--------------|-----|----------------|
| 3.526         | VB   | 172.69521    | 1.30693    | 225.70031    |     | Formic acid    |
| 8.900         |      | -            | -          | -            |     | Levulinic acid |
| 9.851         | BB   | 963.32281    | 1.22316e-1 | 117.82992    |     | HMF            |
| 10.460        | BV E | 37.21394     | 0.00000    | 0.00000      |     | DFF            |
| 11.221        | BV   | 38.93731     | 8.83195e-2 | 3.43892      |     | Furfural       |
| 11.359        | VB   | 88.85829     | 1.65493e-1 | 14.70539     |     | FDCA           |

Fig. S41 Reaction conditions: Cellulose (162 mg), C-TsOH (8 mg), [EMIM]Cl (1 g, 7 mmol), 120 °C, 24 h

```

=====
Acq. Operator   : SYSTEM                      Seq. Line : 50
Acq. Instrument : HPLC-DAD                   Location  : P1-E-07
Injection Date  : 12/26/2021 7:52:01 AM      Inj       : 1
                                           Inj Volume: 10.000 µl
Acq. Method     : D:\DATA\2021\Thang 12\25-12-Hang_Trinh_Ha\2021-12-25-HMF 2021-12-25 17-04-
                    50\HMF_cot 150_hat nho.M
Last changed    : 11/30/2021 8:55:26 PM by SYSTEM
Analysis Method : D:\METHOD\HMF_cot 150_hat nho_285nmKQ.M
Last changed    : 12/29/2021 10:03:33 PM by SYSTEM
Additional Info  : Peak(s) manually integrated
  
```

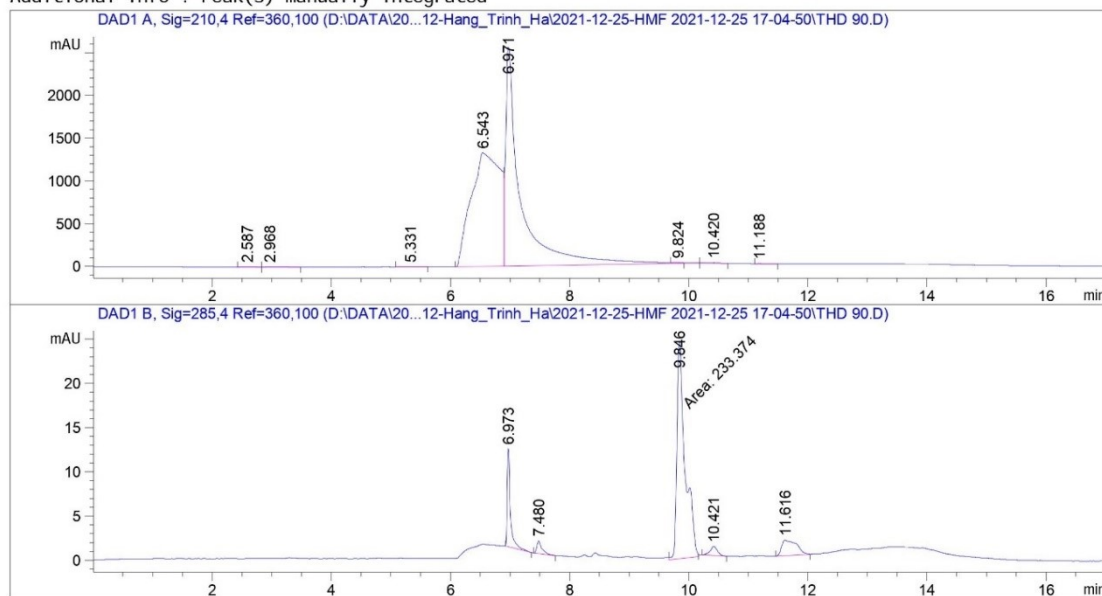

External Standard Report

```

Sorted By      : Signal
Calib. Data Modified : 12/29/2021 10:00:38 PM
Multiplier     : 1.0000
Dilution       : 1.0000
Do not use Multiplier & Dilution Factor with ISTDs
  
```

Signal 1: DAD1 A, Sig=210,4 Ref=360,100

Signal 2: DAD1 B, Sig=285,4 Ref=360,100

| RetTime [min] | Type | Area [mAU*s] | Amt/Area   | Amount [ppm] | Grp | Name           |
|---------------|------|--------------|------------|--------------|-----|----------------|
| 8.900         |      | -            | -          | -            |     | Levulinic acid |
| 9.846         | MM   | 233.37379    | 7.94168e-3 | 1.85338      |     | HMF            |
| 10.421        | BB   | 8.74920      | 4.72970e-2 | 4.13811e-1   |     | DFF            |
| 11.097        |      | -            | -          | -            |     | FDCA           |

Fig. S42 Reaction conditions: Cellulose (162 mg), C-TsOH (10 mg), [EMIM]Cl (1 g, 7 mmol), 120 °C, 2 h

```

=====
Acq. Operator   : SYSTEM                      Seq. Line : 55
Acq. Instrument : HPLC-DAD                   Location  : P1-F-03
Injection Date  : 12/26/2021 9:22:38 AM      Inj       : 1
                                           Inj Volume: 10.000 µl
Acq. Method    : D:\DATA\2021\Thang 12\25-12-Hang_Trinh_Ha\2021-12-25-HMF 2021-12-25 17-04-
                    50\HMF_cot 150_hat_nho.M
Last changed   : 11/30/2021 8:55:26 PM by SYSTEM
Analysis Method: D:\METHOD\HMF_cot 150_hat_nho_285nmKQ.M
Last changed   : 12/29/2021 10:03:33 PM by SYSTEM
Additional Info: Peak(s) manually integrated
  
```

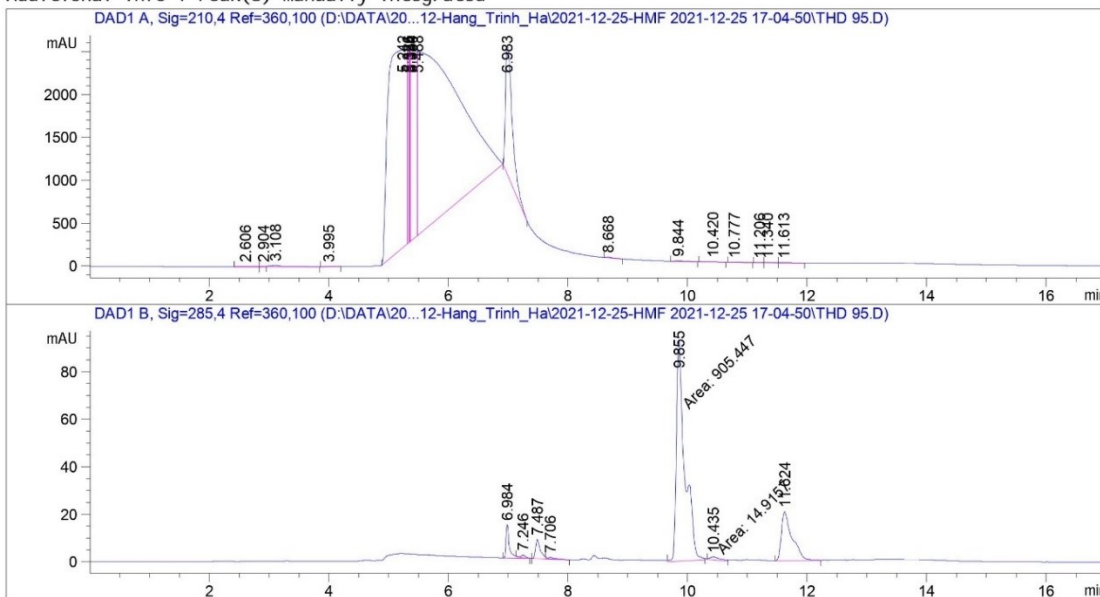

External Standard Report

```

Sorted By      : Signal
Calib. Data Modified : 12/29/2021 10:00:38 PM
Multiplier     : 1.0000
Dilution       : 1.0000
Do not use Multiplier & Dilution Factor with ISTDs
  
```

Signal 1: DAD1 A, Sig=210,4 Ref=360,100

Signal 2: DAD1 B, Sig=285,4 Ref=360,100

| RetTime [min] | Type | Area [mAU*s] | Amt/Area   | Amount [ppm] | Grp | Name           |
|---------------|------|--------------|------------|--------------|-----|----------------|
| 8.900         | -    | -            | -          | -            | -   | Levulinic acid |
| 9.855         | MM   | 905.44720    | 9.20925e-3 | 8.33849      | -   | HMF            |
| 10.435        | MM   | 14.91570     | 3.20437e-2 | 4.77954e-1   | -   | DFF            |
| 11.097        | -    | -            | -          | -            | -   | FDCA           |

Fig. S43 Reaction conditions: Cellulose (162 mg), C-TsOH (10 mg), [EMIM]Cl (1 g, 7 mmol), 120 °C, 4 h

```

=====
Acq. Operator   : SYSTEM                      Seq. Line : 60
Acq. Instrument : HPLC-DAD                   Location  : P1-F-08
Injection Date  : 12/26/2021 10:53:04 AM     Inj       : 1
                                           Inj Volume: 10.000 µl
Acq. Method     : D:\DATA\2021\Thang 12\25-12-Hang_Trinh_Ha\2021-12-25-HMF 2021-12-25 17-04-
                    50\HMF_cot 150_hat nho.M
Last changed    : 11/30/2021 8:55:26 PM by SYSTEM
Analysis Method : D:\METHOD\HMF_cot 150_hat nho_KQ.M
Last changed    : 12/29/2021 10:49:23 PM by SYSTEM
Additional Info  : Peak(s) manually integrated
  
```

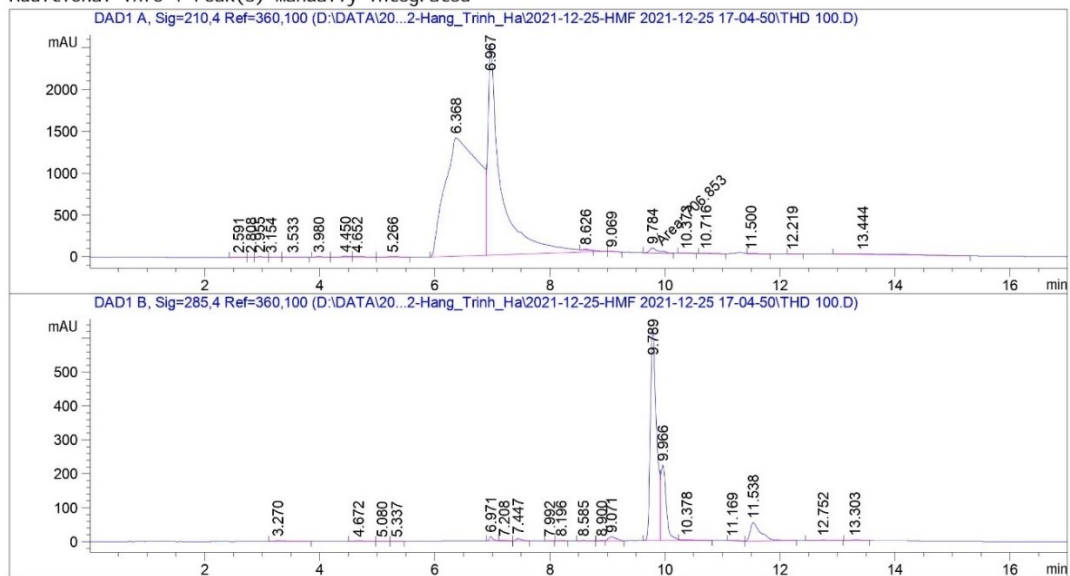

External Standard Report

```

Sorted By      : Signal
Calib. Data Modified : 12/29/2021 10:46:14 PM
Multiplier     : 1.0000
Dilution      : 1.0000
Do not use Multiplier & Dilution Factor with ISTDs
  
```

Signal 1: DAD1 A, Sig=210,4 Ref=360,100

| RetTime [min] | Type | Area [mAU*s] | Amt/Area   | Amount [ppm] | Grp | Name           |
|---------------|------|--------------|------------|--------------|-----|----------------|
| 3.980         | BB   | 58.48380     | 1.36899    | 80.06350     |     | Formic acid    |
| 9.069         | BB   | 26.65977     | 3.64344    | 97.13342     |     | Levulinic acid |
| 9.784         | MM   | 706.85278    | 1.21788e-1 | 86.08623     |     | HMF            |
| 10.373        | BB   | 40.32393     | 1.87026e-3 | 7.54163e-2   |     | DFF            |
| 11.400        |      | -            | -          | -            |     | FDCA           |
| 11.500        | VB   | 87.90183     | 9.84213e-2 | 8.65142      |     | Furfural       |

Fig. S44 Reaction conditions: Cellulose (162 mg), C-TsOH (10 mg), [EMIM]Cl (1 g, 7 mmol), 120 °C, 8 h



```

=====
Acq. Operator   : SYSTEM                               Seq. Line : 22
Acq. Instrument : HPLC-DAD                           Location  : P1-B-09
Injection Date  : 12/26/2021 8:42:57 PM              Inj       : 1
                                                    Inj Volume: 10.000 µl
Acq. Method    : D:\DATA\2021\Thang 12\26-12-Hang_Trinh_Ha\2021-12-26-HMF 2021-12-26 14-23-18\HMF_cot_150_hat_nho.M
Last changed   : 11/30/2021 8:55:26 PM by SYSTEM
Analysis Method: D:\METHOD\HMF_cot_150_hat_nho_KQ.M
Last changed   : 12/30/2021 4:11:12 AM by SYSTEM
                (modified after loading)
Additional Info : Peak(s) manually integrated
  
```

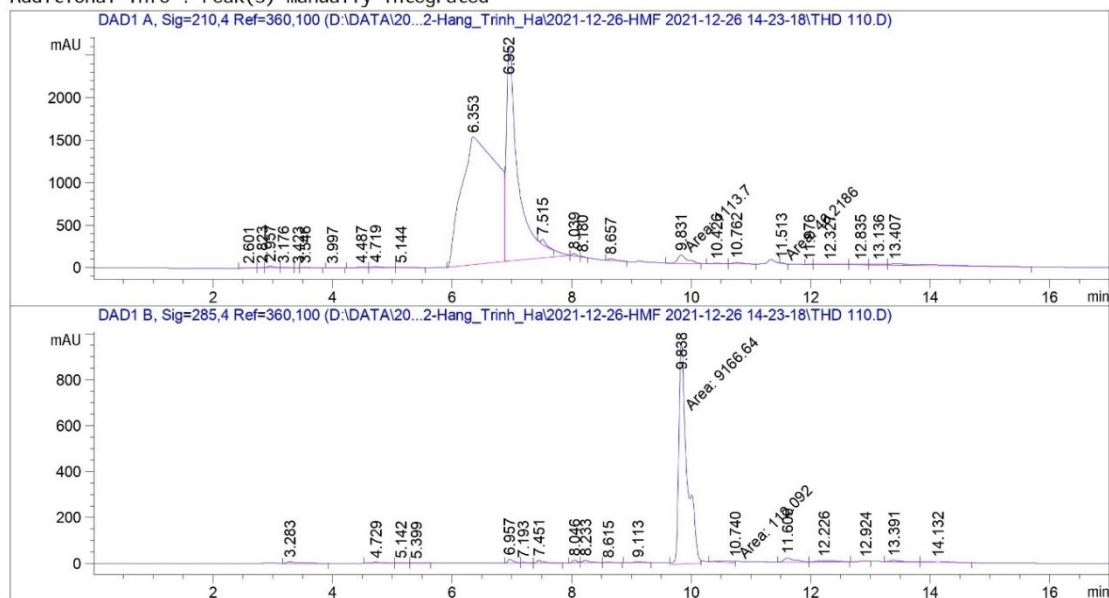

External Standard Report

```

Sorted By      : Signal
Calib. Data Modified : 12/30/2021 4:11:50 AM
Multiplier    : 1.0000
Dilution      : 1.0000
Do not use Multiplier & Dilution Factor with ISTDs
  
```

Signal 1: DAD1 A, Sig=210,4 Ref=360,100

| RetTime [min] | Type | Area [mAU*s] | Amt/Area   | Amount [ppm] | Grp | Name           |
|---------------|------|--------------|------------|--------------|-----|----------------|
| 3.997         | BB   | 9.48393      | 1.85380    | 17.58126     |     | Formic acid    |
| 9.100         |      | -            | -          | -            |     | Levulinic acid |
| 9.831         | MM   | 1113.69763   | 1.22513e-1 | 136.44204    |     | HMF            |
| 10.426        | BV   | 55.05600     | 1.78862e-2 | 9.84745e-1   |     | DFF            |
| 11.400        |      | -            | -          | -            |     | FDCA           |
| 11.513        | MM   | 46.21861     | 9.11765e-2 | 4.21405      |     | Furfural       |

Fig. S45 Reaction conditions: Cellulose (162 mg), C-TsOH (10 mg), [EMIM]Cl (1 g, 7 mmol), 120 °C, 18 h



```

=====
Acq. Operator   : SYSTEM                               Seq. Line : 17
Acq. Instrument : HPLC-DAD                           Location  : P1-B-04
Injection Date  : 12/26/2021 7:12:38 PM              Inj       : 1
                                                    Inj Volume: 10.000 µl
Acq. Method    : D:\DATA\2021\Thang 12\26-12-Hang_Trinh_Ha\2021-12-26-HMF 2021-12-26 14-23-
                18\HMF_cot 150_hat nho.M
Last changed   : 11/30/2021 8:55:26 PM by SYSTEM
Analysis Method: D:\METHOD\HMF_cot 150_hat nho_KQ.M
Last changed   : 12/30/2021 4:03:08 AM by SYSTEM
                (modified after loading)
Additional Info : Peak(s) manually integrated
  
```

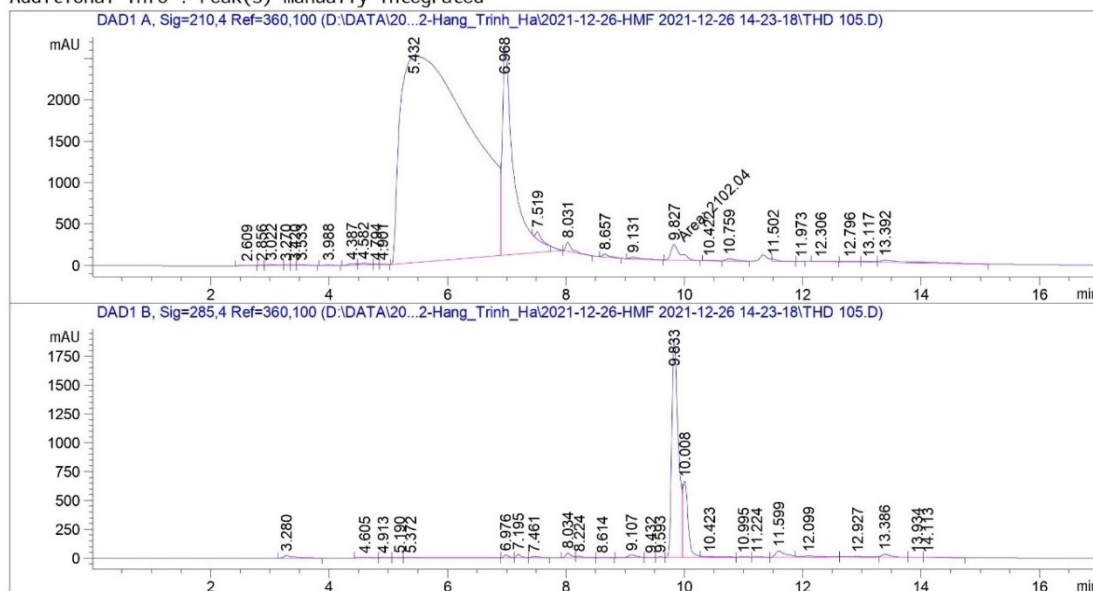

External Standard Report

```

Sorted By      : Signal
Calib. Data Modified : 12/30/2021 4:03:42 AM
Multiplier     : 1.0000
Dilution      : 1.0000
Do not use Multiplier & Dilution Factor with ISTDs
  
```

Signal 1: DAD1 A, Sig=210,4 Ref=360,100

| RetTime [min] | Type | Area [mAU*s] | Amt/Area   | Amount [ppm] | Grp | Name           |
|---------------|------|--------------|------------|--------------|-----|----------------|
| 3.988         | BB   | 61.88739     | 1.36383    | 84.40360     |     | Formic acid    |
| 9.131         | BB   | 240.84747    | 3.45657    | 832.50511    |     | Levulinic acid |
| 9.827         | MM   | 2102.04443   | 1.23105e-1 | 258.77123    |     | HMF            |
| 10.422        | BV E | 47.78797     | 1.12189e-2 | 5.36130e-1   |     | DFF            |
| 11.400        |      | -            | -          | -            |     | FDCA           |
| 11.502        | VB   | 190.56761    | 1.02749e-1 | 19.58065     |     | Furfural       |

Fig. S46 Reaction conditions: Cellulose (162 mg), C-TsOH (10 mg), [EMIM]Cl (1 g, 7 mmol), 120 °C, 24 h

```

=====
Acq. Operator   : SYSTEM                      Seq. Line : 51
Acq. Instrument : HPLC-DAD                    Location  : P1-E-08
Injection Date  : 12/26/2021 8:10:05 AM      Inj       : 1
                                           Inj Volume: 10.000 µl
Acq. Method     : D:\DATA\2021\Thang 12\25-12-Hang_Trinh_Ha\2021-12-25-HMF 2021-12-25 17-04-50\HMF_cot 150_hat_nho.M
Last changed    : 11/30/2021 8:55:26 PM by SYSTEM
Analysis Method : D:\METHOD\HMF_cot 150_hat_nho_285nmKQ.M
Last changed    : 12/29/2021 10:03:33 PM by SYSTEM
Additional Info : Peak(s) manually integrated
  
```

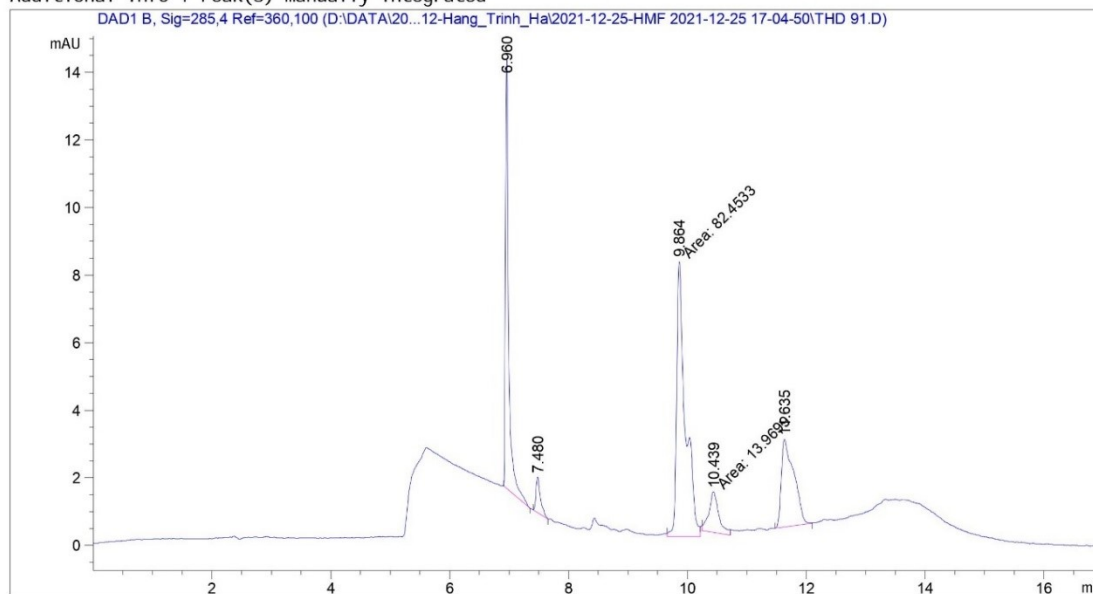

External Standard Report

```

Sorted By      : Signal
Calib. Data Modified : 12/29/2021 10:00:38 PM
Multiplier     : 1.0000
Dilution       : 1.0000
Do not use Multiplier & Dilution Factor with ISTDs
  
```

Signal 1: DAD1 B, Sig=285,4 Ref=360,100

| RetTime [min] | Type | Area [mAU*s] | Amt/Area   | Amount [ppm] | Grp | Name           |
|---------------|------|--------------|------------|--------------|-----|----------------|
| 8.900         | -    | -            | -          | -            | -   | Levulinic acid |
| 9.864         | MM   | 82.45334     | 4.81590e-3 | 3.97087e-1   | -   | HMF            |
| 10.439        | MM   | 13.96994     | 3.35088e-2 | 4.68116e-1   | -   | DFC            |
| 11.097        | -    | -            | -          | -            | -   | FDCA           |
| 11.635        | BB   | 37.87191     | 3.61751e-3 | 1.37002e-1   | -   | Furfural       |

Totals : 1.00221

Fig. S47 Reaction conditions: Cellulose (162 mg), C-TsOH (20 mg), [EMIM]Cl (1 g, 7 mmol), 120 °C, 2 h

```

=====
Acq. Operator   : SYSTEM                      Seq. Line : 56
Acq. Instrument : HPLC-DAD                    Location  : P1-F-04
Injection Date  : 12/26/2021 9:40:46 AM      Inj       : 1
                                           Inj Volume: 10.000 µl
Acq. Method     : D:\DATA\2021\Thang 12\25-12-Hang_Trinh_Ha\2021-12-25-HMF 2021-12-25 17-04-
                    50\HMF_cot 150_hat nho.M
Last changed    : 11/30/2021 8:55:26 PM by SYSTEM
Analysis Method : D:\METHOD\HMF_cot 150_hat nho_285nmKQ.M
Last changed    : 12/29/2021 10:03:33 PM by SYSTEM
Additional Info  : Peak(s) manually integrated
  
```

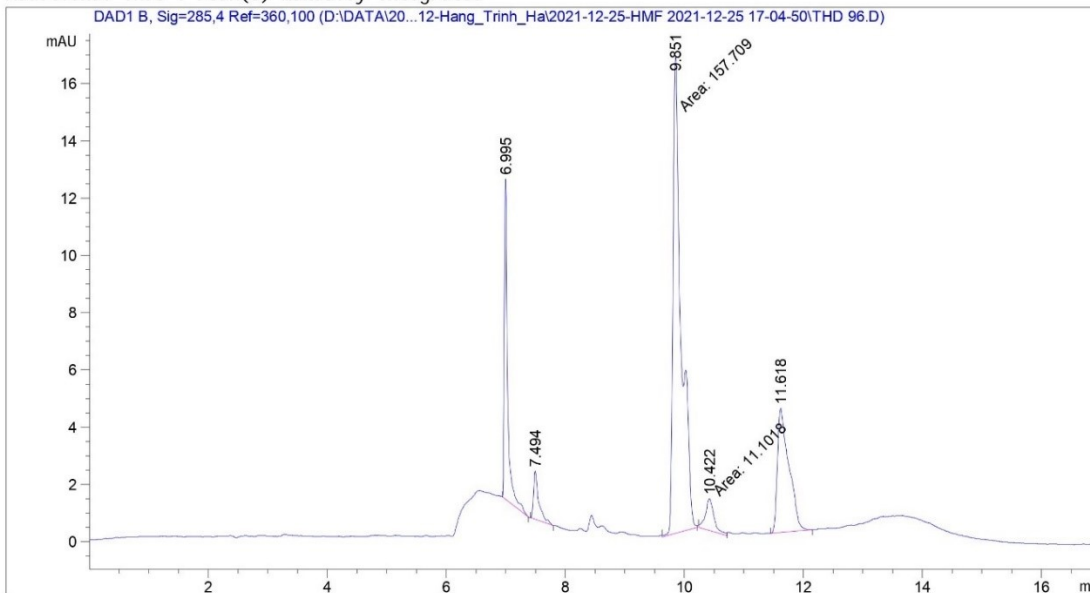

External Standard Report

```

=====
Sorted By      : Signal
Calib. Data Modified : 12/29/2021 10:00:38 PM
Multiplier     : 1.0000
Dilution       : 1.0000
Do not use Multiplier & Dilution Factor with ISTDs
  
```

Signal 1: DAD1 B, Sig=285,4 Ref=360,100

| RetTime [min] | Type | Area [mAU*s] | Amt/Area   | Amount [ppm] | Grp | Name           |
|---------------|------|--------------|------------|--------------|-----|----------------|
| 8.900         | -    | -            | -          | -            | -   | Levulinic acid |
| 9.851         | MM   | 157.70862    | 7.12235e-3 | 1.12326      | -   | HMF            |
| 10.422        | MM   | 11.10181     | 3.94785e-2 | 4.38282e-1   | -   | DFF            |
| 11.097        | -    | -            | -          | -            | -   | FDCA           |
| 11.618        | BB   | 58.24413     | 5.92531e-3 | 3.45114e-1   | -   | Furfural       |

Totals : 1.90665

Fig. S48 Reaction conditions: Cellulose (162 mg), C-TsOH (20 mg), [EMIM]Cl (1 g, 7 mmol), 120 °C, 4 h

```

=====
Acq. Operator   : SYSTEM                      Seq. Line : 61
Acq. Instrument : HPLC-DAD                   Location  : P1-F-09
Injection Date  : 12/26/2021 11:11:06 AM    Inj       : 1
                                           Inj Volume: 10.000 µl
Acq. Method     : D:\DATA\2021\Thang 12\25-12-Hang_Trinh_Ha\2021-12-25-HMF 2021-12-25 17-04-
                    50\HMF_cot 150_hat nho.M
Last changed    : 11/30/2021 8:55:26 PM by SYSTEM
Analysis Method : D:\METHOD\HMF_cot 150_hat nho_285nmKQ.M
Last changed    : 12/29/2021 10:03:33 PM by SYSTEM
Additional Info : Peak(s) manually integrated
  
```

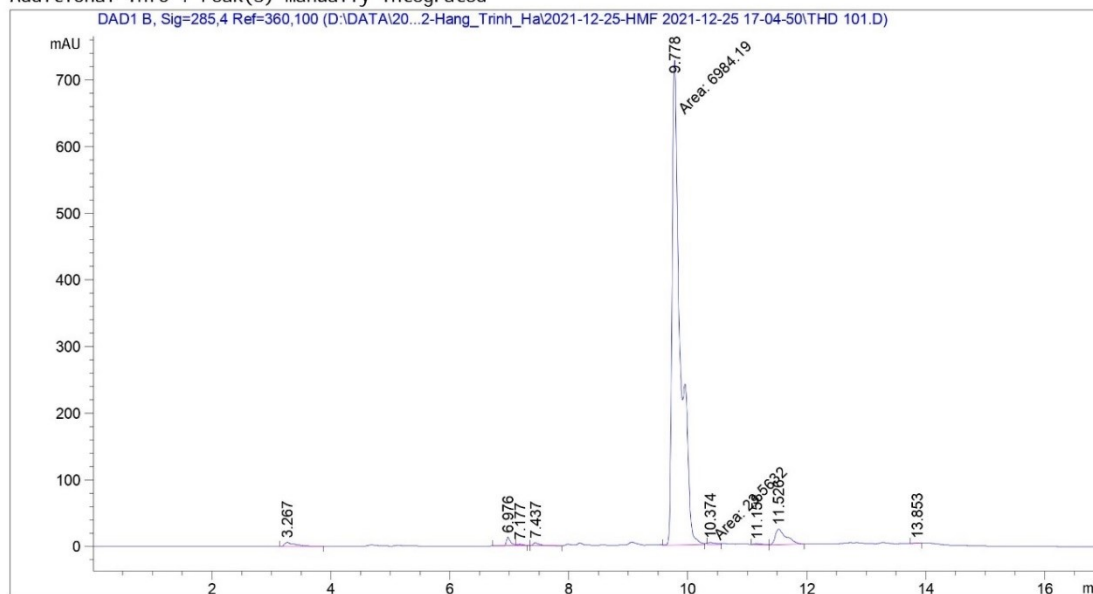

External Standard Report

```

=====
Sorted By      : Signal
Calib. Data Modified : 12/29/2021 10:00:38 PM
Multiplier     : 1.0000
Dilution       : 1.0000
Do not use Multiplier & Dilution Factor with ISTDs
  
```

Signal 1: DAD1 B, Sig=285,4 Ref=360,100

| RetTime [min] | Type | Area [mAU*s] | Amt/Area   | Amount [ppm] | Grp | Name           |
|---------------|------|--------------|------------|--------------|-----|----------------|
| 8.900         | -    | -            | -          | -            | -   | Levulinic acid |
| 9.778         | MM   | 6984.19043   | 9.59235e-3 | 66.99477     |     | HMF            |
| 10.374        | MM   | 23.56325     | 2.41013e-2 | 5.67904e-1   |     | DFP            |
| 11.158        | BB   | 9.96571      | 0.00000    | 0.00000      |     | FDCA           |
| 11.526        | BB   | 292.92328    | 9.36245e-3 | 2.74248      |     | Furfural       |

Totals : 70.30516

Fig. S49 Reaction conditions: Cellulose (162 mg), C-TsOH (20 mg), [EMIM]Cl (1 g, 7 mmol), 120 °C, 8 h

```

=====
Acq. Operator   : SYSTEM                               Seq. Line : 18
Acq. Instrument : HPLC-DAD                             Location  : P1-B-05
Injection Date  : 12/26/2021 7:30:43 PM                Inj       : 1
                                                    Inj Volume: 10.000 µl
Acq. Method    : D:\DATA\2021\Thang 12\26-12-Hang_Trinh_Ha\2021-12-26-HMF 2021-12-26 14-23-
                18\HMF_cot 150_hat nho.M
Last changed   : 11/30/2021 8:55:26 PM by SYSTEM
Analysis Method: D:\METHOD\HMF_cot 150_hat nho_KQ.M
Last changed   : 12/30/2021 4:03:08 AM by SYSTEM
                (modified after loading)
Additional Info : Peak(s) manually integrated
  
```

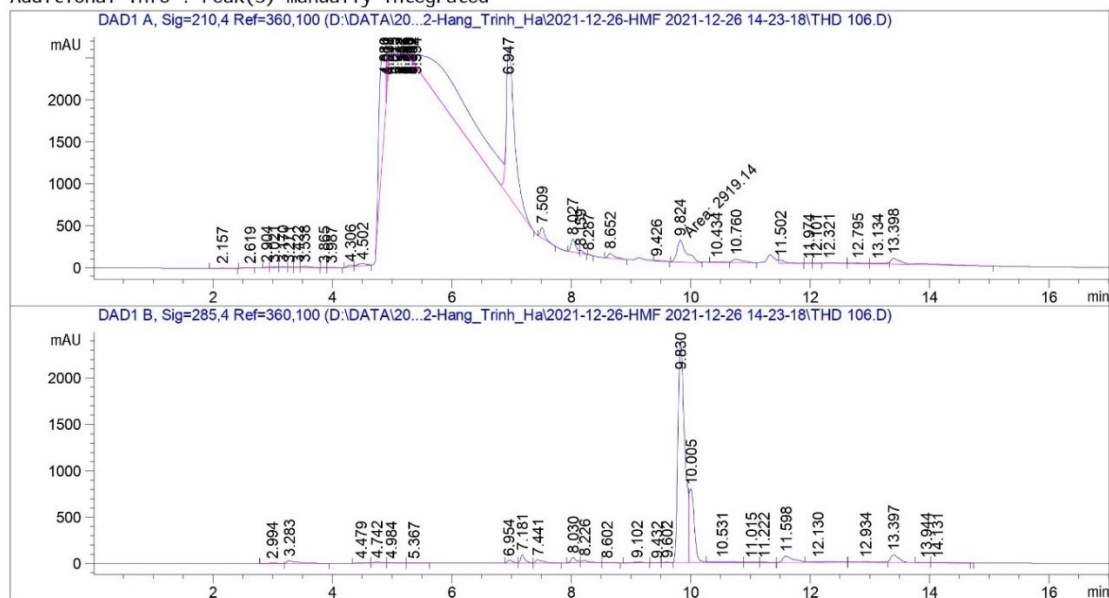

External Standard Report

```

=====
Sorted By      : Signal
Calib. Data Modified : 12/30/2021 4:03:42 AM
Multiplier    : 1.0000
Dilution      : 1.0000
Do not use Multiplier & Dilution Factor with ISTDs
  
```

Signal 1: DAD1 A, Sig=210,4 Ref=360,100

| RetTime [min] | Type | Area [mAU*s] | Amt/Area   | Amount [ppm] | Grp | Name           |
|---------------|------|--------------|------------|--------------|-----|----------------|
| 3.987         | VB   | 23.38481     | 1.50983    | 35.30699     |     | Formic acid    |
| 9.000         |      | -            | -          | -            |     | Levulinic acid |
| 9.426         | VB   | 79.35126     | 1.06103e-1 | 8.41941      |     | HMF            |
| 10.434        | BV E | 58.71129     | 2.06155e-2 | 1.21036      |     | DFF            |
| 11.400        |      | -            | -          | -            |     | FDCA           |
| 11.502        | VB   | 244.84567    | 1.03570e-1 | 25.35879     |     | Furfural       |

Fig. S50 Reaction conditions: Cellulose (162 mg), C-TsOH (20 mg), [EMIM]Cl (1 g, 7 mmol), 120 °C, 12 h



```

=====
Acq. Operator   : SYSTEM                               Seq. Line : 23
Acq. Instrument : HPLC-DAD                             Location  : P1-C-01
Injection Date  : 12/26/2021 9:01:00 PM                Inj       : 1
                                                    Inj Volume: 10.000 µl
Acq. Method    : D:\DATA\2021\Thang 12\26-12-Hang_Trinh_Ha\2021-12-26-HMF 2021-12-26 14-23-
                18\HMF_cot 150_hat nho.M
Last changed   : 11/30/2021 8:55:26 PM by SYSTEM
Analysis Method : D:\METHOD\HMF_cot 150_hat nho_KQ.M
Last changed   : 12/30/2021 4:11:12 AM by SYSTEM
                (modified after loading)
Additional Info : Peak(s) manually integrated
  
```

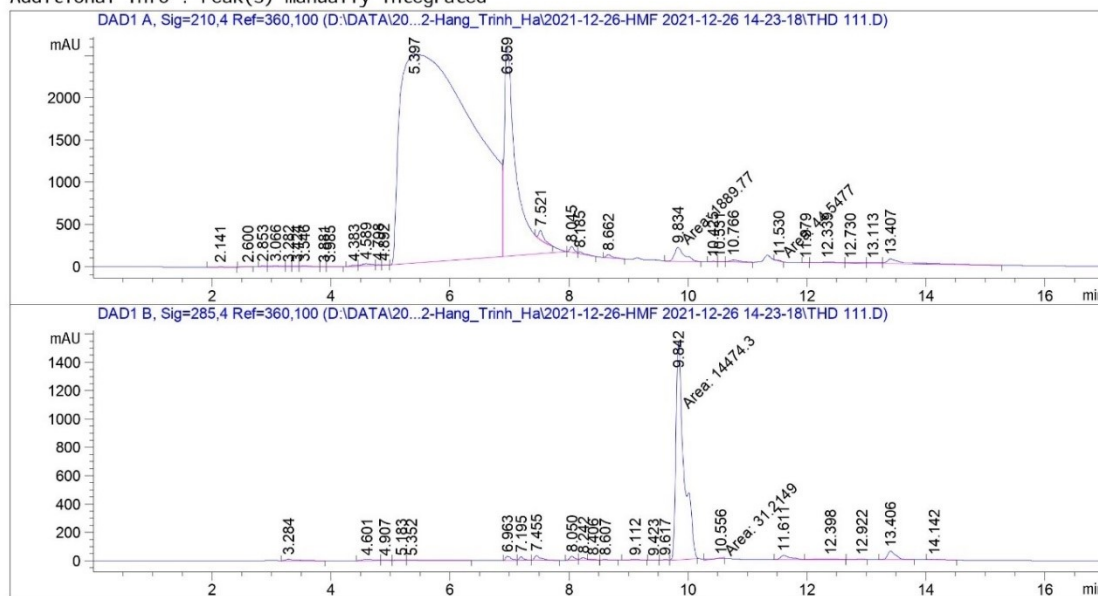

External Standard Report

```

Sorted By      : Signal
Calib. Data Modified : 12/30/2021 4:11:50 AM
Multiplier     : 1.0000
Dilution      : 1.0000
Do not use Multiplier & Dilution Factor with ISTDs
  
```

Signal 1: DAD1 A, Sig=210,4 Ref=360,100

| RetTime [min] | Type | Area [mAU*s] | Amt/Area   | Amount [ppm] | Grp | Name           |
|---------------|------|--------------|------------|--------------|-----|----------------|
| 3.985         | VB   | 13.44587     | 1.68329    | 22.63334     |     | Formic acid    |
| 9.100         |      | -            | -          | -            |     | Levulinic acid |
| 9.834         | MM   | 1889.77112   | 1.23030e-1 | 232.49784    |     | HMF            |
| 10.425        | BV   | 20.63692     | 0.00000    | 0.00000      |     | DFP            |
| 11.400        |      | -            | -          | -            |     | FDCA           |
| 11.530        | MM   | 44.54774     | 9.06035e-2 | 4.03618      |     | Furfural       |

Fig. S51 Reaction conditions: Cellulose (162 mg), C-TsOH (20 mg), [EMIM]Cl (1 g, 7 mmol), 120 °C, 18 h

```

=====
Acq. Operator   : SYSTEM                               Seq. Line : 16
Acq. Instrument : HPLC-DAD                           Location  : P1-B-03
Injection Date  : 12/26/2021 6:54:35 PM              Inj       : 1
                                                    Inj Volume: 10.000 µl
Acq. Method     : D:\DATA\2021\Thang 12\26-12-Hang_Trinh_Ha\2021-12-26-HMF 2021-12-26 14-23-
                  18\HMF_cot 150_hat nho.M
Last changed    : 11/30/2021 8:55:26 PM by SYSTEM
Analysis Method : D:\METHOD\HMF_cot 150_hat nho_KQ.M
Last changed    : 12/29/2021 10:49:23 PM by SYSTEM
Additional Info  : Peak(s) manually integrated
  
```

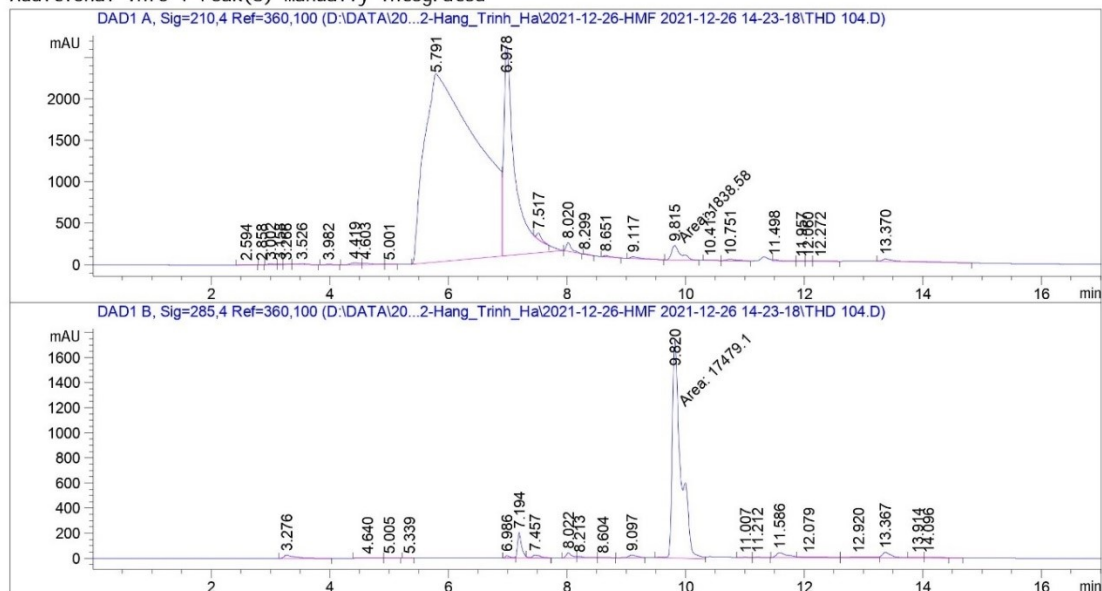

External Standard Report

```

=====
Sorted By      : Signal
Calib. Data Modified : 12/29/2021 10:46:14 PM
Multiplier     : 1.0000
Dilution       : 1.0000
Do not use Multiplier & Dilution Factor with ISTDs
  
```

Signal 1: DAD1 A, Sig=210,4 Ref=360,100

| RetTime [min] | Type | Area [mAU*s] | Amt/Area   | Amount [ppm] | Grp | Name           |
|---------------|------|--------------|------------|--------------|-----|----------------|
| 3.982         | BB   | 45.24859     | 1.39643    | 63.18662     |     | Formic acid    |
| 9.117         | BB   | 226.97638    | 3.45799    | 784.88141    |     | Levulinic acid |
| 9.815         | MM   | 1838.57800   | 1.23009e-1 | 226.16159    |     | HMF            |
| 10.413        | BV   | 46.92867     | 1.02941e-2 | 4.83090e-1   |     | DFF            |
| 11.400        |      | -            | -          | -            |     | FDCA           |
| 11.498        | VB   | 136.67831    | 1.01288e-1 | 13.84389     |     | Furfural       |

Fig. S52 Reaction conditions: Cellulose (162 mg), C-TsOH (20 mg), [EMIM]Cl (1 g, 7 mmol), 120 °C, 24 h

```

=====
Acq. Operator   : SYSTEM                      Seq. Line : 43
Acq. Instrument : HPLC-DAD                    Location  : P1-D-09
Injection Date  : 12/23/2021 6:49:22 AM      Inj       : 1
                                           Inj Volume: 10.000 µl
Acq. Method    : D:\DATA\2021\Thang 12\22-12-Hang_Trinh_Ha\2021-12-22-HMF 2021-12-22 18-08-06\HMF_cot 150_hat_nho.M
Last changed   : 11/30/2021 8:55:26 PM by SYSTEM
Analysis Method: D:\METHOD\HMF_cot 150_hat_nho_285nmKQ.M
Last changed   : 12/24/2021 11:12:35 AM by SYSTEM
                (modified after loading)
=====
  
```

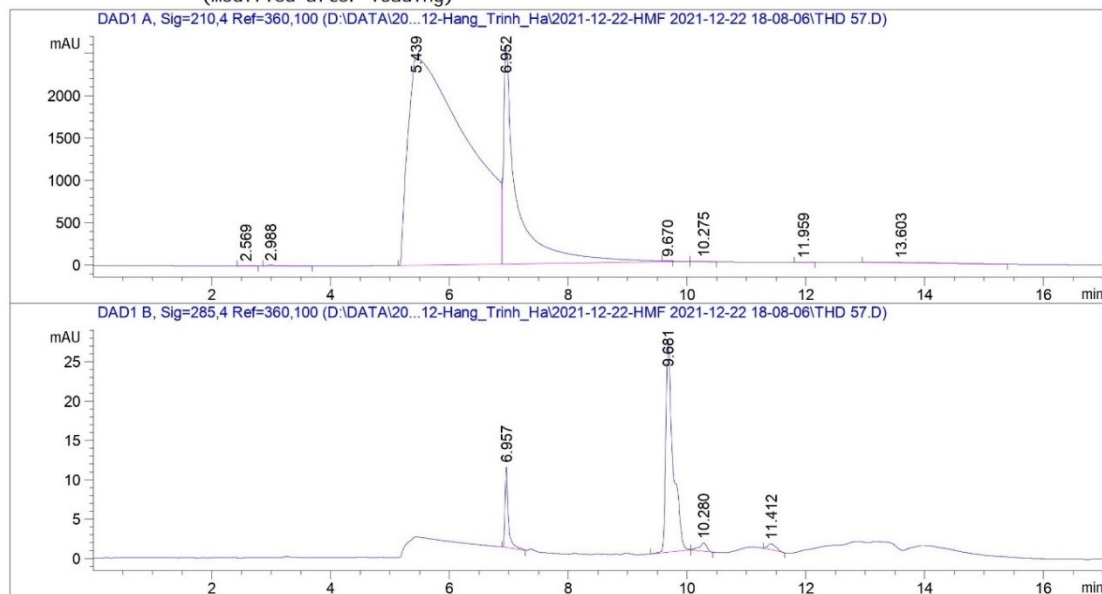

External Standard Report

```

=====
Sorted By      : Signal
Calib. Data Modified : 12/24/2021 11:13:44 AM
Multiplier     : 1.0000
Dilution       : 1.0000
Do not use Multiplier & Dilution Factor with ISTDs
=====
  
```

Signal 1: DAD1 A, Sig=210,4 Ref=360,100

Signal 2: DAD1 B, Sig=285,4 Ref=360,100

| RetTime [min] | Type | Area [mAU*s] | Amt/Area   | Amount [ppm] | Grp | Name           |
|---------------|------|--------------|------------|--------------|-----|----------------|
| 8.800         | -    | -            | -          | -            | -   | Levulinic acid |
| 9.681         | BB   | 228.67378    | 7.90658e-3 | 1.80803      | -   | HMF            |
| 10.280        | BB   | 9.17616      | 4.55803e-2 | 4.18252e-1   | -   | DFF            |
| 11.097        | -    | -            | -          | -            | -   | FDCA           |

Fig. S53 Reaction conditions: Cellulose (162 mg), C-HCl (1 mg), [EMIM]Cl (1 g, 7 mmol), 120 °C, 2 h

```

=====
Acq. Operator   : SYSTEM                      Seq. Line : 27
Acq. Instrument : HPLC-DAD                   Location  : P1-C-02
Injection Date  : 12/26/2021 12:55:47 AM     Inj       : 1
                                           Inj Volume: 10.000 µl
Acq. Method     : D:\DATA\2021\Thang 12\25-12-Hang_Trinh_Ha\2021-12-25-HMF 2021-12-25 17-04-50\HMF_cot 150_hat_nho.M
Last changed    : 11/30/2021 8:55:26 PM by SYSTEM
Analysis Method : D:\METHOD\HMF_cot 150_hat_nho_285nmKQ.M
Last changed    : 12/27/2021 12:50:01 PM by SYSTEM
Additional Info : Peak(s) manually integrated
  
```

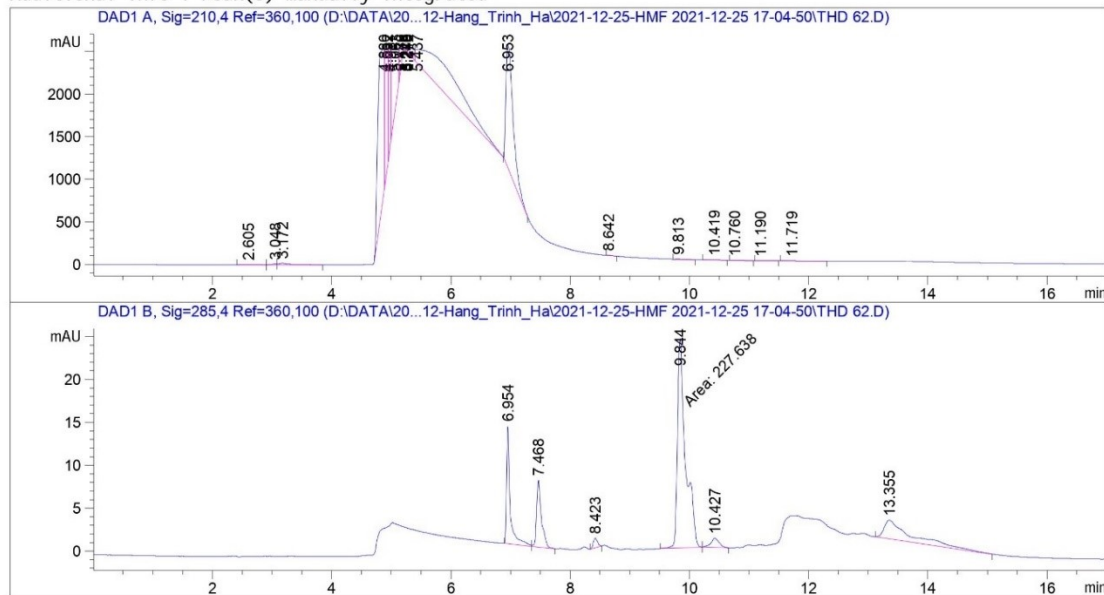

External Standard Report

```

Sorted By      : Signal
Calib. Data Modified : 12/27/2021 12:49:10 PM
Multiplier     : 1.0000
Dilution       : 1.0000
Do not use Multiplier & Dilution Factor with ISTDs
  
```

Signal 1: DAD1 A, Sig=210,4 Ref=360,100

Signal 2: DAD1 B, Sig=285,4 Ref=360,100

| RetTime [min] | Type | Area [mAU*s] | Amt/Area   | Amount [ppm] | Grp | Name           |
|---------------|------|--------------|------------|--------------|-----|----------------|
| 8.900         |      | -            | -          | -            |     | Levulinic acid |
| 9.844         | MM   | 227.63783    | 7.89865e-3 | 1.79803      |     | HMF            |
| 10.427        | BB   | 9.91554      | 4.29571e-2 | 4.25943e-1   |     | DFF            |
| 11.097        |      | -            | -          | -            |     | FDCA           |

Fig. S54 Reaction conditions: Cellulose (162 mg), C-HCl (1 mg), [EMIM]Cl (1 g, 7 mmol), 120 °C, 4 h

```

=====
Acq. Operator   : SYSTEM                      Seq. Line : 32
Acq. Instrument : HPLC-DAD                    Location  : P1-C-07
Injection Date  : 12/26/2021 2:26:11 AM      Inj       : 1
                                           Inj Volume: 10.000 µl
Acq. Method     : D:\DATA\2021\Thang 12\25-12-Hang_Trinh_Ha\2021-12-25-HMF 2021-12-25 17-04-50\HMF_cot 150_hat nho.M
Last changed    : 11/30/2021 8:55:26 PM by SYSTEM
Analysis Method : D:\METHOD\HMF_cot 150_hat nho_285nmKQ.M
Last changed    : 12/29/2021 10:03:33 PM by SYSTEM
Additional Info : Peak(s) manually integrated
  
```

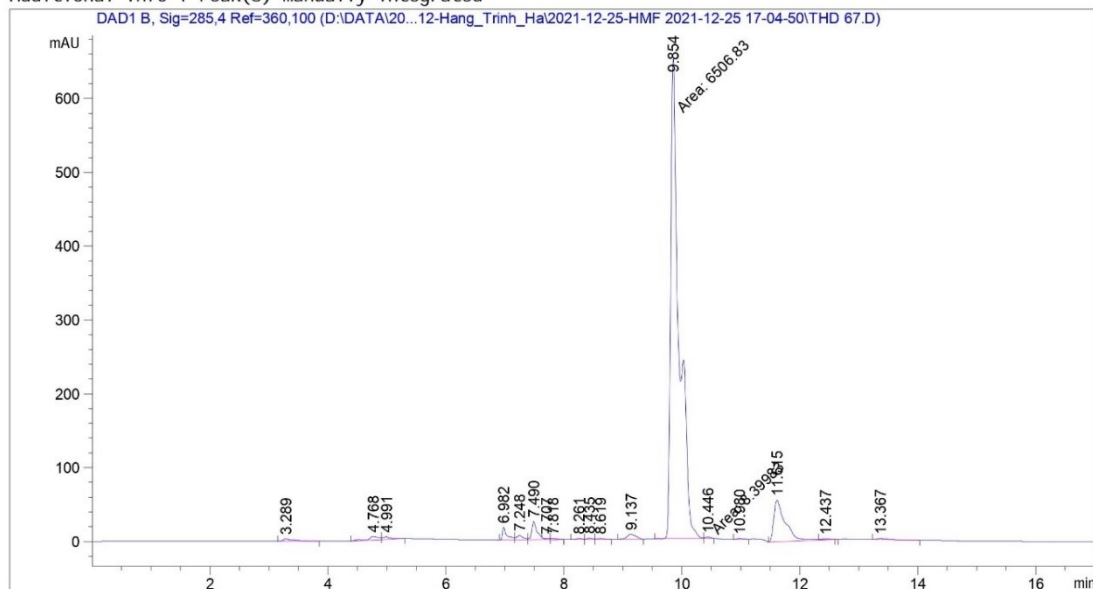

External Standard Report

```

Sorted By      : Signal
Calib. Data Modified : 12/29/2021 10:00:38 PM
Multiplier     : 1.0000
Dilution       : 1.0000
Do not use Multiplier & Dilution Factor with ISTDs
  
```

Signal 1: DAD1 B, Sig=285,4 Ref=360,100

| RetTime [min] | Type | Area [mAU*s] | Amt/Area   | Amount [ppm] | Grp | Name           |
|---------------|------|--------------|------------|--------------|-----|----------------|
| 8.900         |      | -            | -          | -            |     | Levulinic acid |
| 9.854         | MM   | 6506.83203   | 9.58816e-3 | 62.38855     |     | HMF            |
| 10.446        | MM   | 8.39983      | 4.88315e-2 | 4.10177e-1   |     | DFF            |
| 10.980        | BB   | 6.84729      | 0.00000    | 0.00000      |     | FDCA           |
| 11.615        | BV R | 764.17719    | 9.88851e-3 | 7.55657      |     | Furfural       |

Totals : 70.35530

Fig. S55 Reaction conditions: Cellulose (162 mg), C-HCl (1 mg), [EMIM]Cl (1 g, 7 mmol), 120 °C, 8 h



```

=====
Acq. Operator   : SYSTEM                      Seq. Line : 37
Acq. Instrument : HPLC-DAD                    Location  : P1-D-03
Injection Date  : 12/26/2021 3:56:48 AM      Inj       : 1
                                           Inj Volume: 10.000 µl
Acq. Method    : D:\DATA\2021\Thang 12\25-12-Hang_Trinh_Ha\2021-12-25-HMF 2021-12-25 17-04-50\HMF_cot 150_hat_nho.M
Last changed   : 11/30/2021 8:55:26 PM by SYSTEM
Analysis Method: D:\METHOD\HMF_cot 150_hat_nho_285nmKQ.M
Last changed   : 12/29/2021 11:17:48 PM by SYSTEM
                (modified after loading)
Additional Info : Peak(s) manually integrated
  
```

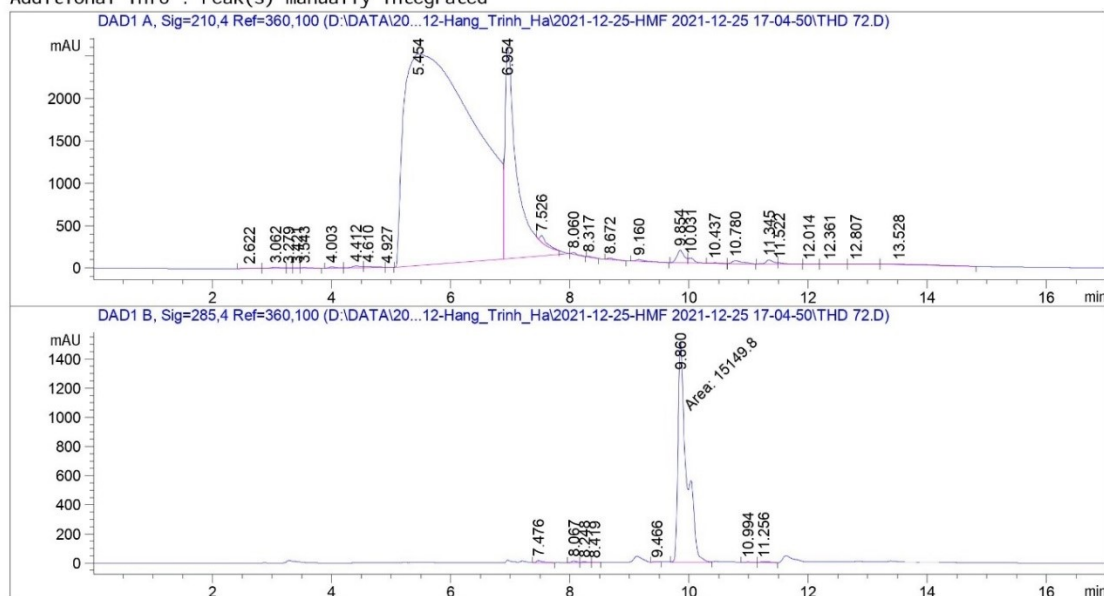

External Standard Report

```

Sorted By      : Signal
Calib. Data Modified : 12/29/2021 11:18:35 PM
Multiplier     : 1.0000
Dilution      : 1.0000
Do not use Multiplier & Dilution Factor with ISTDs
  
```

Signal 1: DAD1 A, Sig=210,4 Ref=360,100

Signal 2: DAD1 B, Sig=285,4 Ref=360,100

| RetTime [min] | Type | Area [mAU*s] | Amt/Area   | Amount [ppm] | Grp | Name           |
|---------------|------|--------------|------------|--------------|-----|----------------|
| 8.900         | -    | -            | -          | -            | -   | Levulinic acid |
| 9.860         | MM   | 1.51498e4    | 9.62310e-3 | 145.78803    |     | HMF            |
| 10.401        | -    | -            | -          | -            |     | DFF            |

Fig. S56 Reaction conditions: Cellulose (162 mg), C-HCl (1 mg), [EMIM]Cl (1 g, 7 mmol), 120 °C, 12 h

```

=====
Acq. Operator   : SYSTEM                      Seq. Line : 42
Acq. Instrument : HPLC-DAD                   Location  : P1-D-08
Injection Date  : 12/26/2021 5:27:25 AM      Inj       : 1
                                           Inj Volume: 10.000 µl
Acq. Method    : D:\DATA\2021\Thang 12\25-12-Hang_Trinh_Ha\2021-12-25-HMF 2021-12-25 17-04-50\HMF_cot 150_hat_nho.M
Last changed   : 11/30/2021 8:55:26 PM by SYSTEM
Analysis Method: D:\METHOD\HMF_cot 150_hat_nho_KQ.M
Last changed   : 12/30/2021 12:02:08 AM by SYSTEM
                (modified after loading)
Additional Info : Peak(s) manually integrated
  
```

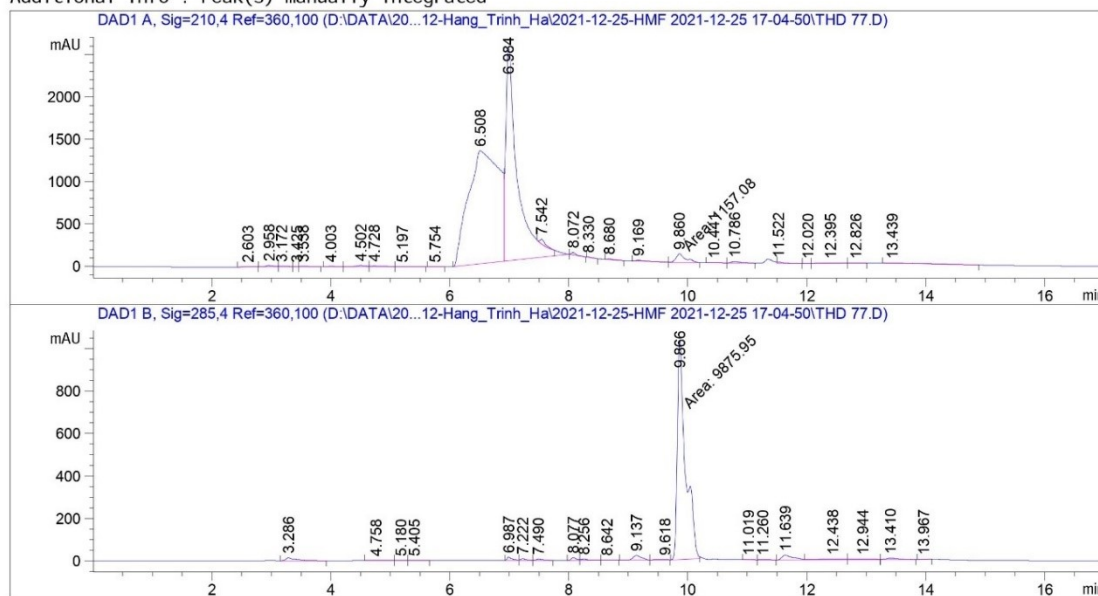

External Standard Report

```

=====
Sorted By      : Signal
Calib. Data Modified : 12/30/2021 12:02:52 AM
Multiplier     : 1.0000
Dilution      : 1.0000
Do not use Multiplier & Dilution Factor with ISTDs
  
```

Signal 1: DAD1 A, Sig=210,4 Ref=360,100

| RetTime [min] | Type | Area [mAU*s] | Amt/Area   | Amount [ppm] | Grp | Name           |
|---------------|------|--------------|------------|--------------|-----|----------------|
| 4.003         | BB   | 46.29803     | 1.39368    | 64.52481     |     | Formic acid    |
| 9.169         | BB   | 123.45938    | 3.47868    | 429.47599    |     | Levulinic acid |
| 9.860         | MM   | 1157.07947   | 1.22560e-1 | 141.81147    |     | HMF            |
| 10.441        | VV   | 43.36400     | 6.06639e-3 | 2.63063e-1   |     | DFF            |
| 11.400        |      | -            | -          | -            |     | FDCA           |
| 11.522        | VB   | 107.17141    | 9.98657e-2 | 10.70275     |     | Furfural       |

Fig. S57 Reaction conditions: Cellulose (162 mg), C-HCl (1 mg), [EMIM]Cl (1 g, 7 mmol), 120 °C, 18 h

```

=====
Acq. Operator   : SYSTEM                      Seq. Line : 24
Acq. Instrument : HPLC-DAD                   Location  : P1-C-02
Injection Date  : 12/26/2021 9:19:31 PM      Inj       : 1
                                           Inj Volume: 10.000 µl
Acq. Method    : D:\DATA\2021\Thang 12\26-12-Hang_Trinh_Ha\2021-12-26-HMF 2021-12-26 14-23-18\HMF_cot 150_hat nho.M
Last changed   : 11/30/2021 8:55:26 PM by SYSTEM
Analysis Method : D:\METHOD\HMF_cot 150_hat nho_KQ.M
Last changed   : 12/29/2021 10:49:23 PM by SYSTEM
Additional Info : Peak(s) manually integrated
  
```

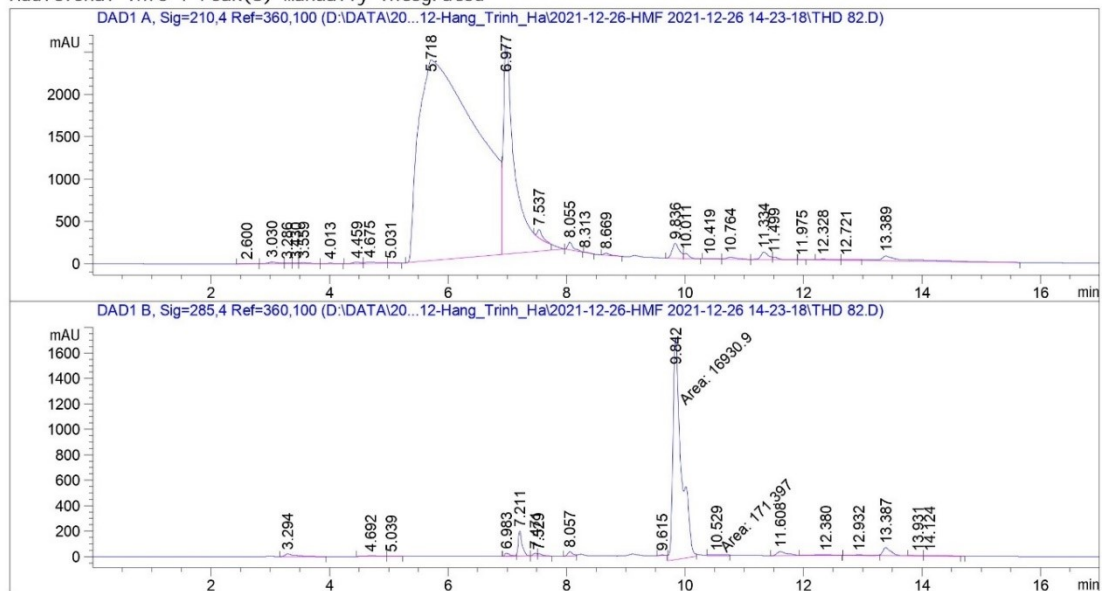

External Standard Report

```

Sorted By      : Signal
Calib. Data Modified : 12/29/2021 10:46:14 PM
Multiplier    : 1.0000
Dilution      : 1.0000
Do not use Multiplier & Dilution Factor with ISTDs
  
```

Signal 1: DAD1 A, Sig=210,4 Ref=360,100

| RetTime [min] | Type | Area [mAU*s] | Amt/Area   | Amount [ppm] | Grp | Name           |
|---------------|------|--------------|------------|--------------|-----|----------------|
| 4.013         | BB   | 38.37037     | 1.41817    | 54.41585     |     | Formic acid    |
| 8.900         |      | -            | -          | -            |     | Levulinic acid |
| 9.836         | BV   | 1518.73718   | 1.22848e-1 | 186.57440    |     | HMF            |
| 10.419        | BV   | 59.54186     | 2.11890e-2 | 1.26163      |     | DFF            |
| 11.334        | BV   | 796.50177    | 1.97459e-1 | 157.27661    |     | FDCA           |
| 11.499        | VB   | 190.42552    | 1.02746e-1 | 19.56552     |     | Furfural       |

Fig. S58 Reaction conditions: Cellulose (162 mg), C-HCl (1 mg), [EMIM]Cl (1 g, 7 mmol), 120 °C, 24 h

```

=====
Acq. Operator   : SYSTEM                      Seq. Line : 44
Acq. Instrument : HPLC-DAD                   Location  : P1-E-01
Injection Date  : 12/23/2021 7:07:39 AM      Inj       : 1
                                           Inj Volume: 10.000 µl
Acq. Method    : D:\DATA\2021\Thang 12\22-12-Hang_Trinh_Ha\2021-12-22-HMF 2021-12-22 18-08-06\HMF_cot 150_hat_nho.M
Last changed   : 11/30/2021 8:55:26 PM by SYSTEM
Analysis Method: D:\METHOD\HMF_cot 150_hat_nho_285nmKQ.M
Last changed   : 12/24/2021 11:12:35 AM by SYSTEM
                (modified after loading)
=====
  
```

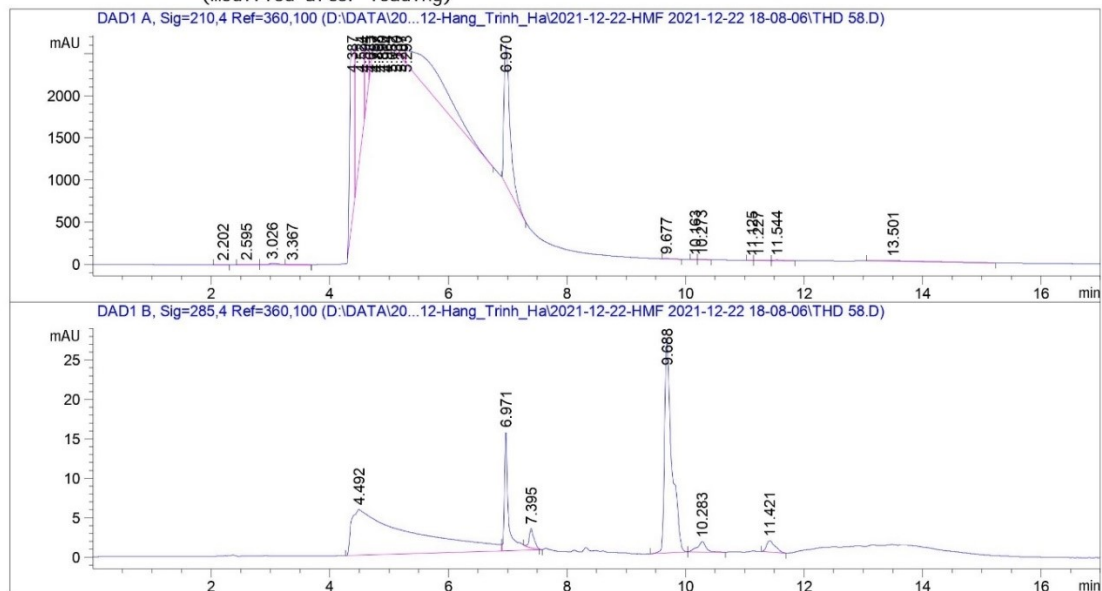

External Standard Report

```

=====
Sorted By      : Signal
Calib. Data Modified : 12/24/2021 11:13:44 AM
Multiplier     : 1.0000
Dilution      : 1.0000
Do not use Multiplier & Dilution Factor with ISTDs
  
```

Signal 1: DAD1 A, Sig=210,4 Ref=360,100

Signal 2: DAD1 B, Sig=285,4 Ref=360,100

| RetTime [min] | Type | Area [mAU*s] | Amt/Area   | Amount [ppm] | Grp | Name           |
|---------------|------|--------------|------------|--------------|-----|----------------|
| 8.800         | -    | -            | -          | -            | -   | Levulinic acid |
| 9.688         | BB   | 227.81734    | 7.90003e-3 | 1.79976      | -   | HMF            |
| 10.283        | BB   | 12.82768     | 3.55664e-2 | 4.56234e-1   | -   | DFF            |
| 11.097        | -    | -            | -          | -            | -   | FDCA           |

Fig. S59 Reaction conditions: Cellulose (162 mg), C-HCl (5 mg), [EMIM]Cl (1 g, 7 mmol), 120 °C, 2 h

```

=====
Acq. Operator   : SYSTEM                      Seq. Line :   33
Acq. Instrument : HPLC-DAD                    Location  : P1-C-08
Injection Date  : 12/26/2021 2:44:17 AM      Inj       :    1
                                           Inj Volume: 10.000 µl
Acq. Method    : D:\DATA\2021\Thang 12\25-12-Hang_Trinh_Ha\2021-12-25-HMF 2021-12-25 17-04-
                    50\HMF_cot 150_hat nho.M
Last changed   : 11/30/2021 8:55:26 PM by SYSTEM
Analysis Method: D:\METHOD\HMF_cot 150_hat nho_285nmKQ.M
Last changed   : 12/29/2021 10:03:33 PM by SYSTEM
Additional Info: Peak(s) manually integrated
  
```

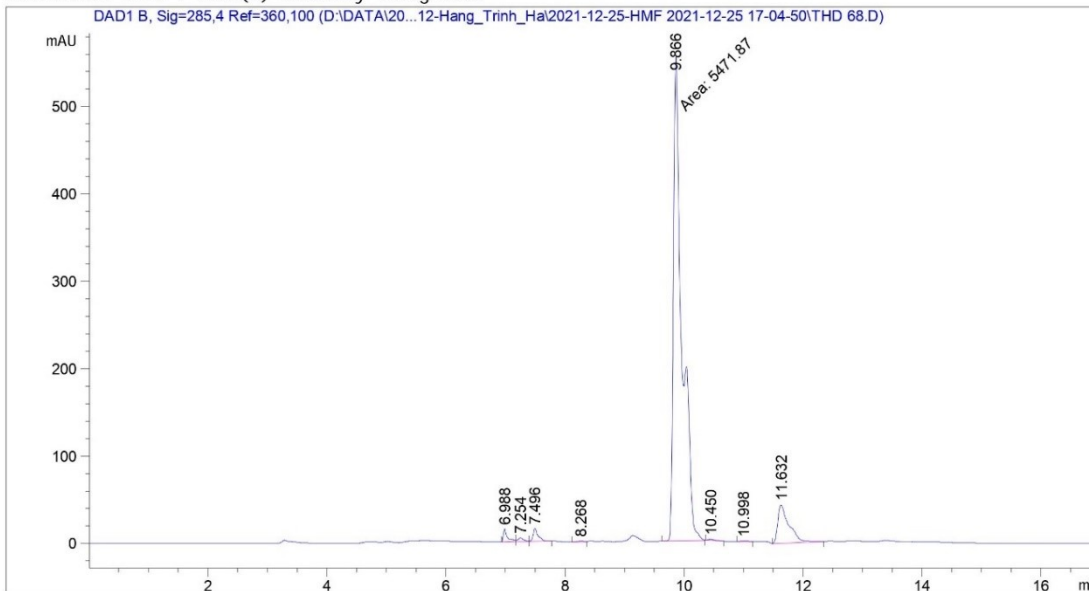

External Standard Report

```

=====
Sorted By      : Signal
Calib. Data Modified : 12/29/2021 10:00:38 PM
Multiplier     : 1.0000
Dilution      : 1.0000
Do not use Multiplier & Dilution Factor with ISTDs
  
```

Signal 1: DAD1 B, Sig=285,4 Ref=360,100

| RetTime [min] | Type | Area [mAU*s] | Amt/Area   | Amount [ppm] | Grp | Name           |
|---------------|------|--------------|------------|--------------|-----|----------------|
| 8.900         | -    | -            | -          | -            | -   | Levulinic acid |
| 9.866         | MM   | 5471.86523   | 9.57658e-3 | 52.40173     |     | HMF            |
| 10.450        | BB   | 9.64674      | 4.38642e-2 | 4.23147e-1   |     | DFP            |
| 10.998        | BB   | 5.05110      | 0.00000    | 0.00000      |     | FDCA           |
| 11.632        | BB   | 570.64856    | 9.77761e-3 | 5.57958      |     | Furfural       |

Totals : 58.40446

Fig. S60 Reaction conditions: Cellulose (162 mg), C-HCl (5 mg), [EMIM]Cl (1 g, 7 mmol), 120 °C, 8 h



```

=====
Acq. Operator   : SYSTEM                      Seq. Line :   38
Acq. Instrument : HPLC-DAD                    Location  : P1-D-04
Injection Date  : 12/26/2021 4:14:55 AM      Inj       :    1
                                           Inj Volume: 10.000 µl
Acq. Method    : D:\DATA\2021\Thang 12\25-12-Hang_Trinh_Ha\2021-12-25-HMF 2021-12-25 17-04-
                    50\HMF_cot 150_hat nho.M
Last changed   : 11/30/2021 8:55:26 PM by SYSTEM
Analysis Method: D:\METHOD\HMF_cot 150_hat nho_285nmKQ.M
Last changed   : 12/29/2021 11:17:48 PM by SYSTEM
                    (modified after loading)
Additional Info : Peak(s) manually integrated
  
```

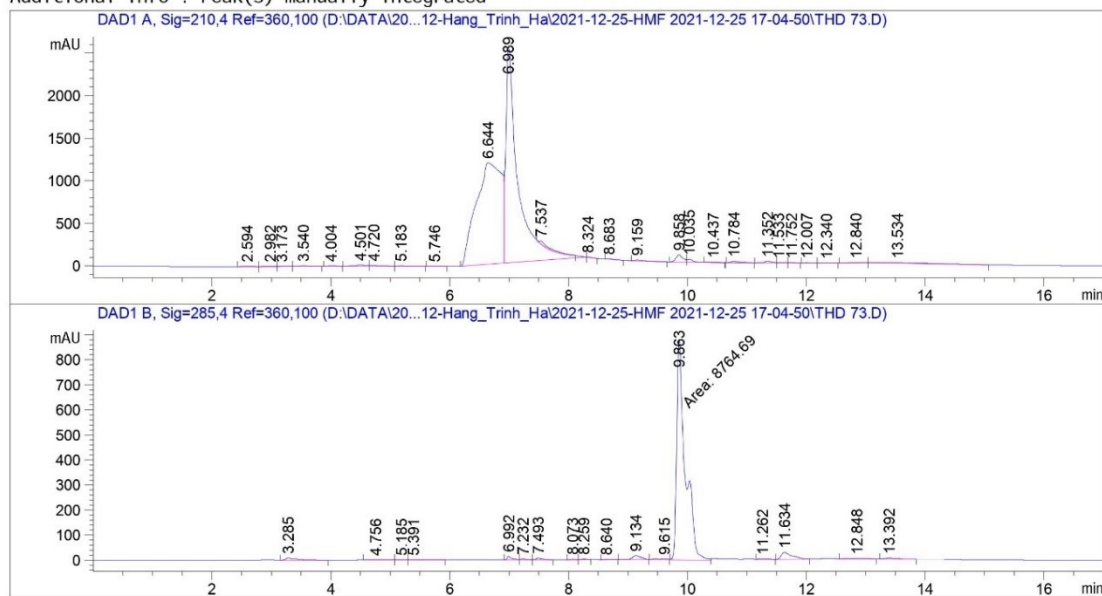

External Standard Report

```

Sorted By      : Signal
Calib. Data Modified : 12/29/2021 11:18:35 PM
Multiplier     : 1.0000
Dilution       : 1.0000
Do not use Multiplier & Dilution Factor with ISTDs
  
```

Signal 1: DAD1 A, Sig=210,4 Ref=360,100

Signal 2: DAD1 B, Sig=285,4 Ref=360,100

| RetTime [min] | Type | Area [mAU*s] | Amt/Area   | Amount [ppm] | Grp | Name           |
|---------------|------|--------------|------------|--------------|-----|----------------|
| 8.900         | -    | -            | -          | -            | -   | Levulinic acid |
| 9.863         | MM   | 8764.69336   | 9.60394e-3 | 84.17557     | -   | HMF            |
| 10.401        | -    | -            | -          | -            | -   | DFF            |

Fig. S61 Reaction conditions: Cellulose (162 mg), C-HCl (5 mg), [EMIM]Cl (1 g, 7 mmol), 120 °C, 12 h

```

=====
Acq. Operator   : SYSTEM                      Seq. Line   : 44
Acq. Instrument : HPLC-DAD                     Location    : P1-E-01
Injection Date  : 12/26/2021 6:03:34 AM      Inj         : 1
                                           Inj Volume  : 10.000 µl
Acq. Method     : D:\DATA\2021\Thang 12\25-12-Hang_Trinh_Ha\2021-12-25-HMF 2021-12-25 17-04-50\HMF_cot 150_hat_nho.M
Last changed    : 11/30/2021 8:55:26 PM by SYSTEM
Analysis Method : D:\METHOD\HMF_cot 150_hat_nho_KQ.M
Last changed    : 12/30/2021 12:42:33 AM by SYSTEM
                  (modified after loading)
Additional Info  : Peak(s) manually integrated
  
```

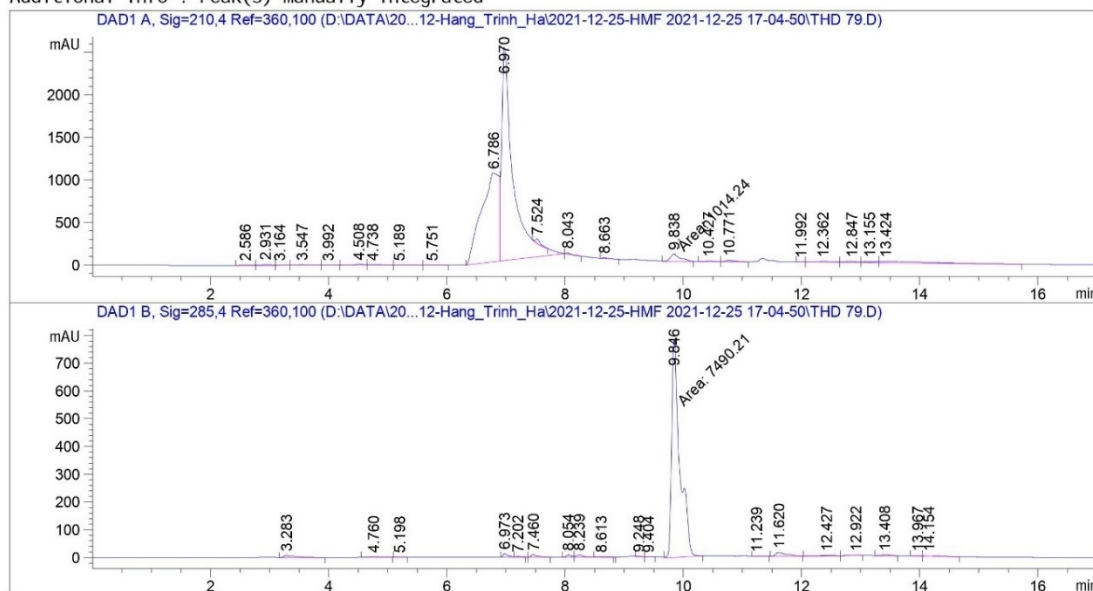

External Standard Report

```

Sorted By      : Signal
Calib. Data Modified : 12/30/2021 12:42:12 AM
Multiplier     : 1.0000
Dilution      : 1.0000
Do not use Multiplier & Dilution Factor with ISTDs
  
```

Signal 1: DAD1 A, Sig=210,4 Ref=360,100

| RetTime [min] | Type | Area [mAU*s] | Amt/Area   | Amount [ppm] | Grp | Name           |
|---------------|------|--------------|------------|--------------|-----|----------------|
| 3.992         | BB   | 6.25105      | 2.15306    | 13.45885     |     | Formic acid    |
| 9.100         |      | -            | -          | -            |     | Levulinic acid |
| 9.838         | MM   | 1014.24200   | 1.22389e-1 | 124.13226    |     | HMF            |
| 10.427        | BV   | 43.74559     | 6.55189e-3 | 2.86616e-1   |     | DFF            |
| 11.400        |      | -            | -          | -            |     | FDCA           |
| 11.500        |      | -            | -          | -            |     | Furfural       |

Fig. S62 Reaction conditions: Cellulose (162 mg), C-HCl (5 mg), [EMIM]Cl (1 g, 7 mmol), 120 °C, 18 h

```

=====
Acq. Operator   : SYSTEM                      Seq. Line : 25
Acq. Instrument : HPLC-DAD                   Location  : P1-C-03
Injection Date  : 12/26/2021 9:37:32 PM      Inj       : 1
                                           Inj Volume: 10.000 µl
Acq. Method    : D:\DATA\2021\Thang 12\26-12-Hang_Trinh_Ha\2021-12-26-HMF 2021-12-26 14-23-18\HMF_cot 150_hat_nho.M
Last changed   : 11/30/2021 8:55:26 PM by SYSTEM
Analysis Method: D:\METHOD\HMF_cot 150_hat_nho_285nmKQ.M
Last changed   : 12/29/2021 10:03:33 PM by SYSTEM
Additional Info: Peak(s) manually integrated
  
```

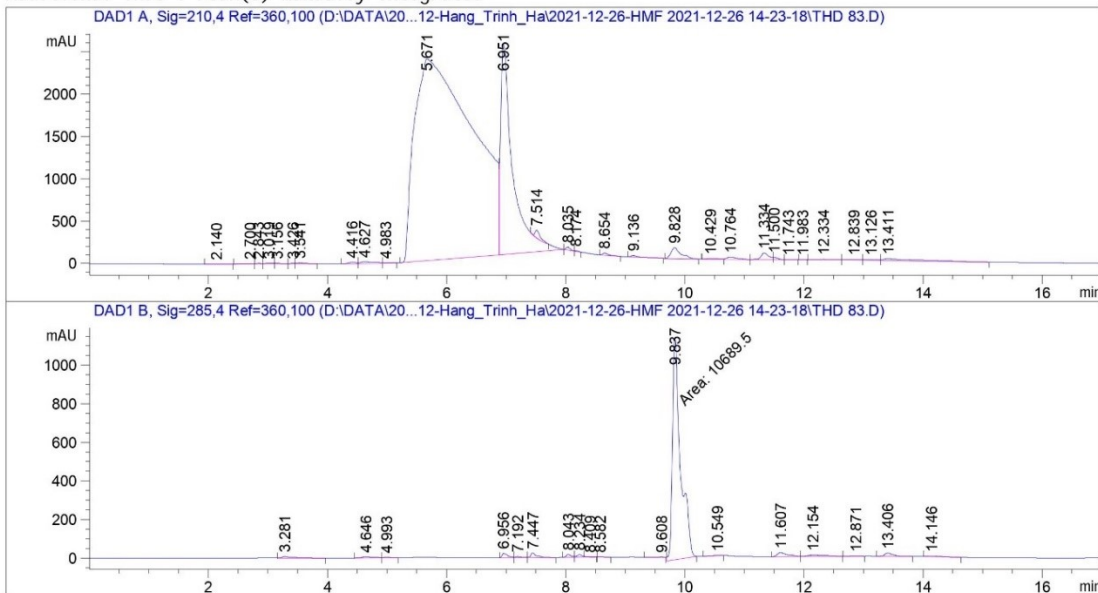

External Standard Report

```

Sorted By      : Signal
Calib. Data Modified : 12/29/2021 10:00:38 PM
Multiplier     : 1.0000
Dilution       : 1.0000
Do not use Multiplier & Dilution Factor with ISTDs
  
```

Signal 1: DAD1 A, Sig=210,4 Ref=360,100

Signal 2: DAD1 B, Sig=285,4 Ref=360,100

| RetTime [min] | Type | Area [mAU*s] | Amt/Area   | Amount [ppm] | Grp | Name           |
|---------------|------|--------------|------------|--------------|-----|----------------|
| 8.900         |      | -            | -          | -            |     | Levulinic acid |
| 9.837         | MM   | 1.06895e4    | 9.61213e-3 | 102.74915    |     | HMF            |
| 10.549        | BB   | 20.03700     | 2.65122e-2 | 5.31225e-1   |     | DFP            |
| 11.097        |      | -            | -          | -            |     | FDCA           |

Fig. S63 Reaction conditions: Cellulose (162 mg), C-HCl (5 mg), [EMIM]Cl (1 g, 7 mmol), 120 °C, 24 h

```

=====
Acq. Operator   : SYSTEM                      Seq. Line : 45
Acq. Instrument : HPLC-DAD                   Location  : P1-E-02
Injection Date  : 12/23/2021 7:25:43 AM      Inj       : 1
                                           Inj Volume: 10.000 µl
Acq. Method     : D:\DATA\2021\Thang 12\22-12-Hang_Trinh_Ha\2021-12-22-HMF 2021-12-22 18-08-06\HMF_cot 150_hat_nho.M
Last changed    : 11/30/2021 8:55:26 PM by SYSTEM
Analysis Method : D:\METHOD\HMF_cot 150_hat_nho_285nmKQ.M
Last changed    : 12/24/2021 11:12:35 AM by SYSTEM
                (modified after loading)
Additional Info : Peak(s) manually integrated
  
```

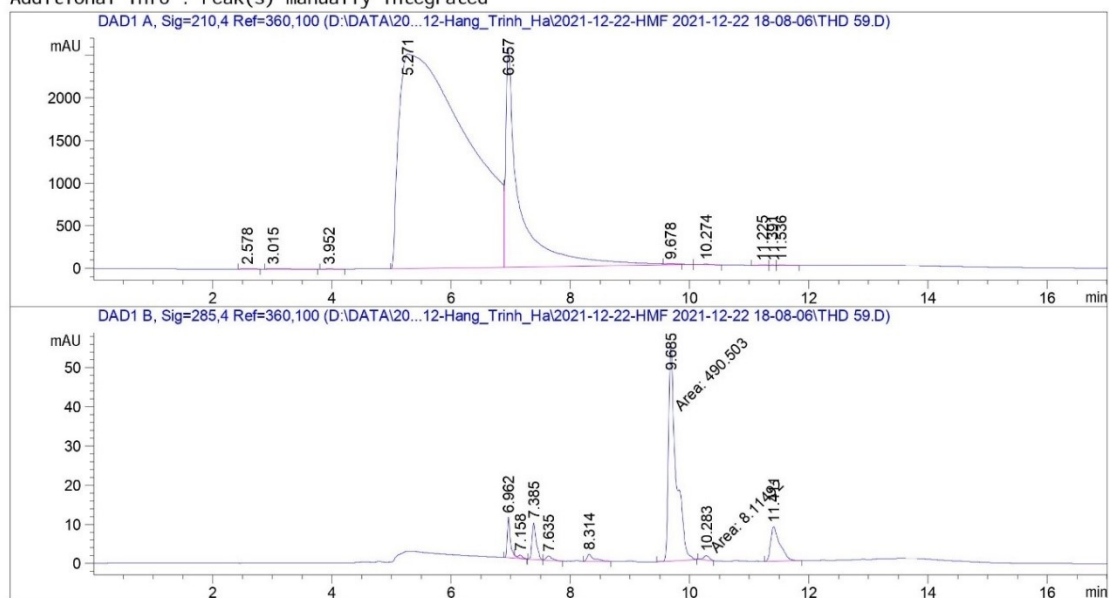

External Standard Report

```

=====
Sorted By      : Signal
Calib. Data Modified : 12/24/2021 11:12:35 AM
Multiplier     : 1.0000
Dilution       : 1.0000
Do not use Multiplier & Dilution Factor with ISTDs
  
```

Signal 1: DAD1 A, Sig=210,4 Ref=360,100

Signal 2: DAD1 B, Sig=285,4 Ref=360,100

| RetTime [min] | Type | Area [mAU*s] | Amt/Area   | Amount [ppm] | Grp | Name           |
|---------------|------|--------------|------------|--------------|-----|----------------|
| 8.800         | -    | -            | -          | -            | -   | Levulinic acid |
| 9.685         | MM   | 490.50342    | 8.83690e-3 | 4.33453      |     | HMF            |
| 10.283        | MM   | 8.11492      | 5.01808e-2 | 4.07213e-1   |     | DFF            |

Fig. S64 Reaction conditions: Cellulose (162 mg), C-HCl (8 mg), [EMIM]Cl (1 g, 7 mmol), 120 °C, 2 h

```

=====
Acq. Operator   : SYSTEM                      Seq. Line :   34
Acq. Instrument : HPLC-DAD                   Location  : P1-C-09
Injection Date  : 12/26/2021 3:02:34 AM      Inj       :    1
                                           Inj Volume: 10.000 µl
Acq. Method     : D:\DATA\2021\Thang 12\25-12-Hang_Trinh_Ha\2021-12-25-HMF 2021-12-25 17-04-
                    50\HMF_cot 150_hat nho.M
Last changed    : 11/30/2021 8:55:26 PM by SYSTEM
Analysis Method : D:\METHOD\HMF_cot 150_hat nho_285nmKQ.M
Last changed    : 12/29/2021 10:03:33 PM by SYSTEM
Additional Info  : Peak(s) manually integrated
  
```

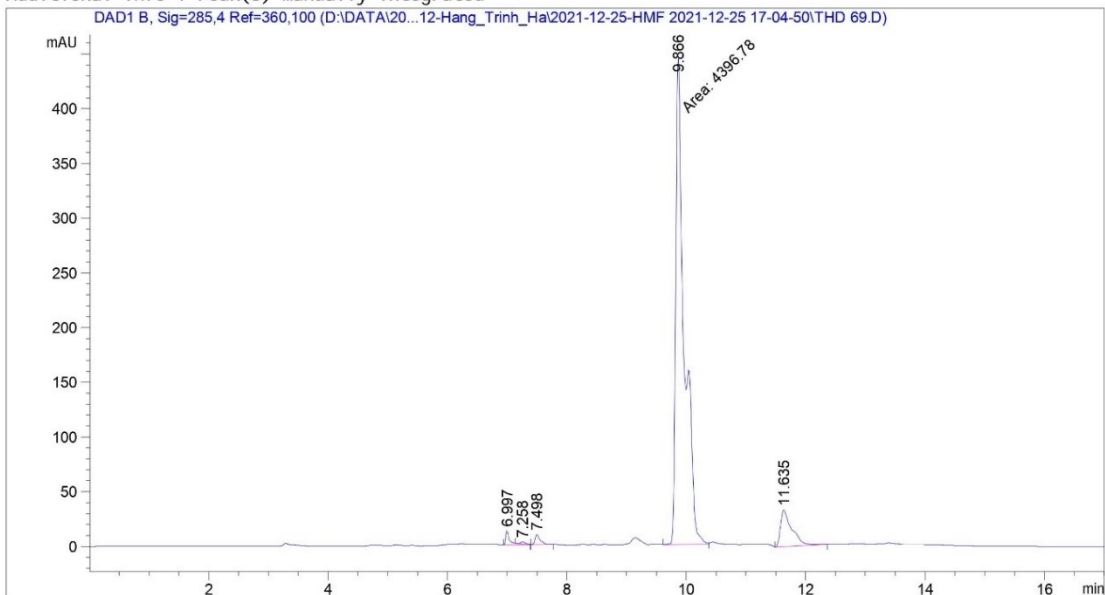

External Standard Report

```

=====
Sorted By       : Signal
Calib. Data Modified : 12/29/2021 10:00:38 PM
Multiplier      : 1.0000
Dilution        : 1.0000
Do not use Multiplier & Dilution Factor with ISTDs
  
```

Signal 1: DAD1 B, Sig=285,4 Ref=360,100

| RetTime [min] | Type | Area [mAU*s] | Amt/Area   | Amount [ppm] | Grp | Name           |
|---------------|------|--------------|------------|--------------|-----|----------------|
| 8.900         |      | -            | -          | -            |     | Levulinic acid |
| 9.866         | MM   | 4396.78125   | 9.55877e-3 | 42.02780     |     | HMF            |
| 10.401        |      | -            | -          | -            |     | DFF            |
| 11.097        |      | -            | -          | -            |     | FDCA           |
| 11.635        | BB   | 436.15359    | 9.64258e-3 | 4.20565      |     | Furfural       |

Totals : 46.23345

Fig. S65 Reaction conditions: Cellulose (162 mg), C-HCl (8 mg), [EMIM]Cl (1 g, 7 mmol), 120 °C, 8 h



```

=====
Acq. Operator   : SYSTEM                      Seq. Line : 39
Acq. Instrument : HPLC-DAD                   Location  : P1-D-05
Injection Date  : 12/26/2021 4:32:59 AM      Inj       : 1
                                           Inj Volume: 10.000 µl
Acq. Method    : D:\DATA\2021\Thang 12\25-12-Hang_Trinh_Ha\2021-12-25-HMF 2021-12-25 17-04-
                    50\HMF_cot 150_hat nho.M
Last changed   : 11/30/2021 8:55:26 PM by SYSTEM
Analysis Method: D:\METHOD\HMF_cot 150_hat nho_KQ.M
Last changed   : 12/29/2021 11:44:40 PM by SYSTEM
                    (modified after loading)
=====
  
```

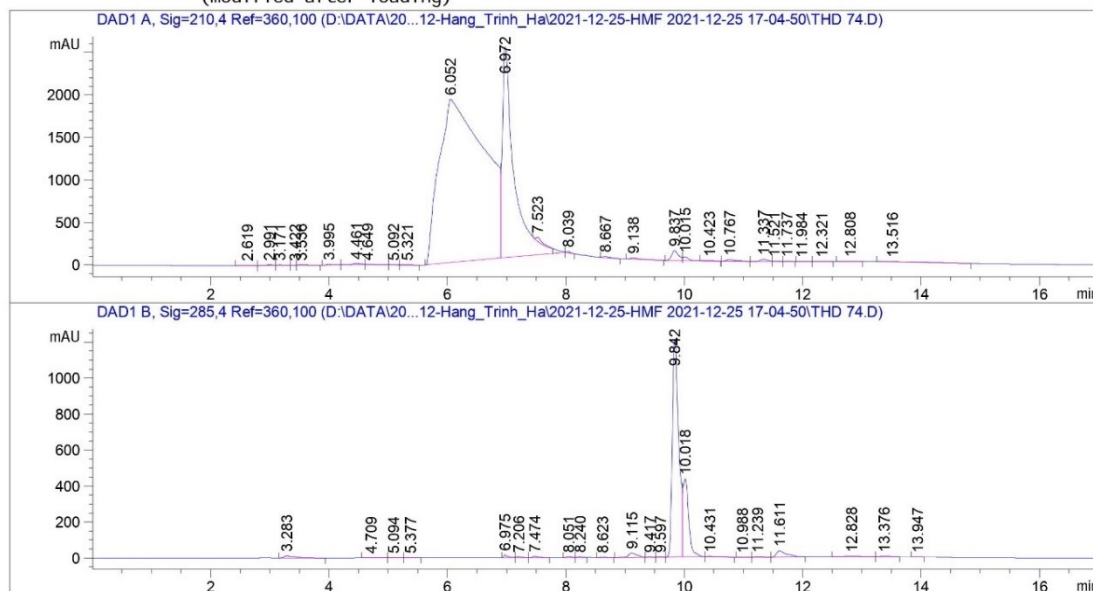

External Standard Report

```

=====
Sorted By      : Signal
Calib. Data Modified : 12/29/2021 11:54:20 PM
Multiplier    : 1.0000
Dilution      : 1.0000
Do not use Multiplier & Dilution Factor with ISTDs
  
```

Signal 1: DAD1 A, Sig=210,4 Ref=360,100

| RetTime [min] | Type | Area [mAU*s] | Amt/Area   | Amount [ppm] | Grp | Name           |
|---------------|------|--------------|------------|--------------|-----|----------------|
| 3.995         | BB   | 62.14554     | 1.36346    | 84.73278     |     | Formic acid    |
| 9.138         | BB   | 160.68103    | 3.46817    | 557.26926    |     | Levulinic acid |
| 9.837         | BV   | 942.49615    | 1.22284e-1 | 115.25217    |     | HMF            |
| 10.423        | VB E | 46.48751     | 9.80607e-3 | 4.55860e-1   |     | DFP            |
| 11.337        | BV   | 231.55440    | 1.87666e-1 | 43.45484     |     | FDCA           |
| 11.521        | VB   | 38.49753     | 8.81123e-2 | 3.39211      |     | Furfural       |

Fig. S66 Reaction conditions: Cellulose (162 mg), C-HCl (8 mg), [EMIM]Cl (1 g, 7 mmol), 120 °C, 12 h

```

=====
Acq. Operator   : SYSTEM                      Seq. Line : 26
Acq. Instrument : HPLC-DAD                    Location  : P1-C-04
Injection Date  : 12/26/2021 9:55:35 PM      Inj       : 1
                                           Inj Volume: 10.000 µl
Acq. Method    : D:\DATA\2021\Thang 12\26-12-Hang_Trinh_Ha\2021-12-26-HMF 2021-12-26 14-23-18\HMF_cot 150_hat nho.M
Last changed   : 11/30/2021 8:55:26 PM by SYSTEM
Analysis Method : D:\METHOD\HMF_cot 150_hat nho_285nmKQ.M
Last changed   : 12/29/2021 10:03:33 PM by SYSTEM
Additional Info : Peak(s) manually integrated
  
```

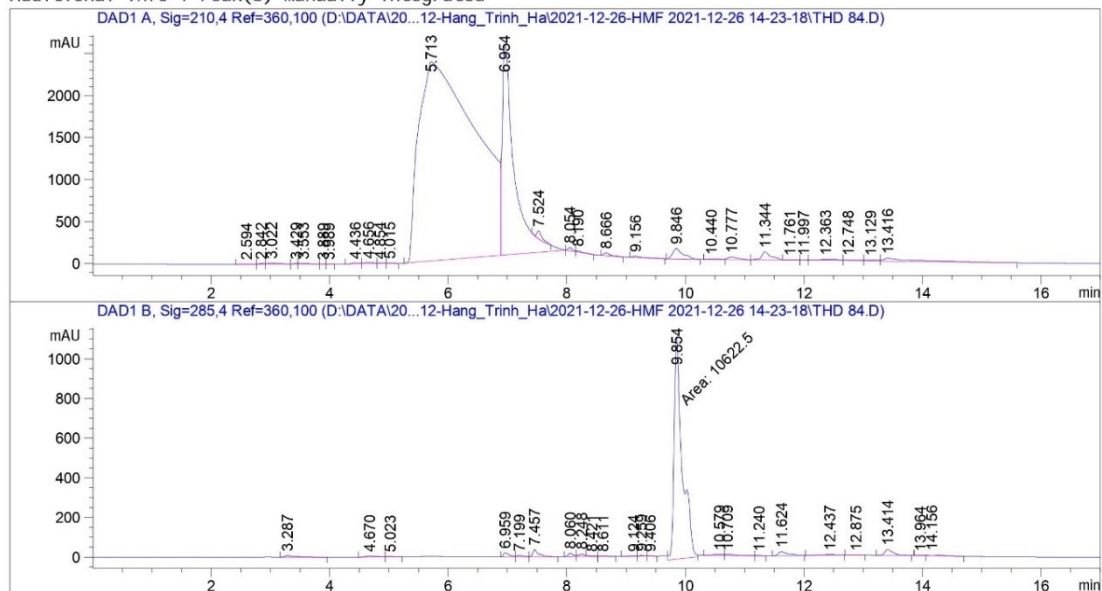

External Standard Report

```

Sorted By      : Signal
Calib. Data Modified : 12/29/2021 10:00:38 PM
Multiplier     : 1.0000
Dilution       : 1.0000
Do not use Multiplier & Dilution Factor with ISTDs
  
```

Signal 1: DAD1 A, Sig=210,4 Ref=360,100

Signal 2: DAD1 B, Sig=285,4 Ref=360,100

| RetTime [min] | Type | Area [mAU*s] | Amt/Area   | Amount [ppm] | Grp | Name           |
|---------------|------|--------------|------------|--------------|-----|----------------|
| 8.900         | -    | -            | -          | -            | -   | Levulinic acid |
| 9.854         | MM   | 1.06225e4    | 9.61189e-3 | 102.10219    |     | HMF            |
| 10.579        | BV   | 67.33325     | 1.51960e-2 | 1.02319      |     | DFF            |
| 11.240        | BB   | 3.29206      | 0.00000    | 0.00000      |     | FDCA           |

Fig. S67 Reaction conditions: Cellulose (162 mg), C-HCl (8 mg), [EMIM]Cl (1 g, 7 mmol), 120 °C, 24 h

```

=====
Acq. Operator   : SYSTEM                      Seq. Line : 46
Acq. Instrument : HPLC-DAD                    Location  : P1-E-03
Injection Date  : 12/23/2021 7:43:51 AM      Inj       : 1
                                           Inj Volume: 10.000 µl
Acq. Method     : D:\DATA\2021\Thang 12\22-12-Hang_Trinh_Ha\2021-12-22-HMF 2021-12-22 18-08-06\HMF_cot 150_hat_nho.M
Last changed    : 11/30/2021 8:55:26 PM by SYSTEM
Analysis Method : D:\METHOD\HMF_cot 150_hat_nho_285nmKQ.M
Last changed    : 12/23/2021 9:10:27 AM by SYSTEM
Additional Info  : Peak(s) manually integrated
  
```

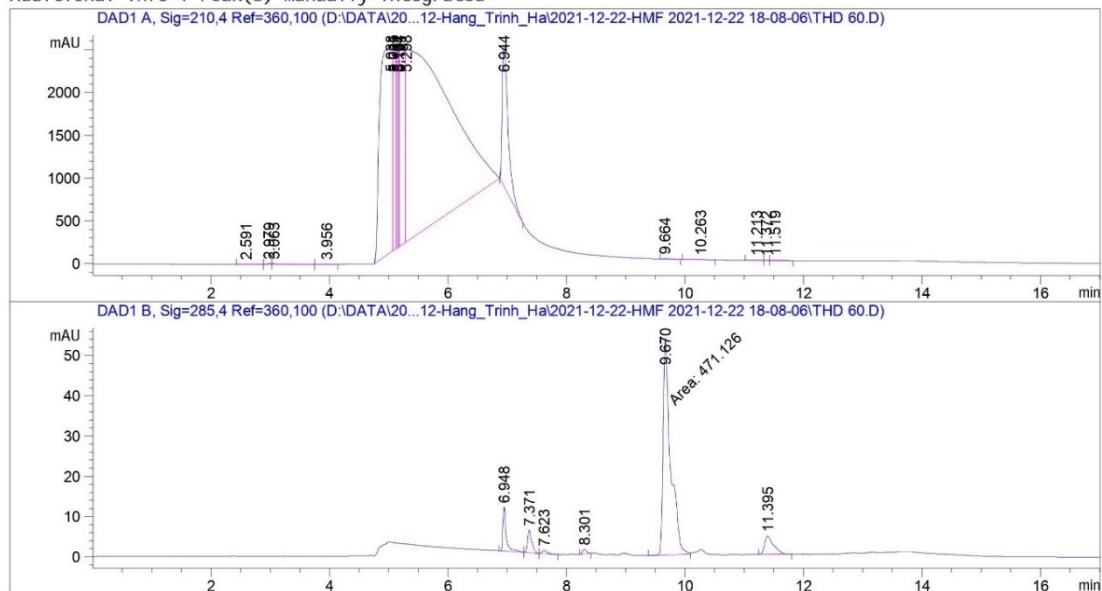

External Standard Report

```

Sorted By      : Signal
Calib. Data Modified : 12/23/2021 9:09:06 AM
Multiplier     : 1.0000
Dilution       : 1.0000
Do not use Multiplier & Dilution Factor with ISTDs
  
```

Signal 1: DAD1 A, Sig=210,4 Ref=360,100

Signal 2: DAD1 B, Sig=285,4 Ref=360,100

| RetTime [min] | Type | Area [mAU*s] | Amt/Area   | Amount [ppm] | Grp | Name           |
|---------------|------|--------------|------------|--------------|-----|----------------|
| 8.800         | -    | -            | -          | -            | -   | Levulinic acid |
| 9.670         | MM   | 471.12610    | 8.80348e-3 | 4.14755      | -   | HMF            |
| 10.401        | -    | -            | -          | -            | -   | DFF            |
| 11.097        | -    | -            | -          | -            | -   | FDCA           |

Fig. S68 Reaction conditions: Cellulose (162 mg), C-HCl (10 mg), [EMIM]Cl (1 g, 7 mmol), 120 °C, 2 h

```

=====
Acq. Operator   : SYSTEM                      Seq. Line :   30
Acq. Instrument : HPLC-DAD                   Location  : P1-C-05
Injection Date  : 12/26/2021 1:50:01 AM      Inj       :    1
                                           Inj Volume: 10.000 µl
Acq. Method    : D:\DATA\2021\Thang 12\25-12-Hang_Trinh_Ha\2021-12-25-HMF 2021-12-25 17-04-
                    50\HMF_cot 150_hat nho.M
Last changed   : 11/30/2021 8:55:26 PM by SYSTEM
Analysis Method: D:\METHOD\HMF_cot 150_hat nho_285nmKQ.M
Last changed   : 12/29/2021 10:03:33 PM by SYSTEM
Additional Info: Peak(s) manually integrated
  
```

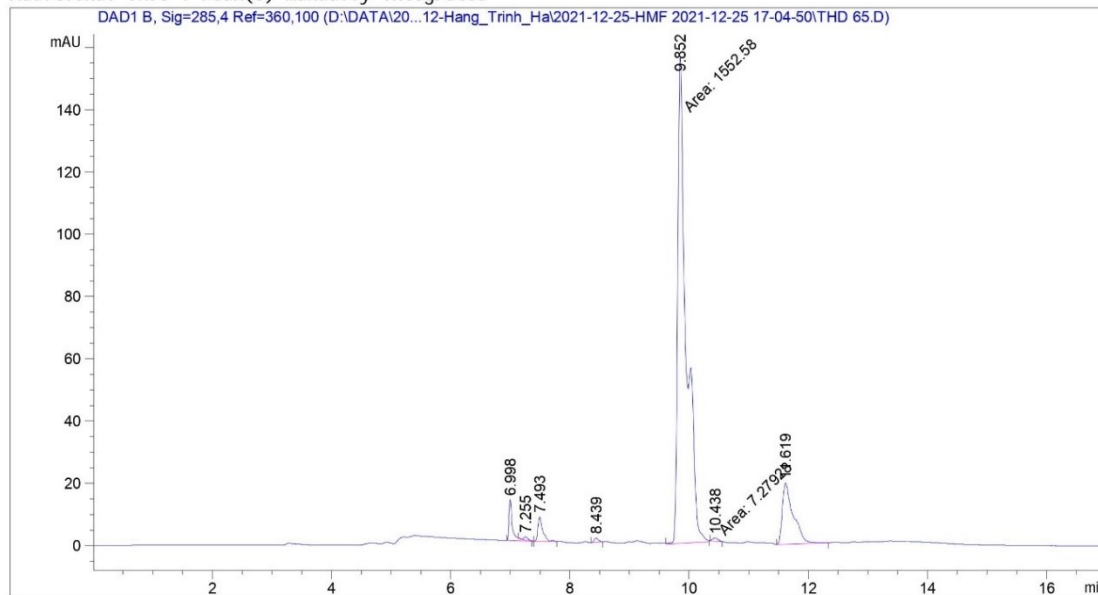

External Standard Report

```

Sorted By      : Signal
Calib. Data Modified : 12/29/2021 10:00:38 PM
Multiplier     : 1.0000
Dilution       : 1.0000
Do not use Multiplier & Dilution Factor with ISTDs
  
```

Signal 1: DAD1 B, Sig=285,4 Ref=360,100

| RetTime [min] | Type | Area [mAU*s] | Amt/Area   | Amount [ppm] | Grp | Name           |
|---------------|------|--------------|------------|--------------|-----|----------------|
| 8.900         | -    | -            | -          | -            | -   | Levulinic acid |
| 9.852         | MM   | 1552.57837   | 9.39271e-3 | 14.58293     | -   | HMF            |
| 10.438        | MM   | 7.27928      | 5.47473e-2 | 3.98521e-1   | -   | DFF            |
| 11.097        | -    | -            | -          | -            | -   | FDCA           |
| 11.619        | BB   | 250.41995    | 9.21766e-3 | 2.30829      | -   | Furfural       |

Totals : 17.28973

Fig. S69 Reaction conditions: Cellulose (162 mg), C-HCl (10 mg), [EMIM]Cl (1 g, 7 mmol), 120 °C, 4 h

```

=====
Acq. Operator   : SYSTEM                      Seq. Line   : 35
Acq. Instrument : HPLC-DAD                     Location    : P1-D-01
Injection Date  : 12/26/2021 3:20:39 AM      Inj         : 1
                                           Inj Volume  : 10.000 µl
Acq. Method    : D:\DATA\2021\Thang 12\25-12-Hang_Trinh_Ha\2021-12-25-HMF 2021-12-25 17-04-50\HMF_cot 150_hat_nho.M
Last changed   : 11/30/2021 8:55:26 PM by SYSTEM
Analysis Method : D:\METHOD\HMF_cot 150_hat_nho_285nmKQ.M
Last changed   : 12/29/2021 10:03:33 PM by SYSTEM
Additional Info : Peak(s) manually integrated
  
```

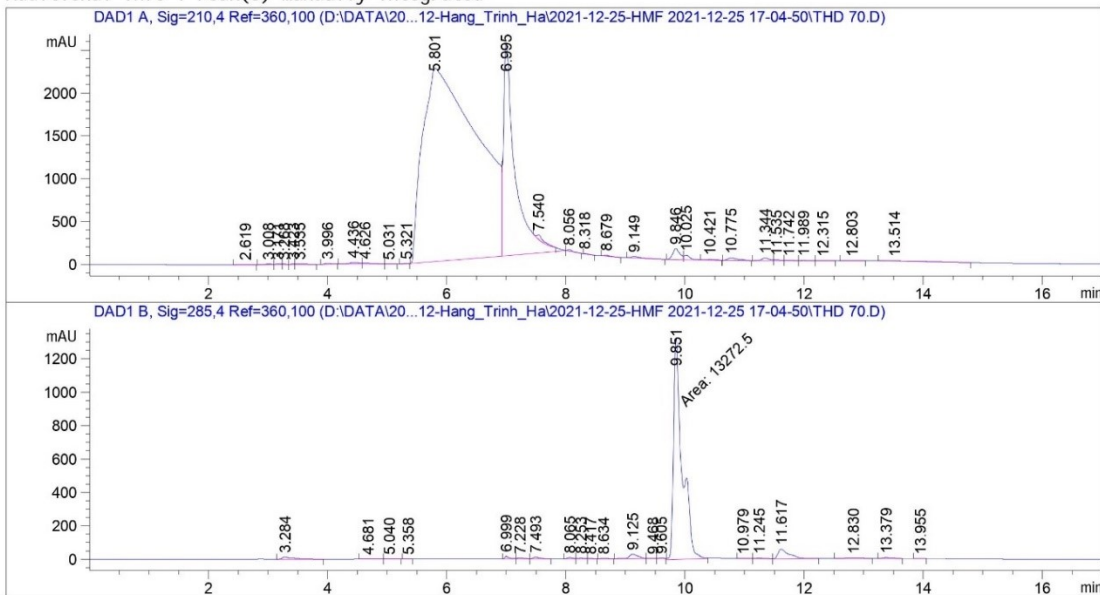

External Standard Report

```

Sorted By      : Signal
Calib. Data Modified : 12/29/2021 10:00:38 PM
Multiplier     : 1.0000
Dilution       : 1.0000
Do not use Multiplier & Dilution Factor with ISTDs
  
```

Signal 1: DAD1 A, Sig=210,4 Ref=360,100

Signal 2: DAD1 B, Sig=285,4 Ref=360,100

| RetTime [min] | Type | Area [mAU*s] | Amt./Area  | Amount [ppm] | Grp | Name           |
|---------------|------|--------------|------------|--------------|-----|----------------|
| 8.900         | -    | -            | -          | -            | -   | Levulinic acid |
| 9.851         | MM   | 1.32725e4    | 9.61938e-3 | 127.67339    | -   | HMF            |
| 10.401        | -    | -            | -          | -            | -   | DFP            |
| 10.979        | BV   | 14.55604     | 0.00000    | 0.00000      | -   | FDCA           |

Fig. S70 Reaction conditions: Cellulose (162 mg), C-HCl (10 mg), [EMIM]Cl (1 g, 7 mmol), 120 °C, 8 h



```

=====
Acq. Operator   : SYSTEM                      Seq. Line : 40
Acq. Instrument : HPLC-DAD                    Location  : P1-D-06
Injection Date  : 12/26/2021 4:51:16 AM      Inj       : 1
                                           Inj Volume: 10.000 µl
Acq. Method     : D:\DATA\2021\Thang 12\25-12-Hang_Trinh_Ha\2021-12-25-HMF 2021-12-25 17-04-50\HMF_cot 150_hat nho.M
Last changed    : 11/30/2021 8:55:26 PM by SYSTEM
Analysis Method : D:\METHOD\HMF_cot 150_hat nho_KQ.M
Last changed    : 12/30/2021 12:02:08 AM by SYSTEM
                (modified after loading)
Additional Info : Peak(s) manually integrated
  
```

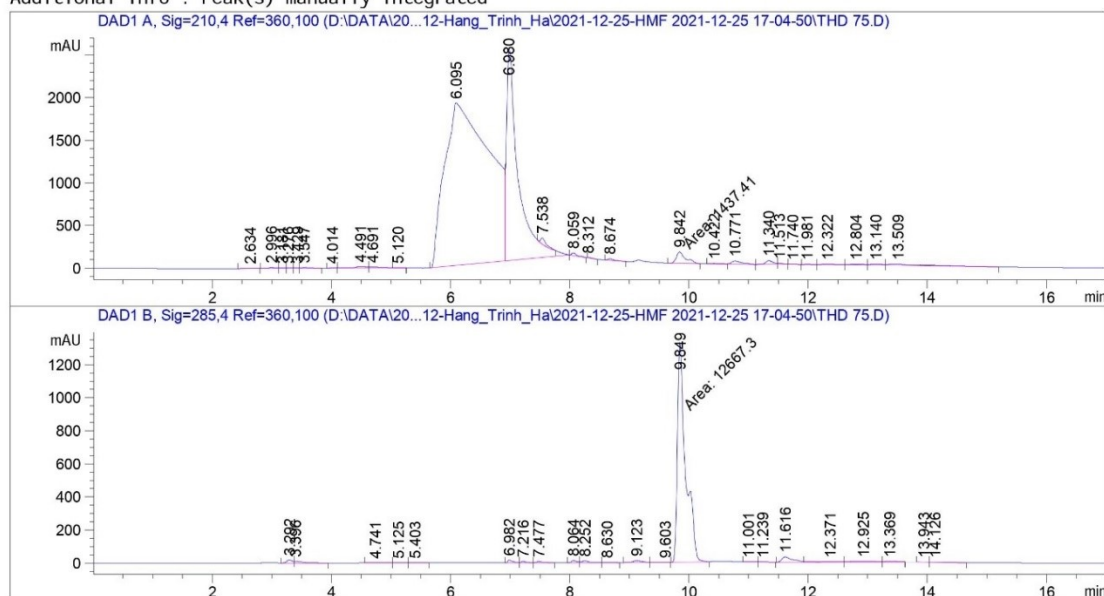

External Standard Report

```

Sorted By      : Signal
Calib. Data Modified : 12/30/2021 12:02:08 AM
Multiplier     : 1.0000
Dilution       : 1.0000
Do not use Multiplier & Dilution Factor with ISTDs
  
```

Signal 1: DAD1 A, Sig=210,4 Ref=360,100

| RetTime [min] | Type | Area [mAU*s] | Amt/Area   | Amount [ppm] | Grp | Name           |
|---------------|------|--------------|------------|--------------|-----|----------------|
| 4.014         | BB   | 14.48118     | 1.65411    | 23.95351     |     | Formic acid    |
| 9.100         |      | -            | -          | -            |     | Levulinic acid |
| 9.842         | MM   | 1437.41370   | 1.22796e-1 | 176.50887    |     | HMF            |
| 10.422        | BV E | 42.80061     | 5.33376e-3 | 2.28288e-1   |     | DFF            |
| 11.340        | BV   | 385.93423    | 1.93189e-1 | 74.55824     |     | FDCA           |
| 11.513        | VB   | 71.98994     | 9.66458e-2 | 6.95752      |     | Furfural       |

Fig. S71 Reaction conditions: Cellulose (162 mg), C-HCl (10 mg), [EMIM]Cl (1 g, 7 mmol), 120 °C, 12 h

```

=====
Acq. Operator   : SYSTEM                      Seq. Line : 45
Acq. Instrument : HPLC-DAD                    Location  : P1-E-02
Injection Date  : 12/26/2021 6:21:39 AM      Inj       : 1
                                           Inj Volume: 10.000 µl
Acq. Method     : D:\DATA\2021\Thang 12\25-12-Hang_Trinh_Ha\2021-12-25-HMF 2021-12-25 17-04-50\HMF_cot 150_hat_nho.M
Last changed    : 11/30/2021 8:55:26 PM by SYSTEM
Analysis Method : D:\METHOD\HMF_cot 150_hat_nho_285nmKQ.M
Last changed    : 12/30/2021 3:25:52 AM by SYSTEM
                  (modified after loading)
Additional Info  : Peak(s) manually integrated
  
```

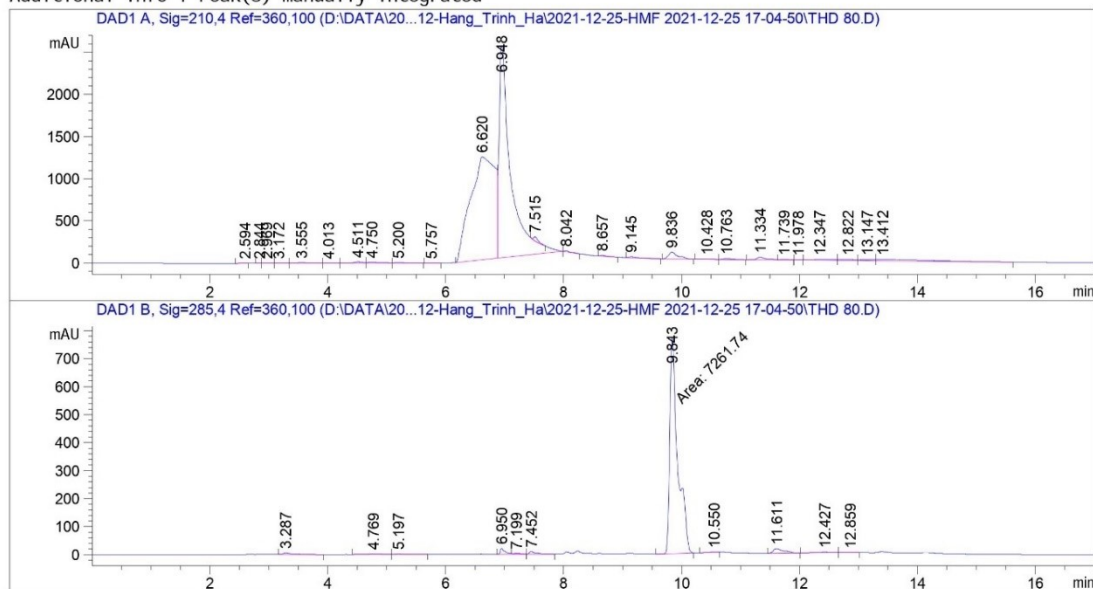

External Standard Report

```

Sorted By      : Signal
Calib. Data Modified : 12/30/2021 3:26:25 AM
Multiplier     : 1.0000
Dilution       : 1.0000
Do not use Multiplier & Dilution Factor with ISTDs
  
```

Signal 1: DAD1 A, Sig=210,4 Ref=360,100

Signal 2: DAD1 B, Sig=285,4 Ref=360,100

| RetTime [min] | Type | Area [mAU*s] | Amt/Area   | Amount [ppm] | Grp | Name           |
|---------------|------|--------------|------------|--------------|-----|----------------|
| 8.900         |      | -            | -          | -            |     | Levulinic acid |
| 9.843         | MM   | 7261.73975   | 9.59453e-3 | 69.67296     |     | HMF            |
| 10.550        | BB   | 12.91121     | 3.54036e-2 | 4.57103e-1   |     | DFF            |

Fig. S72 Reaction conditions: Cellulose (162 mg), C-HCl (10 mg), [EMIM]Cl (1 g, 7 mmol), 120 °C, 18 h

```

=====
Acq. Operator   : SYSTEM                      Seq. Line : 27
Acq. Instrument : HPLC-DAD                   Location  : P1-C-05
Injection Date  : 12/26/2021 10:13:40 PM    Inj       : 1
                                           Inj Volume: 10.000 µl
Acq. Method    : D:\DATA\2021\Thang 12\26-12-Hang_Trinh_Ha\2021-12-26-HMF 2021-12-26 14-23-18\HMF_cot 150_hat_nho.M
Last changed   : 11/30/2021 8:55:26 PM by SYSTEM
Analysis Method: D:\METHOD\HMF_cot 150_hat_nho_285nmKQ.M
Last changed   : 12/29/2021 10:03:33 PM by SYSTEM
Additional Info : Peak(s) manually integrated
  
```

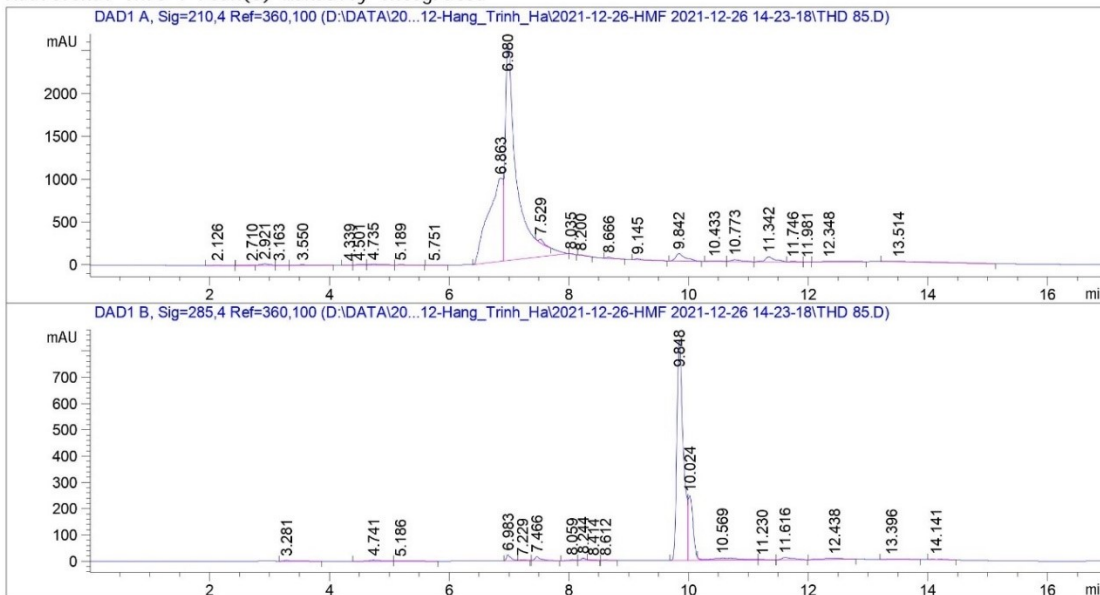

External Standard Report

```

Sorted By       : Signal
Calib. Data Modified : 12/29/2021 10:00:38 PM
Multiplier     : 1.0000
Dilution       : 1.0000
Do not use Multiplier & Dilution Factor with ISTDs
  
```

Signal 1: DAD1 A, Sig=210,4 Ref=360,100

Signal 2: DAD1 B, Sig=285,4 Ref=360,100

| RetTime [min] | Type | Area [mAU*s] | Amt/Area   | Amount [ppm] | Grp | Name           |
|---------------|------|--------------|------------|--------------|-----|----------------|
| 8.900         | -    | -            | -          | -            | -   | Levulinic acid |
| 9.848         | BV   | 6305.29443   | 9.58620e-3 | 60.44383     |     | HMF            |
| 10.569        | VV E | 247.70139    | 1.17051e-2 | 2.89936      |     | DFF            |
| 11.230        | VB E | 11.51327     | 0.00000    | 0.00000      |     | FDCA           |

Fig. S73 Reaction conditions: Cellulose (162 mg), C-HCl (10 mg), [EMIM]Cl (1 g, 7 mmol), 120 °C, 24 h

```

=====
Acq. Operator   : SYSTEM                      Seq. Line :   31
Acq. Instrument : HPLC-DAD                   Location  : P1-C-06
Injection Date  : 12/26/2021 2:08:06 AM      Inj       :    1
                                           Inj Volume: 10.000 µl
Acq. Method     : D:\DATA\2021\Thang 12\25-12-Hang_Trinh_Ha\2021-12-25-HMF 2021-12-25 17-04-
                    50\HMF_cot 150_hat nho.M
Last changed    : 11/30/2021 8:55:26 PM by SYSTEM
Analysis Method : D:\METHOD\HMF_cot 150_hat nho_KQ.M
Last changed    : 12/29/2021 10:45:12 PM by SYSTEM
                    (modified after loading)
Additional Info : Peak(s) manually integrated
  
```

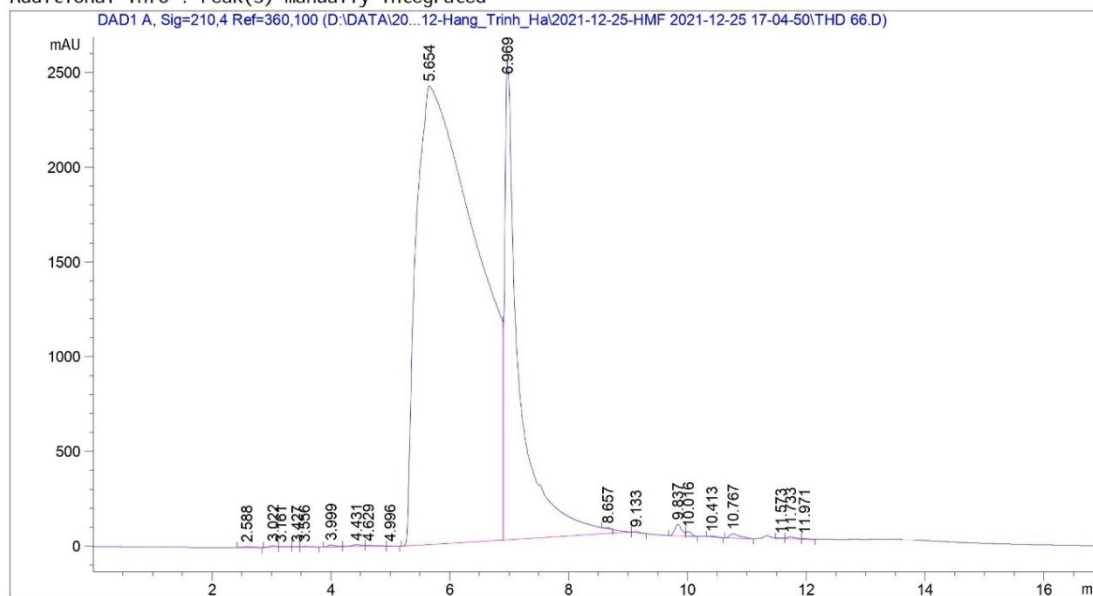

External Standard Report

```

Sorted By      : Signal
Calib. Data Modified : 12/29/2021 10:44:42 PM
Multiplier     : 1.0000
Dilution       : 1.0000
Do not use Multiplier & Dilution Factor with ISTDs
  
```

Signal 1: DAD1 A, Sig=210,4 Ref=360,100

| RetTime [min] | Type | Area [mAU*s] | Amt/Area   | Amount [ppm] | Grp | Name           |
|---------------|------|--------------|------------|--------------|-----|----------------|
| 3.999         | BV   | 91.19791     | 1.33533    | 121.77894    |     | Formic acid    |
| 8.900         |      | -            | -          | -            |     | Levulinic acid |
| 9.837         | BV   | 499.71005    | 1.20966e-1 | 60.44786     |     | HMF            |
| 10.413        | BB   | 32.55491     | 0.00000    | 0.00000      |     | DFP            |
| 11.400        |      | -            | -          | -            |     | FDCA           |
| 11.573        | VV   | 51.27386     | 9.26828e-2 | 4.75221      |     | Furfural       |

Fig. S74 Reaction conditions: Cellulose (162 mg), C-HCl (20 mg), [EMIM]Cl (1 g, 7 mmol), 120 °C, 4 h

```

=====
Acq. Operator   : SYSTEM                      Seq. Line : 46
Acq. Instrument : HPLC-DAD                   Location  : P1-E-03
Injection Date  : 12/26/2021 6:39:42 AM      Inj       : 1
                                           Inj Volume: 10.000 µl
Acq. Method     : D:\DATA\2021\Thang 12\25-12-Hang_Trinh_Ha\2021-12-25-HMF 2021-12-25 17-04-50\HMF_cot 150_hat_nho.M
Last changed    : 11/30/2021 8:55:26 PM by SYSTEM
Analysis Method : D:\METHOD\HMF_cot 150_hat_nho_285nmKQ.M
Last changed    : 12/29/2021 10:03:33 PM by SYSTEM
Additional Info  : Peak(s) manually integrated
  
```

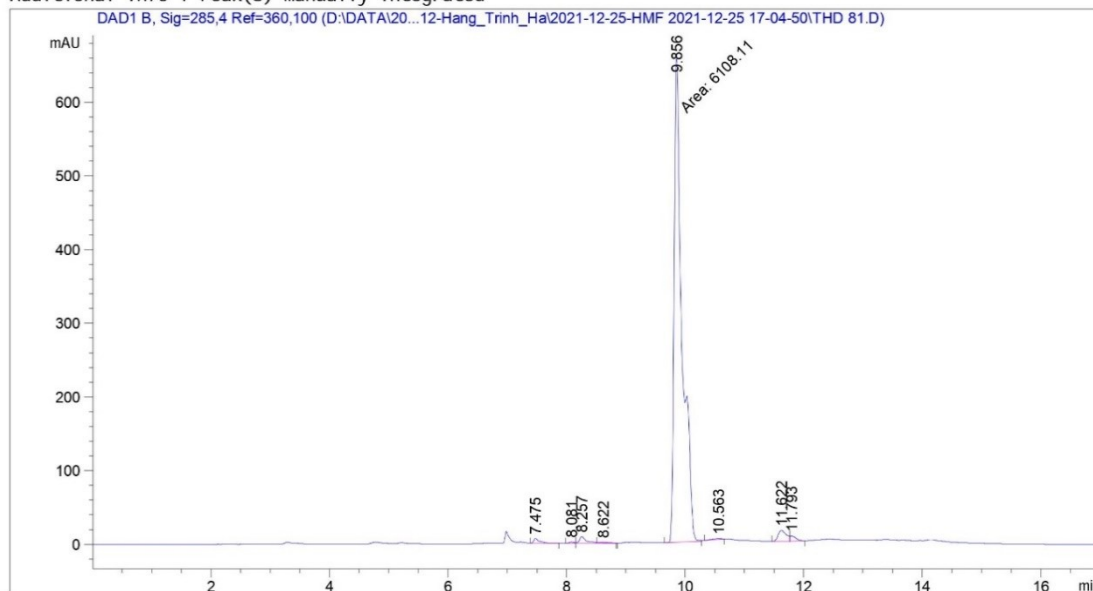

External Standard Report

```

=====
Sorted By      : Signal
Calib. Data Modified : 12/29/2021 10:00:38 PM
Multiplier     : 1.0000
Dilution       : 1.0000
Do not use Multiplier & Dilution Factor with ISTDs
  
```

Signal 1: DAD1 B, Sig=285,4 Ref=360,100

| RetTime [min] | Type | Area [mAU*s] | Amt/Area   | Amount [ppm] | Grp | Name           |
|---------------|------|--------------|------------|--------------|-----|----------------|
| 8.900         |      | -            | -          | -            |     | Levulinic acid |
| 9.856         | MM   | 6108.10693   | 9.58416e-3 | 58.54108     |     | HMF            |
| 10.563        | BB   | 11.91111     | 3.75028e-2 | 4.46700e-1   |     | DFF            |
| 11.097        |      | -            | -          | -            |     | FDCA           |
| 11.622        | BV   | 141.66512    | 8.45163e-3 | 1.19730      |     | Furfural       |

Totals : 60.18509

Fig. S75 Reaction conditions: Cellulose (162 mg), C-HCl (20 mg), [EMIM]Cl (1 g, 7 mmol), 120 °C, 12 h



```

=====
Acq. Operator   : SYSTEM                      Seq. Line : 41
Acq. Instrument : HPLC-DAD                   Location  : P1-D-07
Injection Date  : 12/26/2021 5:09:20 AM      Inj       : 1
                                           Inj Volume: 10.000 µl
Acq. Method    : D:\DATA\2021\Thang 12\25-12-Hang_Trinh_Ha\2021-12-25-HMF 2021-12-25 17-04-50\HMF_cot 150_hat_nho.M
Last changed   : 11/30/2021 8:55:26 PM by SYSTEM
Analysis Method: D:\METHOD\HMF_cot 150_hat_nho_KQ.M
Last changed   : 12/30/2021 12:02:08 AM by SYSTEM
                (modified after loading)
Additional Info : Peak(s) manually integrated
  
```

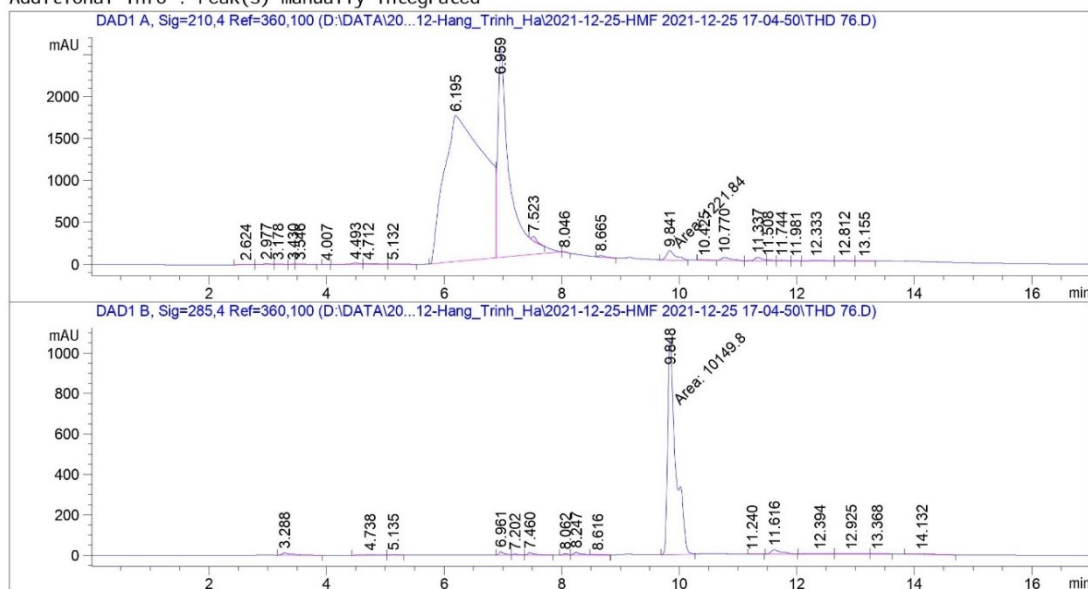

External Standard Report

```

Sorted By      : Signal
Calib. Data Modified : 12/30/2021 12:02:52 AM
Multiplier     : 1.0000
Dilution      : 1.0000
Do not use Multiplier & Dilution Factor with ISTDs
  
```

Signal 1: DAD1 A, Sig=210,4 Ref=360,100

| RetTime [min] | Type | Area [mAU*s] | Amt/Area   | Amount [ppm] | Grp | Name           |
|---------------|------|--------------|------------|--------------|-----|----------------|
| 4.007         | BB   | 4.01500      | 2.64198    | 10.60755     |     | Formic acid    |
| 9.100         |      | -            | -          | -            |     | Levulinic acid |
| 9.841         | MM   | 1221.83801   | 1.22624e-1 | 149.82674    |     | HMF            |
| 10.425        | BV E | 36.67812     | 0.00000    | 0.00000      |     | DFF            |
| 11.337        | BV   | 369.08209    | 1.92811e-1 | 71.16299     |     | FDCA           |
| 11.508        | VV   | 69.26036     | 9.62592e-2 | 6.66695      |     | Furfural       |

Fig. S76 Reaction conditions: Cellulose (162 mg), C-HCl (20 mg), [EMIM]Cl (1 g, 7 mmol), 120 °C, 18 h

```

=====
Acq. Operator   : SYSTEM                      Seq. Line : 28
Acq. Instrument : HPLC-DAD                   Location  : P1-C-06
Injection Date  : 12/26/2021 10:31:43 PM     Inj       : 1
                                           Inj Volume: 10.000 µl
Acq. Method    : D:\DATA\2021\Thang 12\26-12-Hang_Trinh_Ha\2021-12-26-HMF 2021-12-26 14-23-18\HMF_cot 150_hat_nho.M
Last changed   : 11/30/2021 8:55:26 PM by SYSTEM
Analysis Method: D:\METHOD\HMF_cot 150_hat_nho_285nmKQ.M
Last changed   : 12/29/2021 10:03:33 PM by SYSTEM
Additional Info: Peak(s) manually integrated
  
```

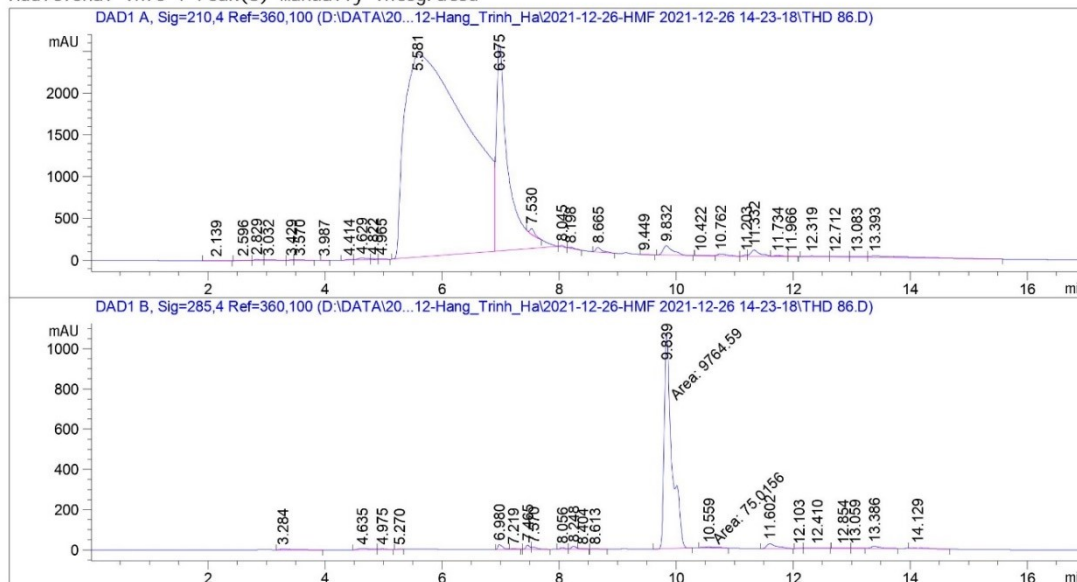

External Standard Report

```

Sorted By      : Signal
Calib. Data Modified : 12/29/2021 10:00:38 PM
Multiplier     : 1.0000
Dilution      : 1.0000
Do not use Multiplier & Dilution Factor with ISTDs
  
```

Signal 1: DAD1 A, Sig=210,4 Ref=360,100

Signal 2: DAD1 B, Sig=285,4 Ref=360,100

| RetTime [min] | Type | Area [mAU*s] | Amt/Area   | Amount [ppm] | Grp | Name           |
|---------------|------|--------------|------------|--------------|-----|----------------|
| 8.900         | -    | -            | -          | -            | -   | Levulinic acid |
| 9.839         | MM   | 9764.59180   | 9.60859e-3 | 93.82400     | -   | HMF            |
| 10.559        | MM   | 75.01559     | 1.47050e-2 | 1.10310      | -   | DFF            |
| 11.097        | -    | -            | -          | -            | -   | FDCA           |

Fig. S77 Reaction conditions: Cellulose (162 mg), C-HCl (20 mg), [EMIM]Cl (1 g, 7 mmol), 120 °C, 24 h

```

=====
Acq. Operator   : SYSTEM                      Seq. Line : 43
Acq. Instrument : HPLC-DAD                    Location  : P1-D-08
Injection Date  : 12/20/2021 4:35:58 AM      Inj       : 1
                                           Inj Volume: 10.000 µl
Different Inj Volume from Sample Entry! Actual Inj Volume : 5.000 µl
Acq. Method     : D:\DATA\2021\Thang 12\19-12-Hang_Trinh_Ha\2021-12-19-HMF 2021-12-19 15-53-33\HMF_cot 150_hat_nho.M
Last changed    : 11/30/2021 8:55:26 PM by SYSTEM
Analysis Method : D:\METHOD\HMF_cot 150_hat_nho_285nmKQ.M
Last changed    : 12/29/2021 10:03:33 PM by SYSTEM
=====
  
```

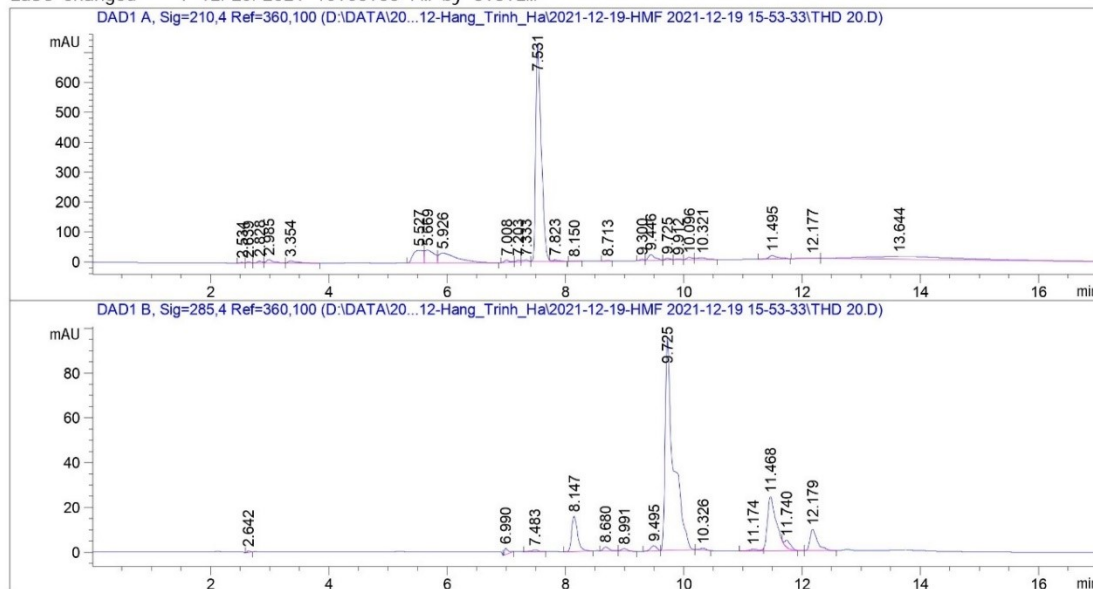

External Standard Report

```

Sorted By      : Signal
Calib. Data Modified : 12/29/2021 10:00:38 PM
Multiplier     : 1.0000
Dilution       : 1.0000
Do not use Multiplier & Dilution Factor with ISTDs
  
```

Signal 1: DAD1 A, Sig=210,4 Ref=360,100

Signal 2: DAD1 B, Sig=285,4 Ref=360,100

| RetTime [min] | Type | Area [mAU*s] | Amt/Area   | Amount [ppm] | Grp | Name           |
|---------------|------|--------------|------------|--------------|-----|----------------|
| 8.991         | VB   | 8.16062      | 20.20872   | 164.91576    |     | Levulinic acid |
| 9.725         | VB   | 940.83545    | 9.22581e-3 | 8.67997      |     | HMF            |
| 10.326        | BB   | 5.83982      | 6.56780e-2 | 3.83548e-1   |     | DFF            |
| 11.174        | BV E | 8.00892      | 0.00000    | 0.00000      |     | FDCA           |

Fig. S78 Reaction conditions: Cellulose (162 mg), C-H<sub>2</sub>SO<sub>4</sub> (10 mg), DES-C (4 g), 120 °C, 18 h

```

=====
Acq. Operator   : SYSTEM                      Seq. Line :   44
Acq. Instrument : HPLC-DAD                   Location  : P1-D-09
Injection Date  : 12/20/2021 4:54:00 AM      Inj       :    1
                                           Inj Volume: 10.000 µl
Different Inj Volume from Sample Entry! Actual Inj Volume : 5.000 µl
Acq. Method    : D:\DATA\2021\Thang 12\19-12-Hang_Trinh_Ha\2021-12-19-HMF 2021-12-19 15-53-33\HMF_cot 150_hat_nho.M
Last changed   : 11/30/2021 8:55:26 PM by SYSTEM
Analysis Method: D:\METHOD\HMF_cot 150_hat_nho_285nmKQ.M
Last changed   : 12/29/2021 10:03:33 PM by SYSTEM
Additional Info : Peak(s) manually integrated
  
```

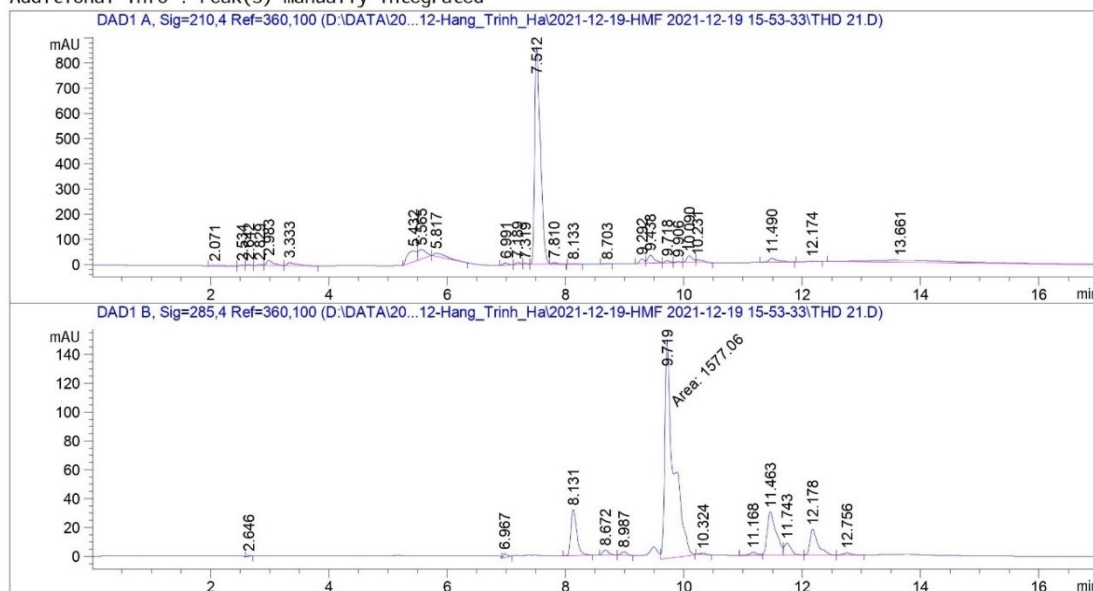

External Standard Report

```

Sorted By      : Signal
Calib. Data Modified : 12/29/2021 10:00:38 PM
Multiplier     : 1.0000
Dilution      : 1.0000
Do not use Multiplier & Dilution Factor with ISTDs
  
```

Signal 1: DAD1 A, Sig=210,4 Ref=360,100

Signal 2: DAD1 B, Sig=285,4 Ref=360,100

| RetTime [min] | Type | Area [mAU*s] | Amt/Area   | Amount [ppm] | Grp | Name           |
|---------------|------|--------------|------------|--------------|-----|----------------|
| 8.987         | VB   | 16.27456     | 19.48703   | 317.14291    |     | Levulinic acid |
| 9.719         | MM   | 1577.06274   | 9.39670e-3 | 14.81919     |     | HMF            |
| 10.324        | BB   | 5.96676      | 6.45020e-2 | 3.84868e-1   |     | DFF            |

Fig. S79 Reaction conditions: Cellulose (162 mg), C-H<sub>2</sub>SO<sub>4</sub> (10 mg), DES-O (4 g), 120 °C, 18 h

```

=====
Acq. Operator   : SYSTEM                      Seq. Line : 45
Acq. Instrument : HPLC-DAD                    Location  : P1-E-01
Injection Date  : 12/20/2021 5:12:16 AM      Inj       : 1
                                           Inj Volume: 10.000 µl
Acq. Method     : D:\DATA\2021\Thang 12\19-12-Hang_Trinh_Ha\2021-12-19-HMF 2021-12-19 15-53-33\HMF_cot 150_hat_nho.M
Last changed    : 11/30/2021 8:55:26 PM by SYSTEM
Analysis Method : D:\METHOD\HMF_cot 150_hat_nho_285nmKQ.M
Last changed    : 12/29/2021 10:03:33 PM by SYSTEM
Additional Info : Peak(s) manually integrated
  
```

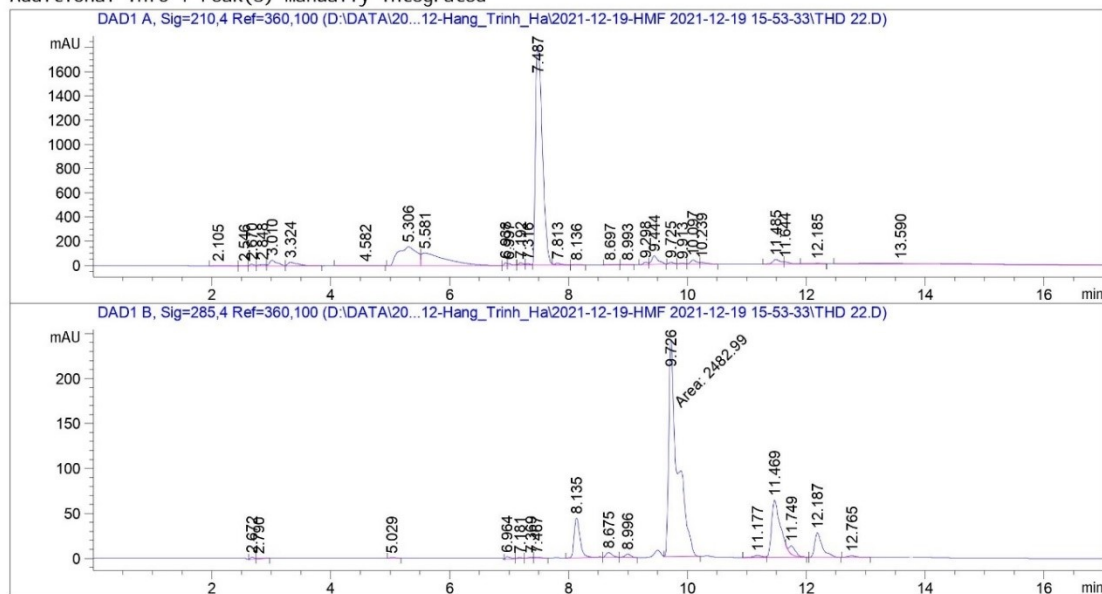

External Standard Report

```

Sorted By      : Signal
Calib. Data Modified : 12/29/2021 10:00:38 PM
Multiplier     : 1.0000
Dilution      : 1.0000
Do not use Multiplier & Dilution Factor with ISTDs
  
```

Signal 1: DAD1 A, Sig=210,4 Ref=360,100

Signal 2: DAD1 B, Sig=285,4 Ref=360,100

| RetTime [min] | Type | Area [mAU*s] | Amt/Area   | Amount [ppm] | Grp | Name           |
|---------------|------|--------------|------------|--------------|-----|----------------|
| 8.996         | BB   | 22.91698     | 19.27665   | 441.76272    |     | Levulinic acid |
| 9.726         | MM   | 2482.99048   | 9.48890e-3 | 23.56085     |     | HMF            |
| 10.401        |      | -            | -          | -            |     | DFF            |
| 11.177        | BV E | 21.16860     | 0.00000    | 0.00000      |     | FDCA           |

Fig. S80 Reaction conditions: Cellulose (162 mg), C-H<sub>2</sub>SO<sub>4</sub> (10 mg), DES-M (4 g), 120 °C, 18 h



```

=====
Acq. Operator   : SYSTEM                      Seq. Line : 46
Acq. Instrument : HPLC-DAD                    Location  : P1-E-02
Injection Date  : 12/20/2021 5:30:20 AM      Inj       : 1
                                           Inj Volume: 10.000 µl
Acq. Method     : D:\DATA\2021\Thang 12\19-12-Hang_Trinh_Ha\2021-12-19-HMF 2021-12-19 15-53-33\HMF_cot 150_hat nho.M
Last changed    : 11/30/2021 8:55:26 PM by SYSTEM
Analysis Method : D:\METHOD\HMF_cot 150_hat nho_285nmKQ.M
Last changed    : 12/29/2021 10:03:33 PM by SYSTEM
Additional Info  : Peak(s) manually integrated
  
```

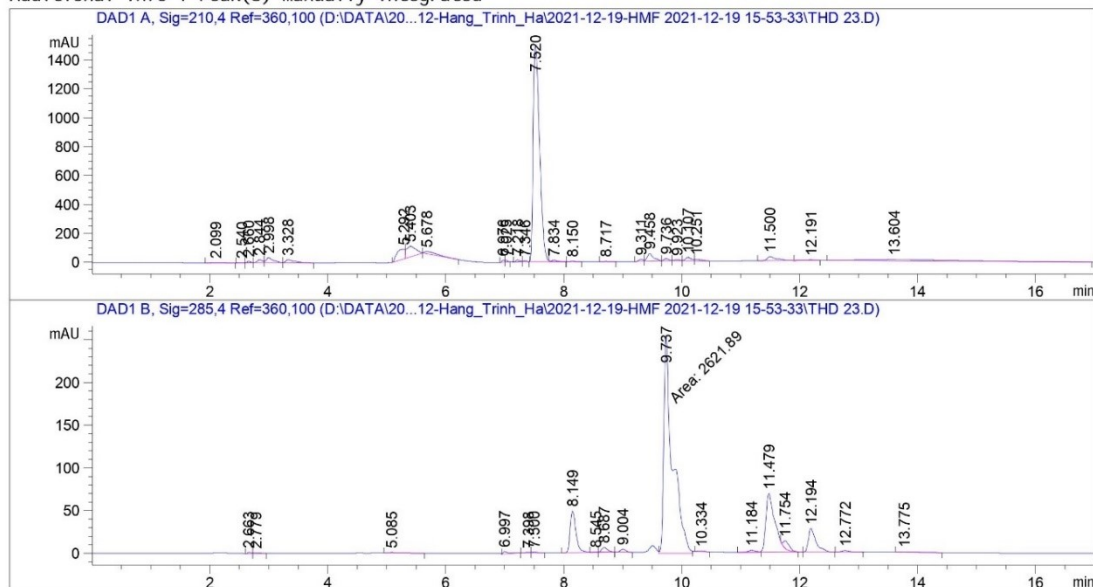

External Standard Report

```

Sorted By      : Signal
Calib. Data Modified : 12/29/2021 10:00:38 PM
Multiplier     : 1.0000
Dilution       : 1.0000
Do not use Multiplier & Dilution Factor with ISTDs
  
```

Signal 1: DAD1 A, Sig=210,4 Ref=360,100

Signal 2: DAD1 B, Sig=285,4 Ref=360,100

| RetTime [min] | Type | Area [mAU*s] | Amt/Area   | Amount [ppm] | Grp | Name           |
|---------------|------|--------------|------------|--------------|-----|----------------|
| 9.004         | BB   | 21.34094     | 19.31472   | 412.19428    |     | Levulinic acid |
| 9.737         | MM   | 2621.89331   | 9.49741e-3 | 24.90118     |     | HMF            |
| 10.334        | BB   | 5.83191      | 6.57530e-2 | 3.83465e-1   |     | DFF            |
| 11.184        | BV E | 20.75304     | 0.00000    | 0.00000      |     | FDCA           |

Fig. S81 Reaction conditions: Cellulose (162 mg), C-H<sub>2</sub>SO<sub>4</sub> (10 mg), DES-F (4 g), 120 °C, 18 h

```

=====
Acq. Operator   : SYSTEM                      Seq. Line : 46
Acq. Instrument : HPLC-DAD                   Location  : P1-E-02
Injection Date  : 12/20/2021 5:30:20 AM      Inj       : 1
                                           Inj Volume: 10.000 µl
Acq. Method    : D:\DATA\2021\Thang 12\19-12-Hang_Trinh_Ha\2021-12-19-HMF 2021-12-19 15-53-33\HMF_cot 150_hat_nho.M
Last changed   : 11/30/2021 8:55:26 PM by SYSTEM
Analysis Method: D:\METHOD\HMF_cot 150_hat_nho_285nmKQ.M
Last changed   : 12/29/2021 10:03:33 PM by SYSTEM
Additional Info: Peak(s) manually integrated
  
```

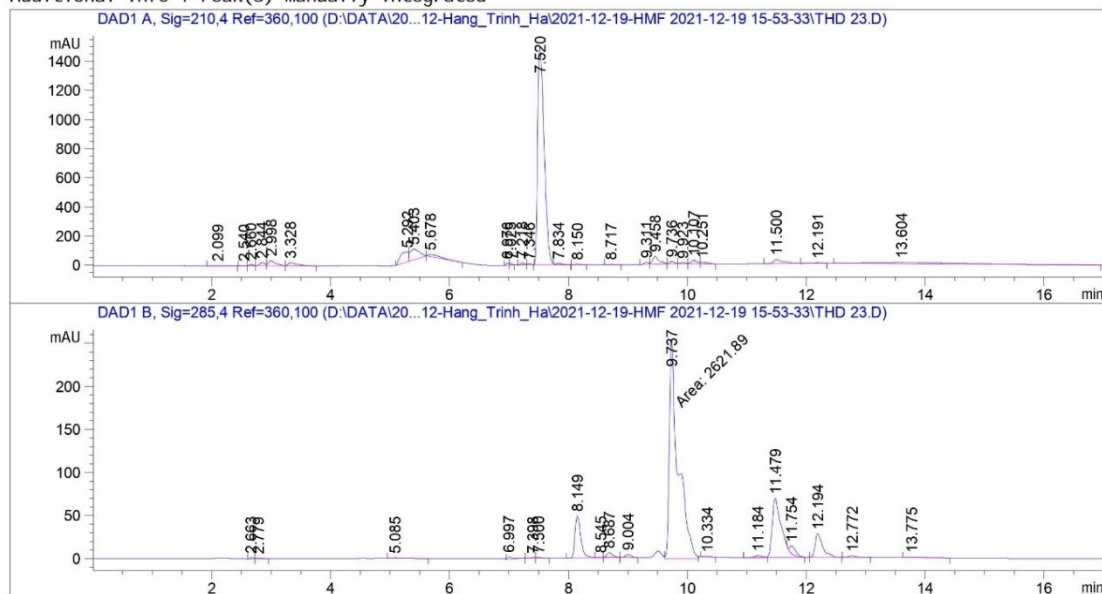

External Standard Report

```

Sorted By      : Signal
Calib. Data Modified : 12/29/2021 10:00:38 PM
Multiplier     : 1.0000
Dilution      : 1.0000
Do not use Multiplier & Dilution Factor with ISTDs
  
```

Signal 1: DAD1 A, Sig=210,4 Ref=360,100

Signal 2: DAD1 B, Sig=285,4 Ref=360,100

| RetTime [min] | Type | Area [mAU*s] | Amt/Area   | Amount [ppm] | Grp | Name           |
|---------------|------|--------------|------------|--------------|-----|----------------|
| 9.004         | BB   | 21.34094     | 19.31472   | 412.19428    |     | Levulinic acid |
| 9.737         | MM   | 2621.89331   | 9.49741e-3 | 24.90118     |     | HMF            |
| 10.334        | BB   | 5.83191      | 6.57530e-2 | 3.83465e-1   |     | DFF            |
| 11.184        | BV E | 20.75304     | 0.00000    | 0.00000      |     | FDCA           |

Fig. S82 Reaction conditions: Cellulose (162 mg), C-H<sub>2</sub>SO<sub>4</sub> (10 mg), DES-A (4 g), 120 °C, 18 h

```

=====
Acq. Operator   : SYSTEM                      Seq. Line : 27
Acq. Instrument : HPLC-DAD                    Location  : P1-C-04
Injection Date  : 1/26/2022 9:37:07 PM       Inj       : 1
                                                    Inj Volume: 10.000 µl
Acq. Method     : D:\DATA\2022\Thang 1\26-01-HMF\2022-26-01-HMF 2022-01-26 13-47-20\HMF_cot
                                                    150_hat.nho.M
Last changed    : 11/30/2021 8:55:26 PM by SYSTEM
Analysis Method : D:\METHOD\HMF_cot_150_hat.nho_285nm.KQ.M
Last changed    : 12/29/2021 10:03:33 PM by SYSTEM
Additional Info : Peak(s) manually integrated
  
```

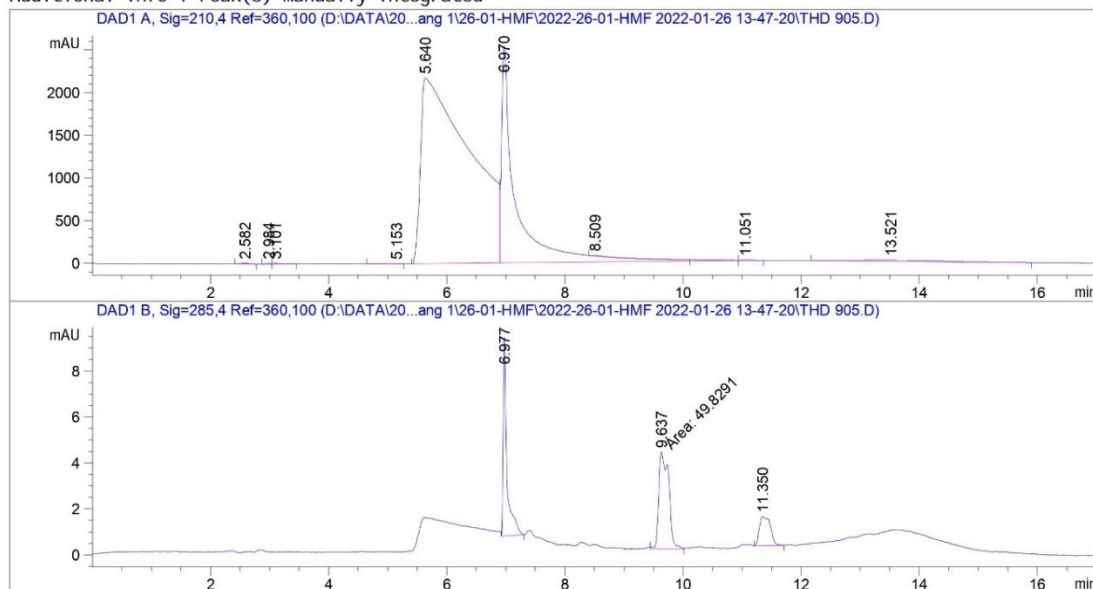

External Standard Report

```

Sorted By      : Signal
Calib. Data Modified : 12/29/2021 10:00:38 PM
Multiplier     : 1.0000
Dilution       : 1.0000
Do not use Multiplier & Dilution Factor with ISTDs
  
```

Signal 1: DAD1 A, Sig=210,4 Ref=360,100

Signal 2: DAD1 B, Sig=285,4 Ref=360,100

| RetTime [min] | Type | Area [mAU*s] | Amt/Area   | Amount [ppm] | Grp | Name           |
|---------------|------|--------------|------------|--------------|-----|----------------|
| 8.900         | -    | -            | -          | -            | -   | Levulinic acid |
| 9.637         | MM   | 49.82907     | 1.65129e-3 | 8.22823e-2   | -   | HMF            |
| 10.401        | -    | -            | -          | -            | -   | DFF            |
| 11.097        | -    | -            | -          | -            | -   | FDCA           |

Fig. S83 Reaction conditions: Cellulose (162 mg), C-H<sub>2</sub>SO<sub>4</sub> (10 mg), [EMIM]Cl (1 g, 7 mmol), 80 °C, 24 h

```

=====
Acq. Operator   : SYSTEM                      Seq. Line : 32
Acq. Instrument : HPLC-DAD                    Location  : P1-D-01
Injection Date  : 1/2/2022 7:57:42 PM         Inj       : 1
                                                Inj Volume: 10.000 µl
Acq. Method    : D:\DATA\2022\Thang 1\02-01-Hang_Trinh_Ha\2021-12-31-HMF 2022-01-02 10-35-56
                                                \HMF_cot 150_hat nho.M
Last changed   : 11/30/2021 8:55:26 PM by SYSTEM
Analysis Method: D:\METHOD\HMF_cot 150_hat nho_285nmKQ.M
Last changed   : 12/29/2021 10:03:33 PM by SYSTEM
Additional Info: Peak(s) manually integrated
  
```

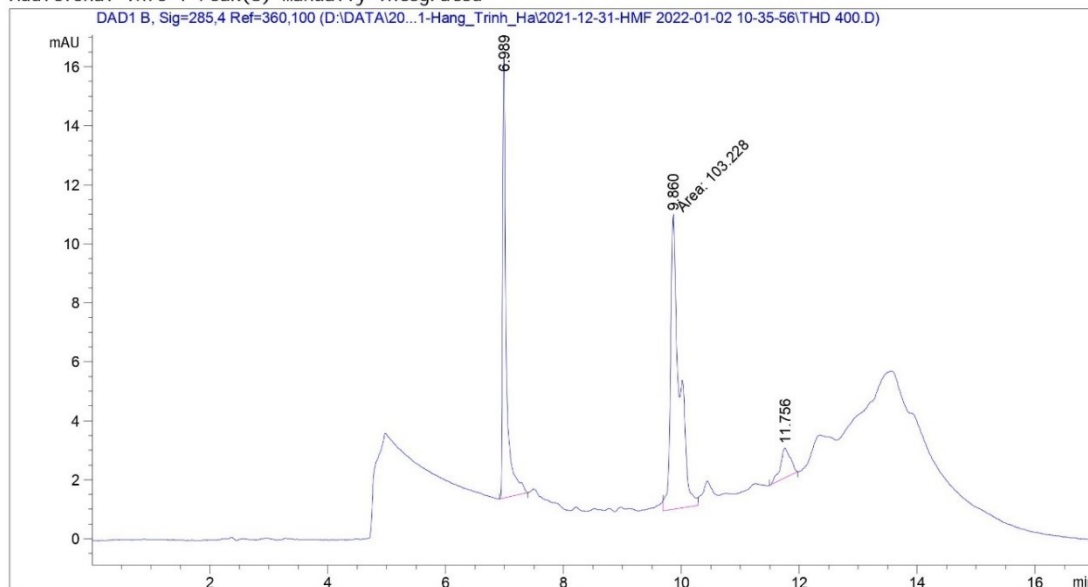

External Standard Report

```

Sorted By      : Signal
Calib. Data Modified : 12/29/2021 10:00:38 PM
Multiplier     : 1.0000
Dilution       : 1.0000
Do not use Multiplier & Dilution Factor with ISTDs
  
```

Signal 1: DAD1 B, Sig=285,4 Ref=360,100

| RetTime [min] | Type | Area [mAU*s] | Amt/Area   | Amount [ppm] | Grp | Name           |
|---------------|------|--------------|------------|--------------|-----|----------------|
| 8.900         | -    | -            | -          | -            | -   | Levulinic acid |
| 9.860         | MM   | 103.22765    | 5.78863e-3 | 5.97547e-1   | -   | HMF            |
| 10.401        | -    | -            | -          | -            | -   | DFF            |
| 11.097        | -    | -            | -          | -            | -   | FDCA           |
| 11.400        | -    | -            | -          | -            | -   | Furfural       |

Totals : 5.97547e-1

Fig. S84 Reaction conditions: Cellulose (162 mg), C-H<sub>2</sub>SO<sub>4</sub> (10 mg), [EMIM]Cl (1 g, 7 mmol), 100 °C, 2 h

```

=====
Acq. Operator   : SYSTEM                      Seq. Line : 53
Acq. Instrument : HPLC-DAD                   Location  : P1-F-09
Injection Date  : 1/5/2022 1:07:35 AM        Inj       : 1
                                           Inj Volume: 10.000 µl
Acq. Method     : D:\DATA\2022\Thang 1\03-01-Hang_Trinh_Ha\2022-04-01-HMF 2022-01-04 09-26-24
                                           \HMF_cot 150_hat nho.M
Last changed    : 11/30/2021 8:55:26 PM by SYSTEM
Analysis Method : D:\METHOD\HMF_cot 150_hat nho_285nmKQ.M
Last changed    : 12/29/2021 10:03:33 PM by SYSTEM
  
```

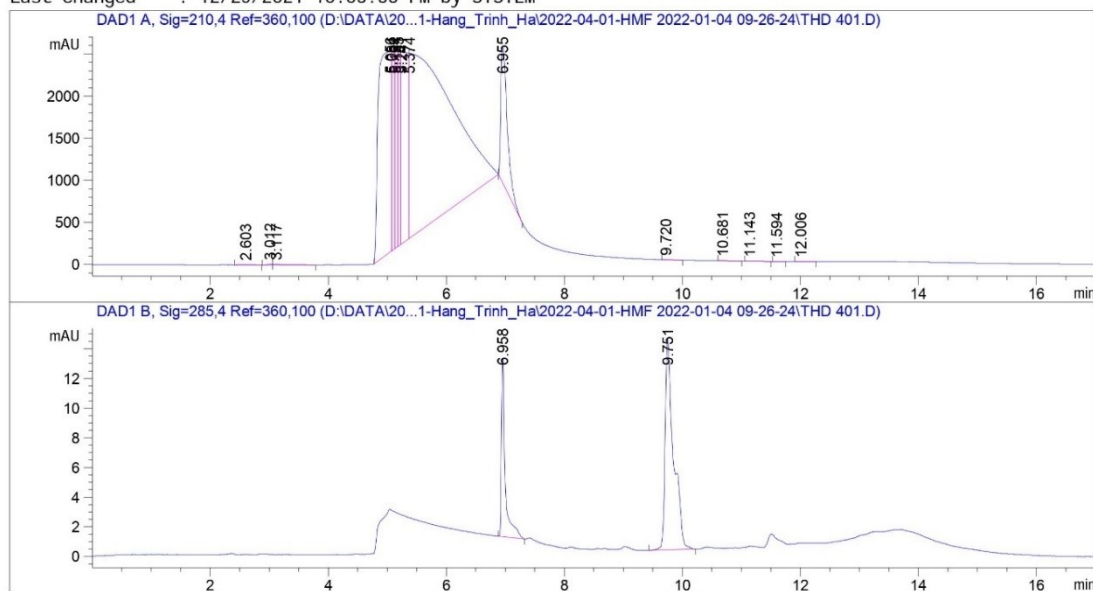

External Standard Report

```

Sorted By      : Signal
Calib. Data Modified : 12/29/2021 10:00:38 PM
Multiplier     : 1.0000
Dilution       : 1.0000
Do not use Multiplier & Dilution Factor with ISTDs
  
```

Signal 1: DAD1 A, Sig=210,4 Ref=360,100

Signal 2: DAD1 B, Sig=285,4 Ref=360,100

| RetTime [min] | Type | Area [mAU*s] | Amt/Area   | Amount [ppm] | Grp | Name           |
|---------------|------|--------------|------------|--------------|-----|----------------|
| 8.900         | -    | -            | -          | -            | -   | Levulinic acid |
| 9.751         | BB   | 140.46152    | 6.81206e-3 | 9.56832e-1   | -   | HMF            |
| 10.401        | -    | -            | -          | -            | -   | DFF            |
| 11.097        | -    | -            | -          | -            | -   | FDCA           |
| 11.400        | -    | -            | -          | -            | -   | Furfural       |

Fig. S85 Reaction conditions: Cellulose (162 mg), C-H<sub>2</sub>SO<sub>4</sub> (10 mg), [EMIM]Cl (1 g, 7 mmol), 100 °C, 4 h



```

=====
Acq. Operator   : SYSTEM                      Seq. Line :    4
Acq. Instrument : HPLC-DAD                   Location  : P1-F-03
Injection Date  : 1/14/2022 11:52:14 AM      Inj       :    1
                                           Inj Volume: 10.000 µl
Acq. Method     : D:\DATA\2022\Thang 1\13-01-HMF\2022-02-01-HMF 2022-01-14 10-57-11\HMF_cot
                                           150_hat.nho.M
Last changed    : 11/30/2021 8:55:26 PM by SYSTEM
Analysis Method : D:\METHOD\HMF_cot_150_hat.nho_285nm.KQ.M
Last changed    : 12/29/2021 10:03:33 PM by SYSTEM
Additional Info : Peak(s) manually integrated
  
```

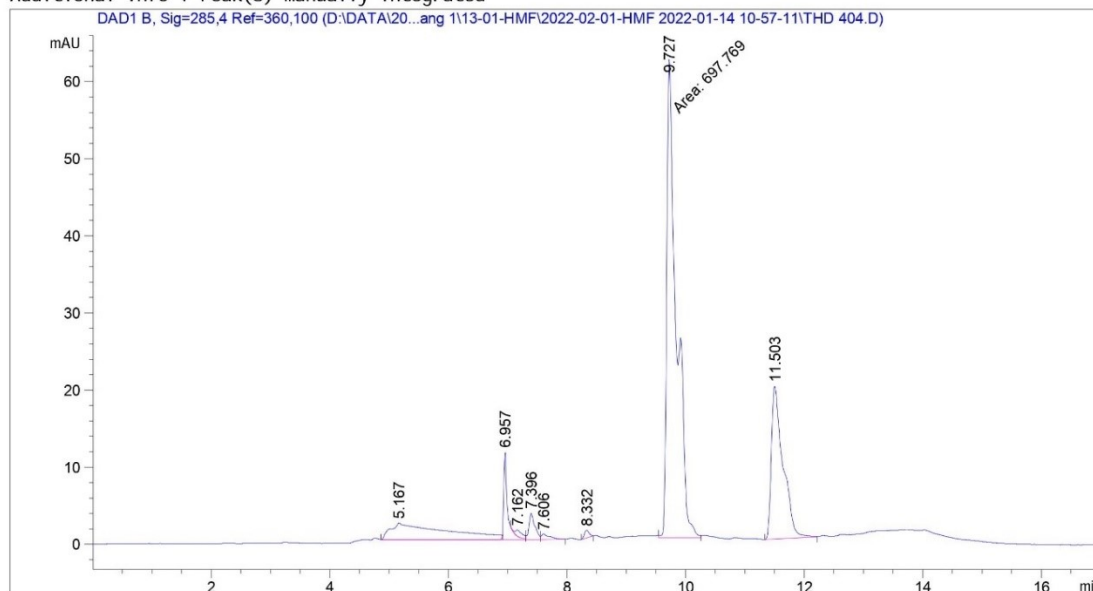

External Standard Report

```

=====
Sorted By      : Signal
Calib. Data Modified : 12/29/2021 10:00:38 PM
Multiplier     : 1.0000
Dilution       : 1.0000
Do not use Multiplier & Dilution Factor with ISTDs
  
```

Signal 1: DAD1 B, Sig=285,4 Ref=360,100

| RetTime [min] | Type | Area [mAU*s] | Amt/Area   | Amount [ppm] | Grp | Name           |
|---------------|------|--------------|------------|--------------|-----|----------------|
| 8.900         | -    | -            | -          | -            | -   | Levulinic acid |
| 9.727         | MM   | 697.76898    | 9.07825e-3 | 6.33452      | -   | HMF            |
| 10.401        | -    | -            | -          | -            | -   | DFF            |
| 11.097        | -    | -            | -          | -            | -   | FDCA           |
| 11.503        | BB   | 269.86777    | 9.28957e-3 | 2.50696      | -   | Furfural       |
| Totals :      |      |              |            | 8.84147      |     |                |

Fig. S86 Reaction conditions: Cellulose (162 mg), C-H<sub>2</sub>SO<sub>4</sub> (10 mg), [EMIM]Cl (1 g, 7 mmol), 100 °C, 8 h

```

=====
Acq. Operator   : SYSTEM                      Seq. Line : 15
Acq. Instrument : HPLC-DAD                   Location  : P1-B-01
Injection Date  : 1/16/2022 8:56:43 PM      Inj       : 1
                                           Inj Volume: 10.000 µl
Acq. Method     : D:\DATA\2022\Thang 1\16-01-HMF\2022-16-01-HMF 2022-01-16 16-43-50\HMF_cot
                                           150_hat_nho.M
Last changed    : 11/30/2021 8:55:26 PM by SYSTEM
Analysis Method : D:\METHOD\HMF_cot 150_hat_nho_285nmKQ.M
Last changed    : 12/29/2021 10:03:33 PM by SYSTEM
Additional Info : Peak(s) manually integrated
  
```

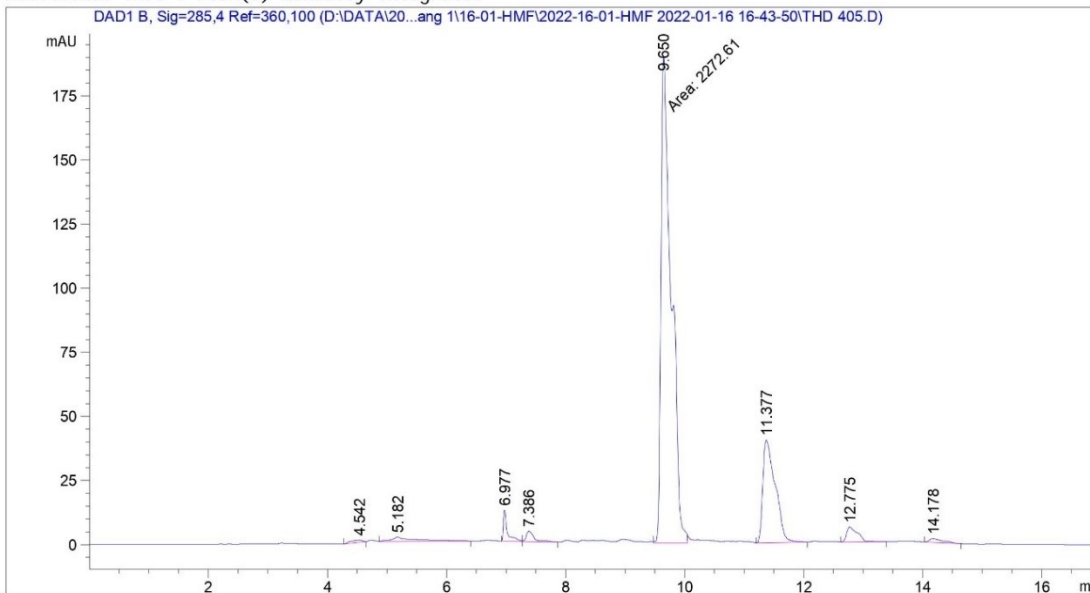

External Standard Report

```

Sorted By       : Signal
Calib. Data Modified : 12/29/2021 10:00:38 PM
Multiplier      : 1.0000
Dilution        : 1.0000
Do not use Multiplier & Dilution Factor with ISTDs
  
```

Signal 1: DAD1 B, Sig=285,4 Ref=360,100

| RetTime [min] | Type | Area [mAU*s] | Amt/Area   | Amount [ppm] | Grp | Name           |
|---------------|------|--------------|------------|--------------|-----|----------------|
| 8.900         | -    | -            | -          | -            | -   | Levulinic acid |
| 9.650         | MM   | 2272.60791   | 9.47404e-3 | 21.53078     | -   | HMF            |
| 10.401        | -    | -            | -          | -            | -   | DFF            |
| 11.097        | -    | -            | -          | -            | -   | FDCA           |
| 11.377        | BB   | 579.27551    | 9.78413e-3 | 5.66771      | -   | Furfural       |

Totals : 27.19849

Fig. S87 Reaction conditions: Cellulose (162 mg), C-H<sub>2</sub>SO<sub>4</sub> (10 mg), [EMIM]Cl (1 g, 7 mmol), 100 °C, 18 h

```

=====
Acq. Operator   : SYSTEM                      Seq. Line : 55
Acq. Instrument : HPLC-DAD                    Location  : P1-A-03
Injection Date  : 1/5/2022 1:43:45 AM         Inj       : 1
                                           Inj Volume: 10.000 µl
Acq. Method     : D:\DATA\2022\Thang 1\03-01-Hang_Trinh_Ha\2022-04-01-HMF 2022-01-04 09-26-24
                                           \HMF_cot 150_hat nho.M
Last changed    : 11/30/2021 8:55:26 PM by SYSTEM
Analysis Method : D:\METHOD\HMF_cot 150_hat nho_285nmKQ.M
Last changed    : 12/29/2021 10:03:33 PM by SYSTEM
Additional Info  : Peak(s) manually integrated
  
```

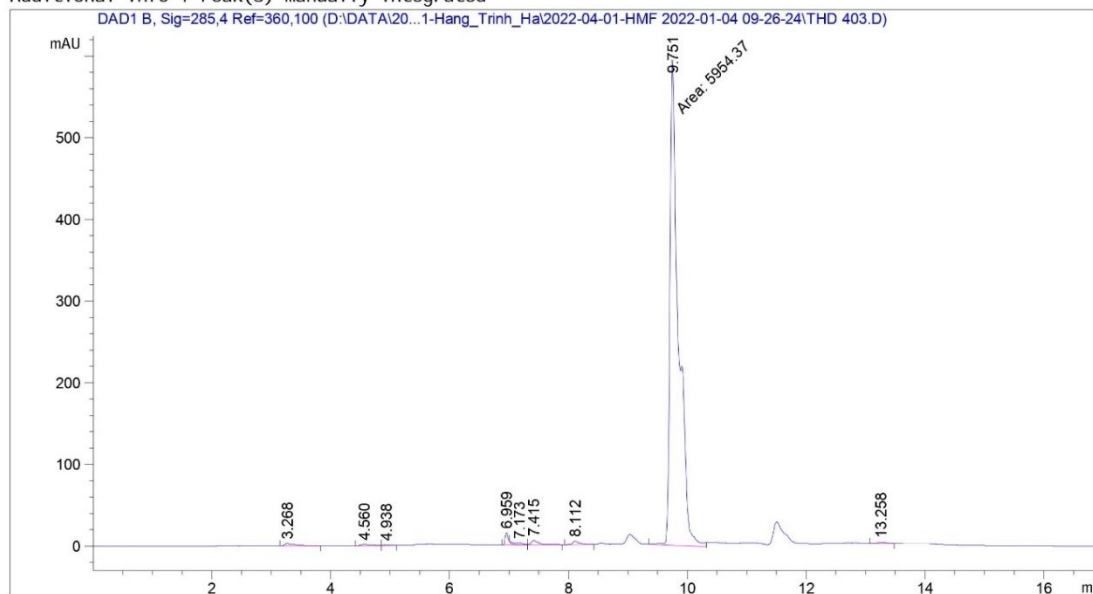

External Standard Report

```

=====
Sorted By      : Signal
Calib. Data Modified : 12/29/2021 10:00:38 PM
Multiplier     : 1.0000
Dilution      : 1.0000
Do not use Multiplier & Dilution Factor with ISTDs
  
```

Signal 1: DAD1 B, Sig=285,4 Ref=360,100

| RetTime [min] | Type | Area [mAU*s] | Amt/Area   | Amount [ppm] | Grp | Name           |
|---------------|------|--------------|------------|--------------|-----|----------------|
| 8.900         | -    | -            | -          | -            | -   | Levulinic acid |
| 9.751         | MM   | 5954.37012   | 9.58248e-3 | 57.05762     | -   | HMF            |
| 10.401        | -    | -            | -          | -            | -   | DFF            |
| 11.097        | -    | -            | -          | -            | -   | FDCA           |
| 11.400        | -    | -            | -          | -            | -   | Furfural       |

Totals : 57.05762

Fig. S88 Reaction conditions: Cellulose (162 mg), C-H<sub>2</sub>SO<sub>4</sub> (10 mg), [EMIM]Cl (1 g, 7 mmol), 100 °C, 24 h

```

=====
Acq. Operator   : SYSTEM                      Seq. Line : 31
Acq. Instrument : HPLC-DAD                   Location  : P1-C-09
Injection Date  : 1/2/2022 7:39:36 PM        Inj       : 1
                                           Inj Volume: 10.000 µl
Acq. Method     : D:\DATA\2022\Thang 1\02-01-Hang_Trinh_Ha\2021-12-31-HMF 2022-01-02 10-35-56
                                           \HMF_cot 150_hat nho.M
Last changed    : 11/30/2021 8:55:26 PM by SYSTEM
Analysis Method : D:\METHOD\HMF_cot 150_hat nho_285nmKQ.M
Last changed    : 12/29/2021 10:03:33 PM by SYSTEM
Additional Info : Peak(s) manually integrated
  
```

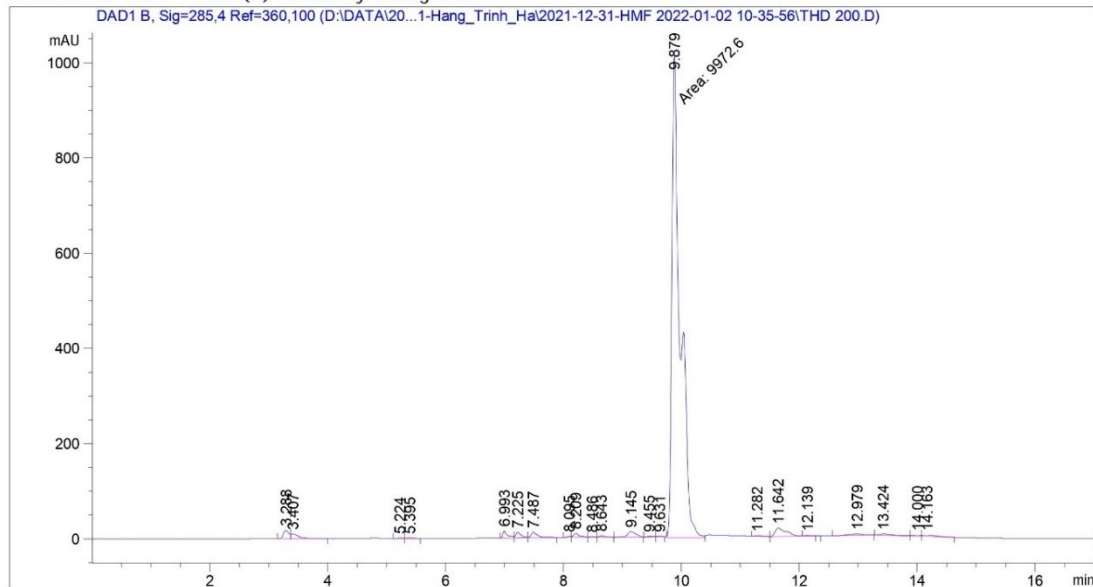

External Standard Report

```

Sorted By      : Signal
Calib. Data Modified : 12/29/2021 10:00:38 PM
Multiplier     : 1.0000
Dilution       : 1.0000
Do not use Multiplier & Dilution Factor with ISTDs
  
```

Signal 1: DAD1 B, Sig=285,4 Ref=360,100

| RetTime [min] | Type | Area [mAU*s] | Amt/Area   | Amount [ppm] | Grp | Name           |
|---------------|------|--------------|------------|--------------|-----|----------------|
| 8.900         |      | -            | -          | -            |     | Levulinic acid |
| 9.879         | MM   | 9972.60449   | 9.60945e-3 | 95.83120     |     | HMF            |
| 10.401        |      | -            | -          | -            |     | DFF            |
| 11.097        |      | -            | -          | -            |     | FDCA           |
| 11.282        | BB   | 15.24448     | 0.00000    | 0.00000      |     | Furfural       |

Totals : 95.83120

Fig. S89 Reaction conditions: Cellulose (162 mg), C-H<sub>2</sub>SO<sub>4</sub> (10 mg), [EMIM]Cl (1 g, 7 mmol), 140 °C, 2 h

```

=====
Acq. Operator   : SYSTEM                               Seq. Line :   50
Acq. Instrument : HPLC-DAD                             Location  : P1-F-06
Injection Date  : 1/5/2022 12:13:24 AM                 Inj       :    1
                                                    Inj Volume: 10.000 µl
Acq. Method     : D:\DATA\2022\Thang 1\03-01-Hang_Trinh_Ha\2022-04-01-HMF 2022-01-04 09-26-24
                  \HMF_cot 150_hat nho.M
Last changed    : 11/30/2021 8:55:26 PM by SYSTEM
Analysis Method : D:\METHOD\HMF_cot 150_hat nho_285nmKQ.M
Last changed    : 12/29/2021 10:03:33 PM by SYSTEM
Additional Info  : Peak(s) manually integrated
  
```

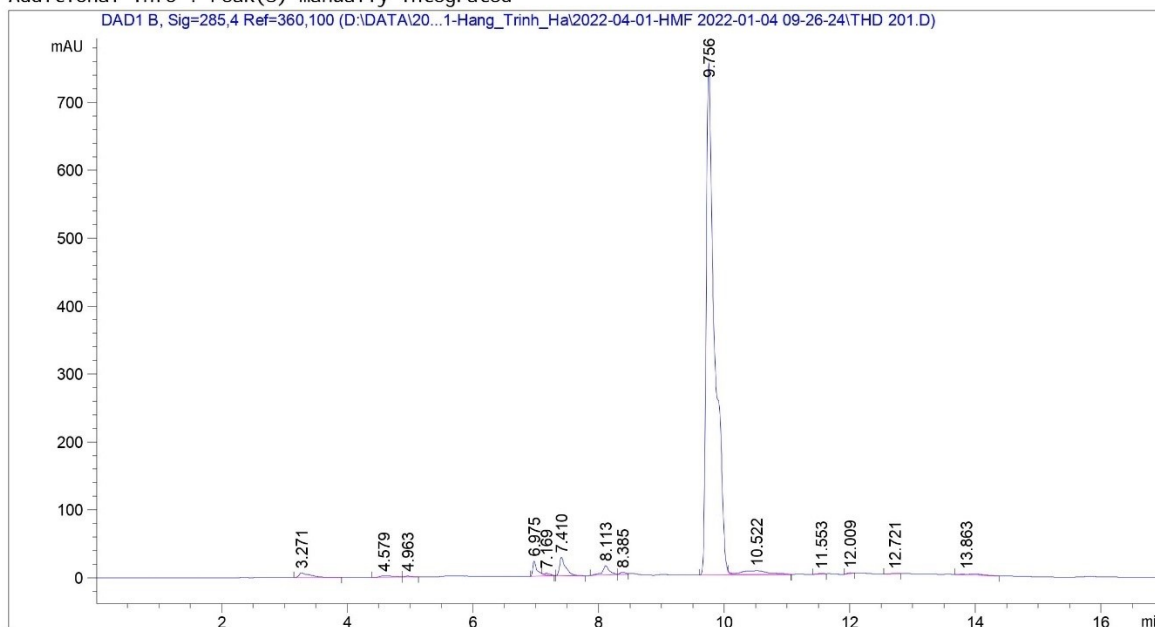

External Standard Report

```

Sorted By      :      Signal
Calib. Data Modified : 12/29/2021 10:00:38 PM
Multiplier     :      1.0000
Dilution       :      1.0000
Do not use Multiplier & Dilution Factor with ISTDs
  
```

Signal 1: DAD1 B, Sig=285,4 Ref=360,100

| RetTime [min] | Type | Area [mAU*s] | Amt/Area   | Amount [ppm] | Grp | Name           |
|---------------|------|--------------|------------|--------------|-----|----------------|
| 8.900         |      | -            | -          | -            |     | Levulinic acid |
| 9.756         | BV R | 7143.93262   | 9.59362e-3 | 68.53619     |     | HMF            |
| 10.522        | VB E | 178.90971    | 1.22061e-2 | 2.18380      |     | DFP            |
| 11.097        |      | -            | -          | -            |     | FDCA           |
| 11.553        | BB   | 5.15884      | 0.00000    | 0.00000      |     | Furfural       |

Totals : 70.71999

Fig. S90 Reaction conditions: Cellulose (162 mg), C-H<sub>2</sub>SO<sub>4</sub> (10 mg), [EMIM]Cl (1 g, 7 mmol), 140 °C, 4 h



```

=====
Acq. Operator   : SYSTEM                      Seq. Line :   51
Acq. Instrument : HPLC-DAD                   Location  : P1-F-07
Injection Date  : 1/5/2022 12:31:28 AM      Inj       :    1
                                           Inj Volume: 10.000 µl
Acq. Method     : D:\DATA\2022\Thang 1\03-01-Hang_Trinh_Ha\2022-04-01-HMF 2022-01-04 09-26-24
                                           \HMF_cot 150_hat nho.M
Last changed    : 11/30/2021 8:55:26 PM by SYSTEM
Analysis Method : D:\METHOD\HMF_cot 150_hat nho_285nmKQ.M
Last changed    : 12/29/2021 10:03:33 PM by SYSTEM
Additional Info : Peak(s) manually integrated
  
```

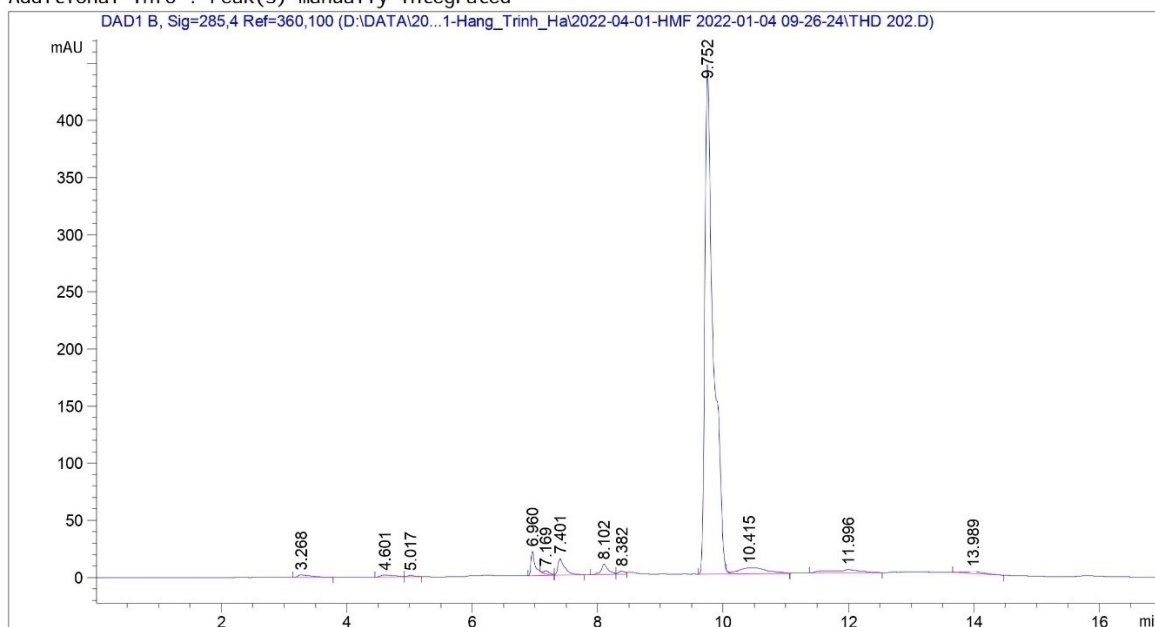

External Standard Report

```

Sorted By      :      Signal
Calib. Data Modified : 12/29/2021 10:00:38 PM
Multiplier     :      1.0000
Dilution       :      1.0000
Do not use Multiplier & Dilution Factor with ISTDs
  
```

Signal 1: DAD1 B, Sig=285,4 Ref=360,100

| RetTime [min] | Type | Area [mAU*s] | Amt/Area   | Amount [ppm] | Grp | Name           |
|---------------|------|--------------|------------|--------------|-----|----------------|
| 8.900         | -    | -            | -          | -            | -   | Levulinic acid |
| 9.752         | BV R | 4217.78271   | 9.55492e-3 | 40.30057     |     | HMF            |
| 10.415        | VB E | 154.10184    | 1.24966e-2 | 1.92575      |     | DFE            |
| 11.097        | -    | -            | -          | -            | -   | FDCA           |
| 11.400        | -    | -            | -          | -            | -   | Furfural       |

Totals : 42.22632

Fig. S91 Reaction conditions: Cellulose (162 mg), C-H<sub>2</sub>SO<sub>4</sub> (10 mg), [EMIM]Cl (1 g, 7 mmol), 140 °C, 8 h

```

=====
Acq. Operator   : SYSTEM                               Seq. Line :    3
Acq. Instrument : HPLC-DAD                             Location  : P1-F-02
Injection Date  : 1/14/2022 11:34:12 AM                Inj       :    1
                                                    Inj Volume: 10.000 µl

Acq. Method     : D:\DATA\2022\Thang 1\13-01-HMF\2022-02-01-HMF 2022-01-14 10-57-11\HMF_cot
                  150_hat_nho.M
Last changed    : 11/30/2021 8:55:26 PM by SYSTEM
Analysis Method : D:\METHOD\HMF_cot 150_hat_nho_285nmKQ.M
Last changed    : 12/29/2021 10:03:33 PM by SYSTEM
Additional Info  : Peak(s) manually integrated
  
```

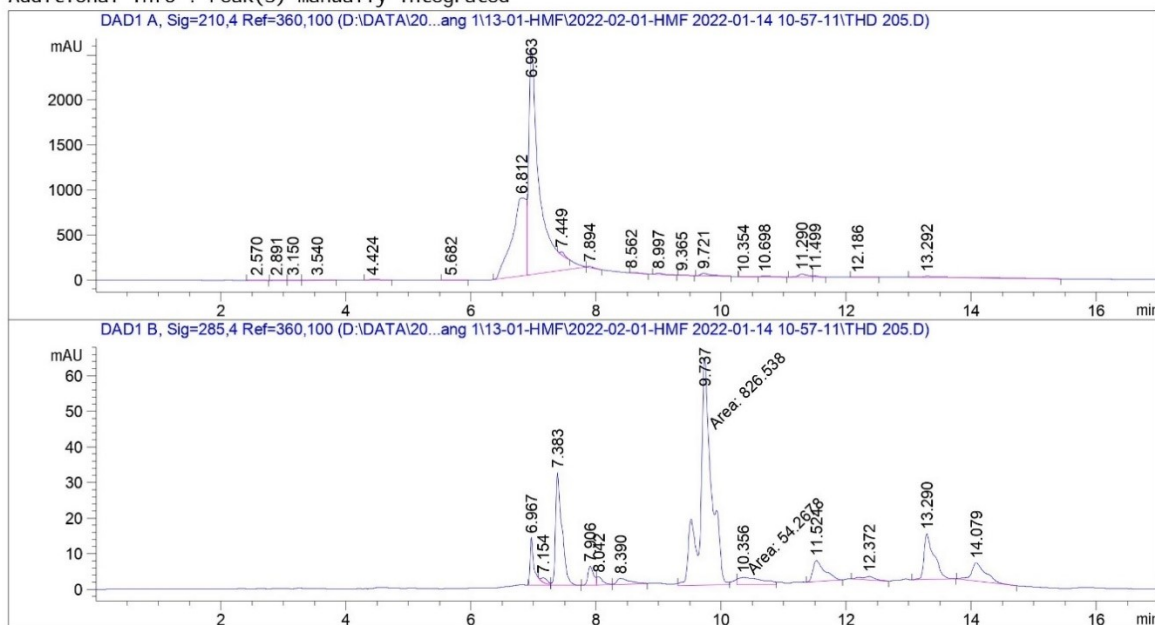

External Standard Report

```

Sorted By      :      Signal
Calib. Data Modified : 12/29/2021 10:00:38 PM
Multiplier     :      1.0000
Dilution       :      1.0000
Do not use Multiplier & Dilution Factor with ISTDs
  
```

Signal 1: DAD1 A, Sig=210,4 Ref=360,100

Signal 2: DAD1 B, Sig=285,4 Ref=360,100

| RetTime [min] | Type | Area [mAU*s] | Amt/Area   | Amount [ppm] | Grp | Name           |
|---------------|------|--------------|------------|--------------|-----|----------------|
| 8.900         | -    | -            | -          | -            | -   | Levulinic acid |
| 9.737         | MM   | 826.53815    | 9.16723e-3 | 7.57707      | -   | HMF            |
| 10.356        | MM   | 54.26775     | 1.63502e-2 | 8.87288e-1   | -   | DFF            |
| 11.097        | -    | -            | -          | -            | -   | FDCA           |

Fig. S92 Reaction conditions: Cellulose (162 mg), C-H<sub>2</sub>SO<sub>4</sub> (10 mg), [EMIM]Cl (1 g, 7 mmol), 140 °C, 18 h

```

=====
Acq. Operator   : SYSTEM                               Seq. Line : 52
Acq. Instrument : HPLC-DAD                             Location  : P1-F-08
Injection Date  : 1/5/2022 12:49:32 AM                 Inj       : 1
                                                    Inj Volume: 10.000 µl
Acq. Method     : D:\DATA\2022\Thang 1\03-01-Hang_Trinh_Ha\2022-04-01-HMF 2022-01-04 09-26-24
                  \HMF_cot 150_hat_nho.M
Last changed    : 11/30/2021 8:55:26 PM by SYSTEM
Analysis Method : D:\METHOD\HMF_cot 150_hat_nho_285nmKQ.M
Last changed    : 12/29/2021 10:03:33 PM by SYSTEM
Additional Info  : Peak(s) manually integrated
  
```

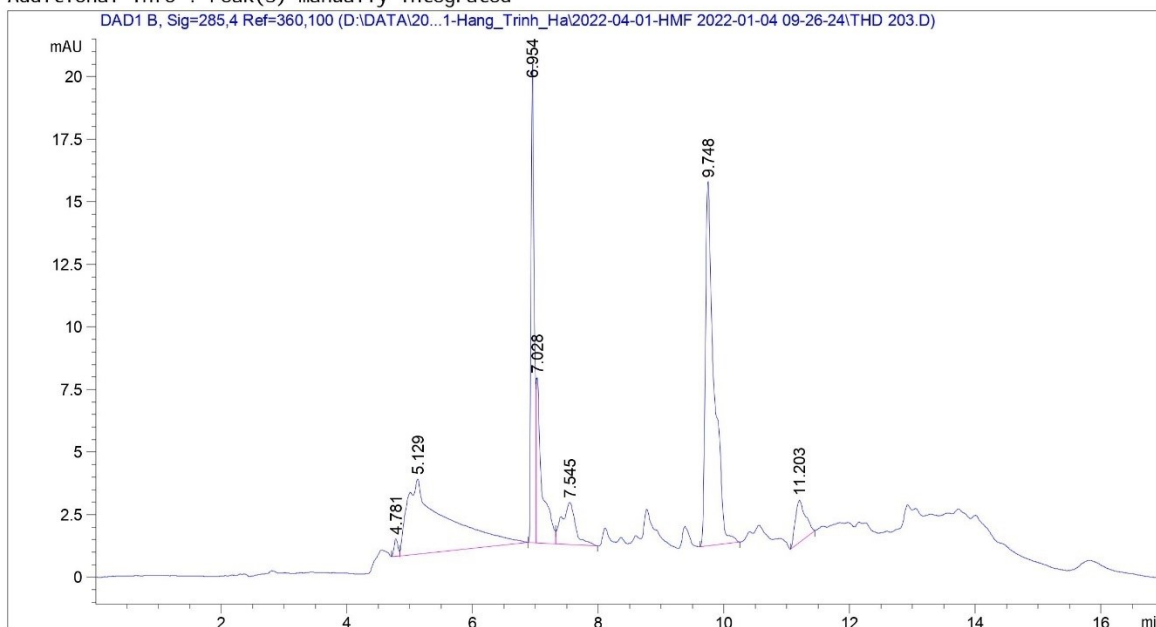

External Standard Report

```

Sorted By      : Signal
Calib. Data Modified : 12/29/2021 10:00:38 PM
Multiplier     : 1.0000
Dilution       : 1.0000
Do not use Multiplier & Dilution Factor with ISTDs
  
```

Signal 1: DAD1 B, Sig=285,4 Ref=360,100

| RetTime [min] | Type | Area [mAU*s] | Amt/Area   | Amount [ppm] | Grp | Name           |
|---------------|------|--------------|------------|--------------|-----|----------------|
| 8.900         |      | -            | -          | -            |     | Levulinic acid |
| 9.748         | BB   | 140.04756    | 6.80367e-3 | 9.52837e-1   |     | HMF            |
| 10.401        |      | -            | -          | -            |     | DFF            |
| 11.203        | BB   | 18.58884     | 0.00000    | 0.00000      |     | FDCA           |
| 11.400        |      | -            | -          | -            |     | Furfural       |

Totals : 9.52837e-1

Fig. S93 Reaction conditions: Cellulose (162 mg), C-H<sub>2</sub>SO<sub>4</sub> (10 mg), [EMIM]Cl (1 g, 7 mmol), 140 °C, 24 h

```

=====
Acq. Operator   : SYSTEM                      Seq. Line :   35
Acq. Instrument : HPLC-DAD                   Location  : P1-D-01
Injection Date  : 12/23/2021 4:24:32 AM      Inj       :    1
                                           Inj Volume: 10.000 µl
Acq. Method    : D:\DATA\2021\Thang 12\22-12-Hang_Trinh_Ha\2021-12-22-HMF 2021-12-22 18-08-06\HMF_cot 150_hat_nho.M
Last changed   : 11/30/2021 8:55:26 PM by SYSTEM
Analysis Method: D:\METHOD\HMF_cot 150_hat_nho_KQ.M
Last changed   : 12/24/2021 12:53:59 PM by SYSTEM
Additional Info: Peak(s) manually integrated
  
```

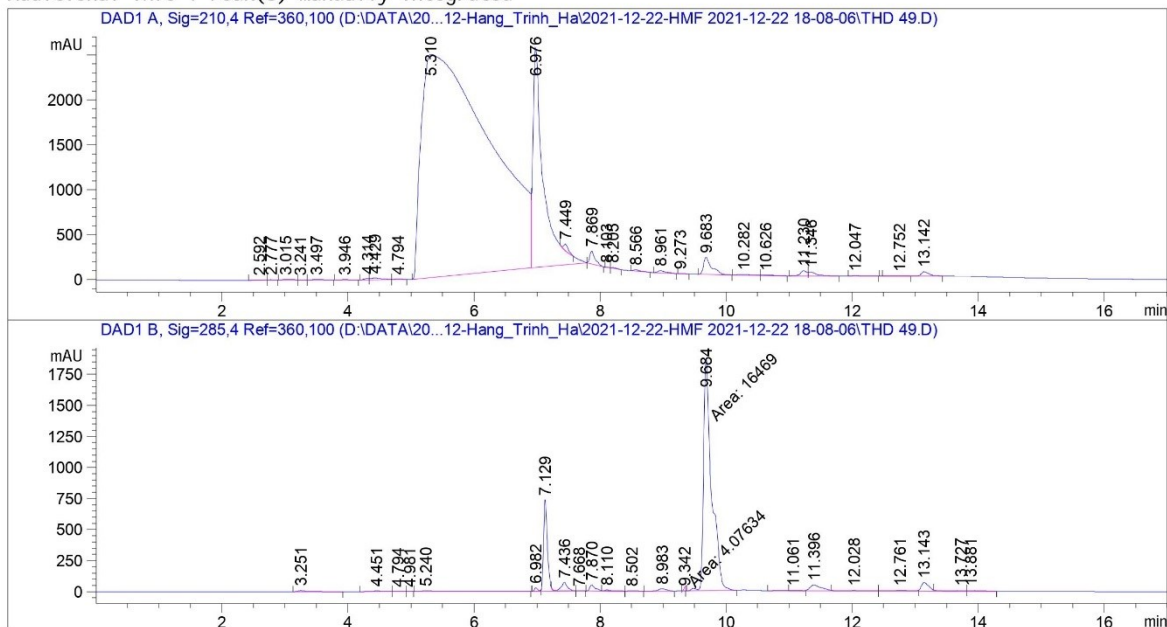

External Standard Report

```

Sorted By      : Signal
Calib. Data Modified : 12/24/2021 12:50:07 PM
Multiplier     : 1.0000
Dilution      : 1.0000
Do not use Multiplier & Dilution Factor with ISTDs
  
```

Signal 1: DAD1 A, Sig=210,4 Ref=360,100

| RetTime [min] | Type | Area [mAU*s] | Amt/Area   | Amount [ppm] | Grp | Name           |
|---------------|------|--------------|------------|--------------|-----|----------------|
| 3.946         | BB   | 54.11307     | 1.37657    | 74.49016     |     | Formic acid    |
| 8.961         | BB   | 202.83208    | 3.46093    | 701.98666    |     | Levulinic acid |
| 9.683         | BB   | 1701.93420   | 1.22948e-1 | 209.24898    |     | HMF            |
| 10.282        | BV   | 96.59569     | 3.67382e-2 | 3.54876      |     | DFF            |
| 11.230        | BV   | 416.63748    | 1.93799e-1 | 80.74412     |     | FDCA           |
| 11.346        | VB   | 366.60788    | 1.04528e-1 | 38.32092     |     | Furfural       |

Fig. S94 First recycling reaction. Reaction conditions: Cellulose (162 mg), C-H<sub>2</sub>SO<sub>4</sub> (10 mg), [EMIM]Cl (1 g, 7 mmol), 120 °C, 24 h

```

=====
Acq. Operator   : SYSTEM                      Seq. Line :   36
Acq. Instrument : HPLC-DAD                   Location  : P1-D-02
Injection Date  : 12/23/2021 4:42:36 AM      Inj       :    1
                                           Inj Volume: 10.000 µl
Acq. Method    : D:\DATA\2021\Thang 12\22-12-Hang_Trinh_Ha\2021-12-22-HMF 2021-12-22 18-08-06\HMF_cot 150_hat_nho.M
Last changed   : 11/30/2021 8:55:26 PM by SYSTEM
Analysis Method: D:\METHOD\HMF_cot 150_hat_nho_KQ.M
Last changed   : 12/25/2021 8:42:31 AM by SYSTEM
                (modified after loading)
  
```

Additional Info : Peak(s) manually integrated

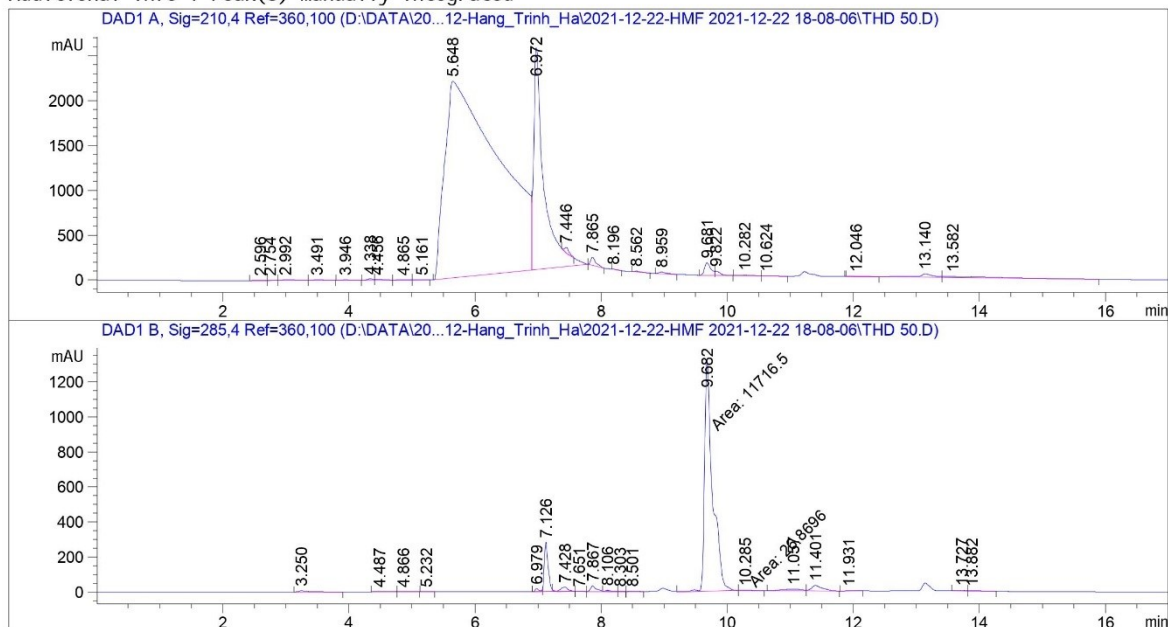

External Standard Report

```

Sorted By      :      Signal
Calib. Data Modified : 12/25/2021 8:45:54 AM
Multiplier     :      1.0000
Dilution       :      1.0000
Do not use Multiplier & Dilution Factor with ISTDs
  
```

Signal 1: DAD1 A, Sig=210,4 Ref=360,100

| RetTime [min] | Type | Area [mAU*s] | Amt/Area   | Amount [ppm] | Grp | Name           |
|---------------|------|--------------|------------|--------------|-----|----------------|
| 3.491         | VB   | 97.04059     | 1.33170    | 129.22924    |     | Formic acid    |
| 8.959         | BB   | 151.47473    | 3.47029    | 525.66123    |     | Levulinic acid |
| 9.681         | BV   | 977.57654    | 1.22337e-1 | 119.59412    |     | HMF            |
| 10.282        | BV   | 98.53720     | 3.72306e-2 | 3.66859      |     | DFF            |
| 11.000        |      | -            | -          | -            |     | FDCA           |
| 11.300        |      | -            | -          | -            |     | Furfural       |

Fig. S95 Second recycling reaction. Reaction conditions: Cellulose (162 mg), C-H<sub>2</sub>SO<sub>4</sub> (10 mg), [EMIM]Cl (1 g, 7 mmol), 120 °C, 24 h.
